# Supplementary material for: Asymmetric decarboxylative [3 + 2] cycloaddition for the diastereo- and enantioselective synthesis of spiro[2.4]heptanes via cyclopropanation
Source: Royal Society of Chemistry journal article supplement (doi:10.1039/d2qo00124a), 2022-01-01
Supplement: d2qo00124a1.pdf [file d2qo00124a1.pdf]

## SUPPORTING INFORMATION

### **Asymmetric Decarboxylative [3+2] Cycloaddition for the Diastereo- and Enantioselective Synthesis of Spiro[2.4]heptanes via Cyclopropanation**

Can Gao,<sup>#</sup> Ting Zhang,<sup>#</sup> Xiaoxun Li, Jing-De Wu,<sup>\*</sup> and Jitian Liu<sup>\*</sup>

Department of Medicinal Chemistry, Key Laboratory of Chemical Biology (Ministry of Education),  
School of Pharmaceutical Sciences, Cheeloo College of Medicine, Shandong University, Jinan,  
Shandong, 250012, China.

<sup>#</sup> Can Gao and Ting Zhang contributed equally to this work.

## Table of Contents

|                                                                                        |    |
|----------------------------------------------------------------------------------------|----|
| 1. General Information.....                                                            | 3  |
| 2. Reaction Optimization .....                                                         | 4  |
| 3. Representative procedure and data for the synthesis of <b>L9</b> and <b>3</b> ..... | 7  |
| 4. Representative procedure and data for the synthesis of <b>5</b> .....               | 17 |
| 5. Large Scale Synthesis and Further Product Diversification .....                     | 23 |
| 6. X-ray Crystallography data of <b>3m</b> and <b>5a</b> .....                         | 26 |
| 7. References.....                                                                     | 40 |
| 8. Spectra.....                                                                        | 41 |
| 9. HPLC Spectra .....                                                                  | 71 |

## 1. General Information

Unless otherwise noted, all the reactions for the preparation of the substrates were performed in oven-dried glassware under nitrogen atmosphere with freshly distilled solvents. The catalytic reactions were performed under nitrogen atmosphere. The solvents were purified by distillation from calcium hydride unless otherwise noted. All other commercial reagents were used without further purification unless otherwise indicated.  $^1\text{H}$  NMR,  $^{13}\text{C}$  NMR and  $^{31}\text{P}$  spectra were recorded on Bruker 400 MHz spectrometer (ADVANCE III) using chloroform-*d* ( $\text{CDCl}_3$ ) as the internal standard. Chemical shifts were reported in parts per million (ppm), and the residual solvent peak was used as an internal reference: proton (chloroform  $\delta$  7.26), carbon (chloroform  $\delta$  77.1) or tetramethylsilane (TMS  $\delta$  0.00) was used as a reference. Data are reported as follows: chemical shift, multiplicity (s = singlet, d = doublet, t = triplet, q = quartet, m = multiplet, br = broad), coupling constants (Hz) and integration. The enantiomeric excesses (e.e.) was determined by HPLC analysis on LC-20AD/T LPGE KIT using Daicel CHIRALPAK® column IA-U, IC-U. X-ray diffraction analyses were carried out on a microcrystalline powder using a Rigaku Oxford Diffraction XtaLAB Synergy-S diffractometer using Cu radiation ( $\lambda = 1.54184 \text{ \AA}$ ). If not specially mentioned, flash column chromatography was performed using 200-300 silica gel purchased from Yaitai Chemicals (China). High-resolution mass spectra (HRMS) were recorded on a Bruker Apex IV FTMS mass spectrometer using ESI (electrospray ionization) as ionization method. Optical rotations were recorded on an AUTOPOL II digital polarimeter at 589 nm and are recorded as  $[\alpha]_{\text{D}}^{\text{T}}$  (concentration in grams/100 mL solvent). The  $\gamma$ -methylidene- $\delta$ -valerolactones<sup>[1]</sup> and indolyl nitroolefins<sup>[2-3]</sup> were prepared according to the reported procedure.





|    |                                                 |            |     |     |    |
|----|-------------------------------------------------|------------|-----|-----|----|
| 15 | $\text{Pd}_2(\text{dba})_3 \cdot \text{CHCl}_3$ | <b>L15</b> | 0   | --  | -- |
| 16 | $\text{Pd}_2(\text{dba})_3 \cdot \text{CHCl}_3$ | <b>L16</b> | 0   | --  | -- |
| 17 | $\text{Pd}(\text{PPh}_3)_4$                     | \          | 50% | 1:1 | 0  |

<sup>[a]</sup> Reaction conditions: 5 mol% of  $\text{Pd}_2(\text{dba})_3 \cdot \text{CHCl}_3$ , 22 mol% of Ligand, 0.12 mmol of **1a**, 0.1 mmol of **2a** and 4Å MS in THF (1 mL) at room temperature. <sup>[b]</sup> Isolated yield of **3a**. <sup>[c]</sup> Determined by  $^1\text{H}$  NMR analysis. <sup>[d]</sup> Determined by HPLC analysis.

After optimization, **L9** was selected for the next investigation.

**Table S2. Investigation of organocatalysts, solvents and temperature.**<sup>[a]</sup>

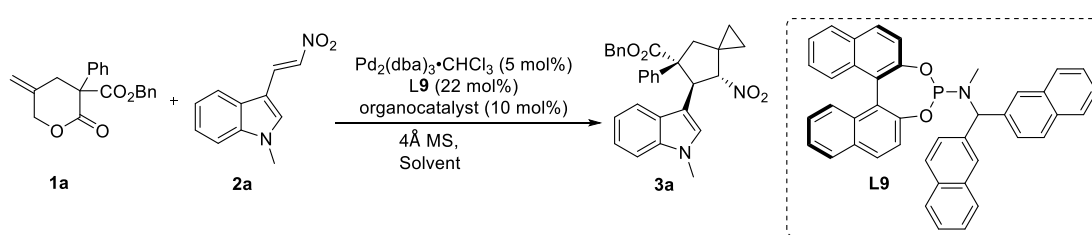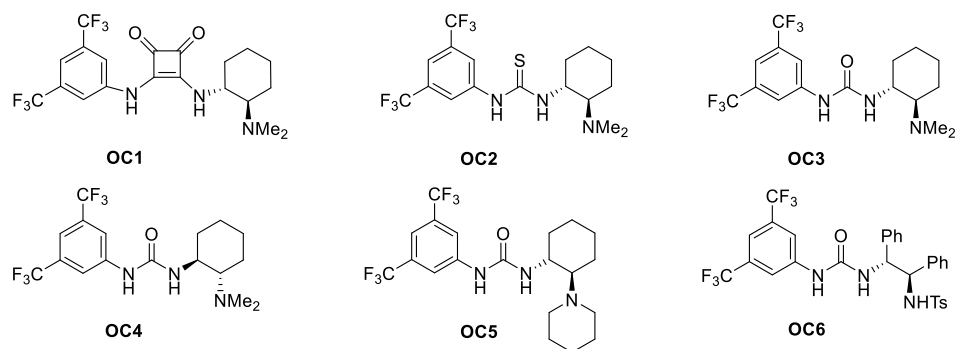

| Entry | OC         | Solvent | Temperature | Yield <sup>[b]</sup> | dr <sup>[c]</sup> | ee <sup>[d]</sup> |
|-------|------------|---------|-------------|----------------------|-------------------|-------------------|
| 1     | <b>OC1</b> | THF     | rt          | 42%                  | 1:1               | 83%               |
| 2     | <b>OC2</b> | THF     | rt          | 31                   | 1:1               | 72%               |
| 3     | <b>OC3</b> | THF     | rt          | 63%                  | 3:1               | 85%               |
| 4     | <b>OC4</b> | THF     | rt          | 50%                  | 2:1               | 85%               |
| 5     | <b>OC5</b> | THF     | rt          | 64%                  | 5:1               | 85%               |
| 6     | <b>OC6</b> | THF     | rt          | 0                    | --                | --                |
| 7     | <b>OC5</b> | Toluene | rt          | 53%                  | 2:1               | 75%               |
| 8     | <b>OC5</b> | DMF     | rt          | 49%                  | 2:1               | 76%               |
| 9     | <b>OC5</b> | Xylene  | rt          | 52%                  | 2:1               | 82%               |
| 10    | <b>OC5</b> | Anisole | rt          | 50%                  | 2:1               | 82%               |
| 11    | <b>OC5</b> | THF     | 0°C         | 64%                  | 4:1               | 87%               |
| 12    | <b>OC5</b> | THF     | -10°C       | 73%                  | 6:1               | 94%               |

<sup>[a]</sup> Reaction conditions: 5 mol% of  $\text{Pd}_2(\text{dba})_3 \cdot \text{CHCl}_3$ , 22 mol% of **L9**, 0.12 mmol of **1a**, 0.1 mmol of **2a** and 4Å MS in THF (1 mL) at room temperature. <sup>[b]</sup> Isolated yield of **3a**. <sup>[c]</sup> Determined by  $^1\text{H}$  NMR analysis. <sup>[d]</sup> Determined by HPLC analysis.

After optimization, the best reaction condition was with **OC6** and THF at -10 °C, which was used for next exploration.

**Table S3. Investigation of nitroolefins** <sup>[a]</sup>

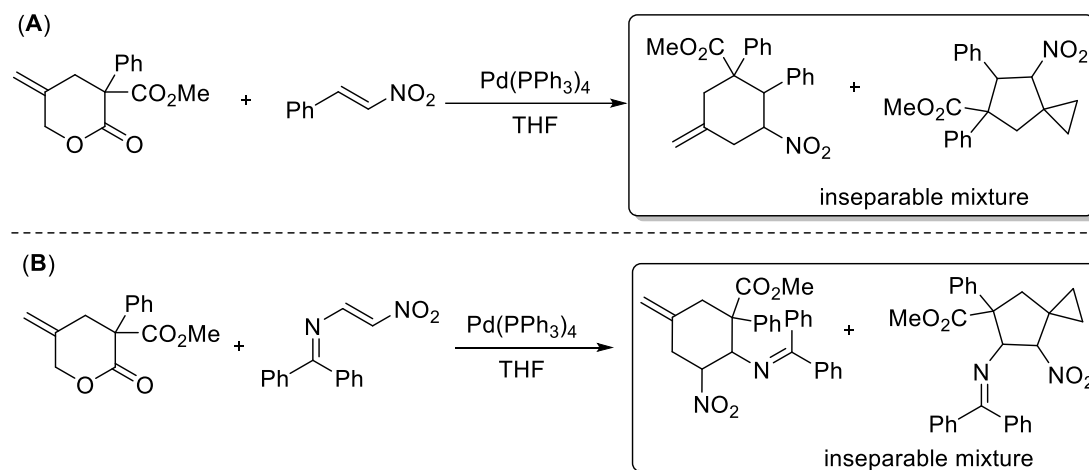

[a] Reaction conditions:  $\gamma$ -methylidene- $\delta$ -valerolactones (0.048 mmol), nitroolefins (0.04 mmol) and 5 mol% of Pd(PPh<sub>3</sub>)<sub>4</sub> in 0.4 mL THF at room temperature.

Besides indolyl nitroolefins and 2-nitrobenzofuran, other nitroolefins were also screened for this asymmetric cycloaddition. When (E)-(2-nitrovinyl)benzene (Table S3, **A**) and (E)-N-(2-nitrovinyl)-1,1-diphenylmethanimine (Table S3, **B**) were submitted to the standard reaction conditions, A mixture of both [4+2] and [3+2] cycloaddition adducts were generated which could not be separated and purified by silica gel chromatography. Therefore, indolyl nitroolefins and 2-nitrobenzofuran were used in this asymmetric [3+2] cycloaddition reaction.

### 3. Representative procedure and data for the synthesis of L9

#### and 3

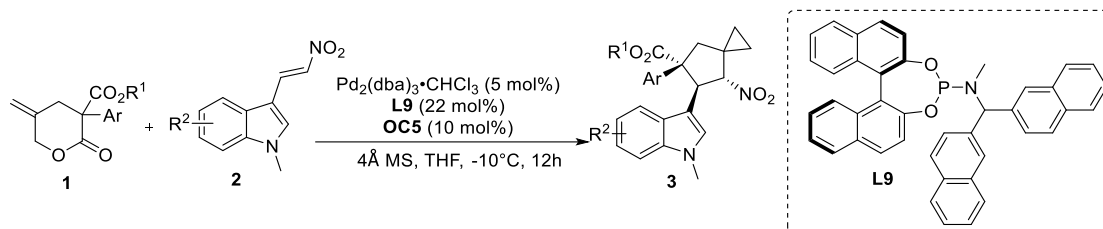

To a dried tube was added  $\gamma$ -methylidene- $\delta$ -valerolactone **1** (0.12 mmol, 1.2 equiv.), indole nitroolefins **2** (0.1 mmol, 1.0 equiv.),  $\text{Pd}_2(\text{dba})_3 \cdot \text{CHCl}_3$  (0.005 mmol, 5.2 mg, 5 mol%), **L9** (0.022 mmol, 13.4 mg, 22 mol%), **OC5** (0.01 mmol, 4.4 mg, 10 mol%) followed with the addition of 4Å molecule sieve and 1 mL of THF under nitrogen atmosphere. The reaction mixture was stirred at  $-10^\circ\text{C}$  for 12 h and directly purified by silica gel chromatography (hexane/ethyl acetate = 20:1-5:1) to yield the products.

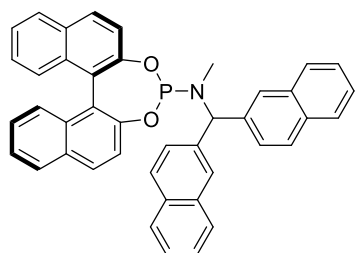

#### N-(di(naphthalen-2-yl)methyl)-N-methyldinaphtho[2,1-d':2'f][1,3,2]dioxaphosphin-4-amine (**L9**)

**L9** was synthesized according to the literature reported by Fletcher.<sup>[4]</sup> White solid, m.p. = 161-162  $^\circ\text{C}$ ;  $[\alpha]_D^{20.0} = -6.6$  (0.1,  $\text{CH}_2\text{Cl}_2$ );  $^1\text{H}$  NMR (400 MHz,  $\text{CDCl}_3$ )  $\delta$  2.25 (d,  $J = 4.0$  Hz, 3H), 6.31 (d,  $J = 10.8$  Hz, 1H), 7.03 (d,  $J = 8.8$  Hz, 1H), 7.17-7.23 (m, 2H), 7.28 - 7.34 (m, 2H), 7.38 (dd,  $J = 8.4, 5.8$  Hz, 2H), 7.43 - 7.52 (m, 5H), 7.55 - 7.64 (m, 3H), 7.77 (d,  $J = 8.2$  Hz, 1H), 7.81-7.85 (m, 6H), 7.92 (dt,  $J = 16.5, 8.5$  Hz, 4H) ppm;  $^{13}\text{C}$  NMR (100 MHz,  $\text{CDCl}_3$ )  $\delta$  65.5, 65.9, 121.8, 122.2, 122.5, 124.0, 124.1, 124.6, 124.9, 126.1, 126.2, 126.3, 126.4, 126.8, 127.0, 127.1, 127.4, 127.7, 127.8, 127.9, 128.0, 128.1, 128.2, 128.3, 128.4, 128.6, 130.0, 130.4, 130.7, 131.5, 132.6, 132.8, 132.9, 133.3, 133.4, 137.4, 137.5, 137.7, 137.8, 149.5, 150.1, 150.2 ppm;  $^{31}\text{P}$  NMR (160 MHz,  $\text{CDCl}_3$ )

$\delta$  148.7 ppm; HRMS (ESI)  $m/z$  calcd. for  $C_{42}H_{31}NO_2P$   $[M+H]^+$ : 612.2087, found: 612.2084.

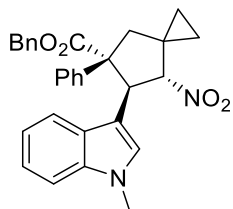

**Benzyl (5R,6S,7R)-6-(1-methyl-1H-indol-3-yl)-7-nitro-5-phenylspiro[2.4]heptane-5-carboxylate (3a)**

Colorless oil, 35mg, 73% yield; dr = 6 : 1, 94% ee;  $[\alpha]_D^{20.0} = -5.3$  (0.1,  $CH_2Cl_2$ ); [Daicel CHIRALPAK® IC-U (0.46 cm  $\times$  25 cm), *n*-hexane/2-propanol = 90/10,  $v = 1$  mL  $\cdot$  min $^{-1}$ ,  $\lambda = 254$  nm, t (major) = 13.3 min, t (minor) = 14.2 min];  $^1H$  NMR (400 MHz,  $CDCl_3$ )  $\delta$  0.73-0.81 (m, 1H), 0.85-0.93 (m, 1H), 1.07-1.14 (m, 1H), 1.15-1.21 (m, 1H), 2.63 (d,  $J = 13.8$  Hz, 1H), 2.95 (d,  $J = 13.8$  Hz, 1H), 3.55 (s, 3H), 5.00-5.04 (m, 2H), 5.18 (d,  $J = 12.4$  Hz, 1H), 5.36 (d,  $J = 10$  Hz, 1H), 6.11 (s, 1H), 6.96 (ddd,  $J = 8.0, 6.7, 1.2$  Hz, 1H), 7.04 (d,  $J = 7.5$  Hz, 2H), 7.08 – 7.19 (m, 6H), 7.20 (dt,  $J = 9.3, 3.3$  Hz, 2H), 7.28 (dd,  $J = 5.9, 2.6$  Hz, 3H) ppm;  $^{13}C$  NMR (100 MHz,  $CDCl_3$ )  $\delta$  13C NMR (101 MHz,  $CDCl_3$ )  $\delta$  14.4, 17.6, 23.2, 32.7, 44.5, 50.2, 60.9, 67.0, 97.5, 108.9, 109.00, 119.2, 119.8, 121.4, 127.0, 127.4, 127.8, 128.1, 128.2, 128.5, 128.6, 128.8, 135.7, 136.5, 138.9, 174.2 ppm; HRMS (ESI)  $m/z$  calcd. for  $C_{30}H_{29}N_2O_4$   $[M+H]^+$ : 481.2122, found: 481.2121.

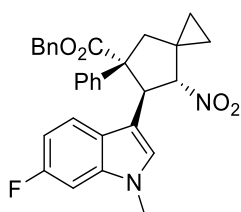

**Benzyl(5R,6S,7R)-6-(6-fluoro-1-methyl-1H-indol-3-yl)-7-nitro-5-phenylspiro[2.4]heptane-5-carboxylate (3b)**

Colorless oil, 27 mg, 54% yield; dr = 2 : 1, 88% ee;  $[\alpha]_D^{20.0} = -1.9$  (0.1,  $CH_2Cl_2$ ); [Daicel CHIRALPAK® IA-U (0.46 cm  $\times$  25 cm), *n*-hexane/2-propanol = 95/5,  $v = 1$  mL  $\cdot$  min $^{-1}$ ,  $\lambda = 254$  nm, t (major) = 15.2 min, t (minor) = 18.6 min];  $^1H$  NMR (400 MHz,  $CDCl_3$ )

$\delta$  0.72 – 0.79 (m, 1H), 0.83 – 0.89 (m, 1H), 1.09-1.13 (m, 1H), 1.16-1.20 (m, 1H), 2.61 (d,  $J = 13.8$  Hz, 1H), 2.91 (d,  $J = 13.8$  Hz, 1H), 3.49 (s, 3H), 4.96-5.03 (m, 2H), 5.18 (d,  $J = 12.4$  Hz, 1H), 5.29 (d,  $J = 8.0$  Hz, 1H), 6.08 (s, 1H), 6.49 – 6.59 (m, 1H), 6.70 (td,  $J = 9.2, 2.4$  Hz, 1H), 6.78 – 6.84 (m, 1H), 7.02 (dd,  $J = 7.2, 1.8$  Hz, 2H), 7.12 – 7.18 (m, 5H), 7.25 – 7.30 (m, 3H) ppm;  $^{13}\text{C}$  NMR (100 MHz,  $\text{CDCl}_3$ )  $\delta$  14.4, 17.6, 23.1, 32.8, 44.5, 50.2, 60.7, 67.0, 95.3 (d,  $J = 26.0$  Hz), 97.3, 108.0 (d,  $J = 24.2$  Hz), 109.2, 120.7 (d,  $J = 10.0$  Hz), 126.9, 127.5, 127.9, 128.2, 128.3 (d,  $J = 2.3$  Hz), 128.4, 128.5, 128.6, 135.7, 136.5 (d,  $J = 11.9$  Hz), 138.8, 159.7 (d,  $J = 236.3$  Hz), 174.1 ppm; HRMS (ESI)  $m/z$  calcd. for  $\text{C}_{30}\text{H}_{28}\text{FN}_2\text{O}_4$   $[\text{M}+\text{H}]^+$ : 499.2028, found: 499.2023.

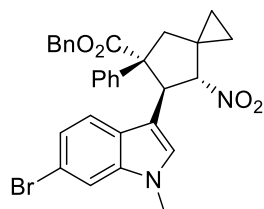

**Benzyl(5R,6S,7R)-6-(6-bromo-1-methyl-1H-indol-3-yl)-7-nitro-5-phenylspiro[2.4]heptane-5-carboxylate (3c)**

Colorless oil, 36 mg, 65% yield; dr = 5 : 1, 94% ee;  $[\alpha]_{\text{D}}^{20.0} = -18.8$  (0.1,  $\text{CH}_2\text{Cl}_2$ ); [Daicel CHIRALPAK® IA-U (0.46 cm  $\times$  25 cm), *n*-hexane/2-propanol = 97/3,  $v = 1$  mL  $\cdot$  min $^{-1}$ ,  $\lambda = 254$  nm,  $t$  (major) = 22.0 min,  $t$  (minor) = 25.6 min];  $^1\text{H}$  NMR (400 MHz,  $\text{CDCl}_3$ )  $\delta$  0.74-0.79 (m, 1H), 0.85-0.89 (m, 1H), 1.07-1.14 (m, 1H), 1.17-1.22 (m, 1H), 2.61 (d,  $J = 13.8$  Hz, 1H), 2.91 (d,  $J = 13.8$  Hz, 1H), 3.51 (s, 3H), 4.97-5.03 (m, 2H), 5.17 (d,  $J = 12.4$  Hz, 1H), 5.28 (d,  $J = 10.4$  Hz, 1H), 6.07 (s, 1H), 7.00-7.04 (t,  $J = 8.4$  Hz, 3H), 7.07-7.09 (d,  $J = 8.6$  Hz, 1H), 7.14 – 7.19 (m, 4H), 7.23 (d,  $J = 7.4$  Hz, 1H), 7.27-7.28 (m, 2H), 7.33-7.34 (m, 2H) ppm;  $^{13}\text{C}$  NMR (100 MHz,  $\text{CDCl}_3$ )  $\delta$  14.5, 17.5, 23.1, 32.8, 44.5, 50.1, 60.6, 67.1, 97.1, 109.3, 112.1, 115.2, 121.1, 122.5, 126.7, 126.9, 127.5, 127.9, 128.2, 128.3, 128.5, 129.5, 135.6, 137.3, 138.8, 174.1 ppm; HRMS (ESI)  $m/z$  calcd. for  $\text{C}_{30}\text{H}_{28}\text{BrN}_2\text{O}_4$   $[\text{M}+\text{H}]^+$ : 559.1227, found: 559.1224.

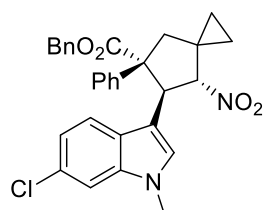

**Benzyl(5R,6S,7R)-6-(6-chloro-1-methyl-1H-indol-3-yl)-7-nitro-5-phenylspiro[2.4]heptane-5-carboxylate (3d)**

Colorless oil, 35 mg, 68% yield; dr = 5 : 1, 93% ee;  $[\alpha]_D^{20.0} = -22.7$  (0.1, CH<sub>2</sub>Cl<sub>2</sub>); [Daicel CHIRALPAK® IA-U (0.46 cm × 25 cm), *n*-hexane/2-propanol = 95/5, v = 1 mL·min<sup>-1</sup>, λ = 254 nm, t (major) = 15.2 min, t (minor) = 17.2 min]; <sup>1</sup>H NMR (400 MHz, CDCl<sub>3</sub>) δ 0.73-0.79 (m, 1H), 0.85-0.90 (m, 1H), 1.09-1.14 (m, 1H), 1.16-1.22 (m, 1H), 2.61 (d, *J* = 13.8 Hz, 1H), 2.90 (d, *J* = 13.8 Hz, 1H), 3.49 (s, 3H), 4.96-5.04 (m, 2H), 5.17 (d, *J* = 12.2 Hz, 1H), 5.28 (d, *J* = 10.2 Hz, 1H), 6.09 (s, 1H), 6.88-6.91 (dd, *J* = 8.5, 2.0 Hz, 1H), 7.01 (d, *J* = 7.6 Hz, 2H), 7.13 – 7.17 (m, 5H), 7.24-7.29 (m, 5H) ppm; <sup>13</sup>C NMR (100 MHz, CDCl<sub>3</sub>) δ 14.5, 17.5, 23.1, 32.8, 44.5, 50.1, 60.6, 67.1, 97.1, 109.1, 109.2, 120.0, 120.8, 126.4, 126.9, 127.5, 127.9, 128.2, 128.3, 128.4, 128.5, 129.5, 135.6, 136.9, 138.8, 174.1 ppm; HRMS (ESI) *m/z* calcd. for C<sub>30</sub>H<sub>28</sub>ClN<sub>2</sub>O<sub>4</sub> [M+H]<sup>+</sup>: 515.1732, found: 515.1736.

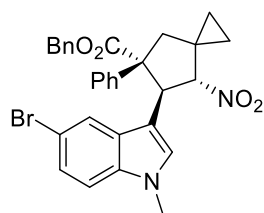

**Benzyl(5R,6S,7R)-6-(5-bromo-1-methyl-1H-indol-3-yl)-7-nitro-5-phenylspiro[2.4]heptane-5-carboxylate (3e)**

Colorless oil, 41mg, 73% yield; dr = 4 : 1, 91% ee;  $[\alpha]_D^{20.0} = -2.2$  (0.1, CH<sub>2</sub>Cl<sub>2</sub>); [Daicel CHIRALPAK® IA-U (0.46 cm × 25 cm), *n*-hexane/2-propanol = 95/5, v = 1 mL·min<sup>-1</sup>, λ = 254 nm, t (major) = 16.8 min, t (minor) = 16.1 min]; <sup>1</sup>H NMR (400 MHz, CDCl<sub>3</sub>) δ 0.74-0.79 (m, 1H), 0.85-0.91 (m, 1H), 1.13-1.23 (m, 2H), 2.60 (d, *J* = 13.8 Hz, 1H), 2.89 (d, *J* = 13.8 Hz, 1H), 3.54 (s, 3H), 5.03 (dd, *J* = 14.6, 11.4 Hz, 2H), 5.19 (d, *J* = 14.0 Hz, 1H), 5.22 (d, *J* = 8.8 Hz, 1H), 6.26 (s, 1H), 7.00 – 7.08 (m, 5H), 7.15 – 7.20 (m, 5H), 7.26-7.29 (m, 3H) ppm; <sup>13</sup>C NMR (100 MHz, CDCl<sub>3</sub>) δ 14.5, 17.7, 23.1, 32.9, 44.5, 50.5, 60.5, 67.0, 96.7, 108.5, 110.5, 112.8, 122.4, 124.3, 126.9, 127.7, 128.0, 128.2, 128.3, 128.5, 129.2, 130.4, 135.2, 135.6, 138.7, 174.1 ppm; HRMS (ESI) *m/z* calcd. for C<sub>30</sub>H<sub>28</sub>BrN<sub>2</sub>O<sub>4</sub> [M+H]<sup>+</sup>: 559.1227, found: 559.1231.

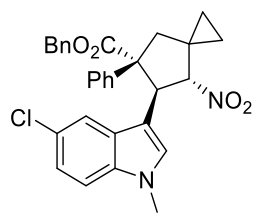

**Benzyl(5R,6S,7R)-6-(5-chloro-1-methyl-1H-indol-3-yl)-7-nitro-5-phenylspiro[2.4]heptane-5-carboxylate (3f)**

Colorless oil, 37 mg, 72% yield; dr = 3 : 1, 91% ee;  $[\alpha]_{\text{D}}^{20.0} = -1.9$  (0.1, CH<sub>2</sub>Cl<sub>2</sub>); [Daicel CHIRALPAK® IB-U (0.46 cm × 25 cm), *n*-hexane/2-propanol = 95/5,  $\nu = 1 \text{ mL} \cdot \text{min}^{-1}$ ,  $\lambda = 254 \text{ nm}$ , t (major) = 11.6 min, t (minor) = 10.3 min]; <sup>1</sup>H NMR (400 MHz, CDCl<sub>3</sub>)  $\delta$  0.74-0.80 (m, 1H), 0.87-0.91 (m, 1H), 1.13-1.24 (m, 2H), 2.61 (d, *J* = 13.8 Hz, 1H), 2.90 (d, *J* = 13.8 Hz, 1H), 3.55 (s, 3H), 5.03 (dd, *J* = 13.8, 11.4 Hz, 2H), 5.19 (d, *J* = 12.3 Hz, 1H), 5.23 (d, *J* = 10.6 Hz, 1H), 6.26 (s, 1H), 6.96 (s, 1H), 7.01-7.06 (m, 4H), 7.15-7.19 (m, 4H), 7.27-7.31 (m, 4H) ppm; <sup>13</sup>C NMR (100 MHz, CDCl<sub>3</sub>)  $\delta$  14.5, 17.7, 23.1, 32.9, 44.5, 50.4, 60.6, 67.0, 96.8, 108.5, 110.1, 119.3, 121.8, 125.2, 126.9, 127.7, 128.0, 128.2, 128.3, 128.4, 128.5, 130.5, 135.0, 135.7, 138.8, 174.1 ppm; HRMS (ESI) *m/z* calcd. for C<sub>30</sub>H<sub>28</sub>ClN<sub>2</sub>O<sub>4</sub> [M+H]<sup>+</sup>: 515.1732, found: 515.1737.

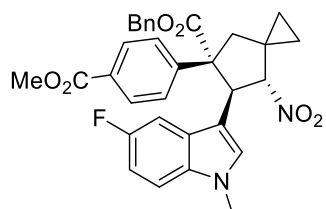

**Benzyl(5R,6S,7R)-6-(5-fluoro-1-methyl-1H-indol-3-yl)-5-(4-(methoxycarbonyl)phenyl)-7-nitrospiro[2.4]heptane-5-carboxylate (3g)**

Colorless oil, 35 mg, 63% yield; dr = 4 : 1, 92% ee;  $[\alpha]_{\text{D}}^{20.0} = -45.7$  (0.1, CH<sub>2</sub>Cl<sub>2</sub>); [Daicel CHIRALPAK® IA-U (0.46 cm × 25 cm), *n*-hexane/2-propanol = 90/10,  $\nu = 1 \text{ mL} \cdot \text{min}^{-1}$ ,  $\lambda = 254 \text{ nm}$ , t (major) = 16.2 min, t (minor) = 13.8 min]; <sup>1</sup>H NMR (400 MHz, CDCl<sub>3</sub>)  $\delta$  0.75-0.81 (m, 1H), 0.86-0.93 (m, 1H), 1.10-1.16 (m, 1H), 1.17-1.22 (m, 1H), 2.62 (d, *J* = 13.8 Hz, 1H), 2.95 (d, *J* = 13.8 Hz, 1H), 3.54 (s, 3H), 3.90 (s, 3H), 4.93 (d, *J* = 10.0 Hz, 1H), 5.04 (d, *J* = 12.2 Hz, 1H), 5.17 (d, *J* = 12.2 Hz, 1H), 5.32 (d, *J* = 10.0

Hz, 1H), 6.20 (s, 1H), 6.87 (td,  $J = 9.0, 2.5$  Hz, 1H), 6.94 (dd,  $J = 10.2, 2.4$  Hz, 1H), 7.08 (dd,  $J = 8.5, 5.7$  Hz, 3H), 7.15 (dd,  $J = 6.6, 3.0$  Hz, 2H), 7.27 (dd,  $J = 6.3, 3.0$  Hz, 3H), 7.81 (d,  $J = 8.0$  Hz, 2H) ppm;  $^{13}\text{C}$  NMR (100 MHz,  $\text{CDCl}_3$ )  $\delta$  14.3, 17.6, 23.1, 33.1, 44.3, 50.2, 52.3, 61.0, 67.4, 96.9, 104.6 (d,  $J = 24.0$  Hz), 108.7 (d,  $J = 4.8$  Hz), 109.8 (d,  $J = 9.8$  Hz), 110.2 (d,  $J = 26.2$  Hz), 127.9 (d,  $J = 9.9$  Hz), 128.3, 128.4, 128.5, 128.6, 129.0, 129.2, 130.1, 133.2, 135.3, 143.9, 157.8 (d,  $J = 233.0$  Hz), 166.7, 173.5 ppm; HRMS (ESI)  $m/z$  calcd. for  $\text{C}_{32}\text{H}_{30}\text{FN}_2\text{O}_6$   $[\text{M}+\text{H}]^+$ : 557.2082, found: 557.2080.

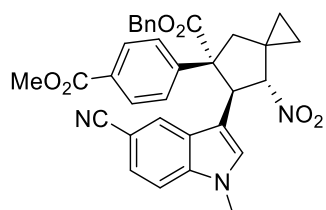

**Benzyl(5R,6S,7R)-6-(5-cyano-1-methyl-1H-indol-3-yl)-5-(4-(methoxycarbonyl)phenyl)-7-nitrospiro[2.4]heptane-5-carboxylate (3h)**

Colorless oil, 38 mg, 67% yield; dr = 4 : 1, 86% ee;  $[\alpha]_{\text{D}}^{20.0} = -51.3$  (0.1,  $\text{CH}_2\text{Cl}_2$ ); [Daicel CHIRALPAK® IA-U (0.46 cm  $\times$  25 cm), *n*-hexane/2-propanol = 80/20,  $v = 1$  mL  $\cdot$  min $^{-1}$ ,  $\lambda = 254$  nm,  $t$  (major) = 17.1 min,  $t$  (minor) = 13.9 min];  $^1\text{H}$  NMR (400 MHz,  $\text{CDCl}_3$ )  $\delta$  0.78-0.83 (m, 1H), 0.86-0.93 (m, 1H), 1.14-1.24 (m, 2H), 2.62 (d,  $J = 14.0$  Hz, 1H), 2.92 (d,  $J = 14.0$  Hz, 1H), 3.59 (s, 3H), 3.93 (s, 3H), 4.95 (d,  $J = 10.8$  Hz, 1H), 5.04 (d,  $J = 12.2$  Hz, 1H), 5.17 (d,  $J = 12.2$  Hz, 1H), 5.31 (d,  $J = 10.0$  Hz, 1H), 6.33 (s, 1H), 7.06 (dd,  $J = 8.4, 1.4$  Hz, 2H), 7.15 (dd,  $J = 6.0, 3.0$  Hz, 2H), 7.21 (dd,  $J = 8.6, 1.4$  Hz, 1H), 7.26-7.30 (m, 3H), 7.34 (dt,  $J = 8.6, 1.4$  Hz, 1H), 7.47 (s, 1H), 7.78 – 7.89 (m, 2H) ppm;  $^{13}\text{C}$  NMR (100 MHz,  $\text{CDCl}_3$ )  $\delta$  14.5, 17.6, 23.0, 33.0, 44.3, 50.0, 52.3, 60.7, 67.4, 96.5, 102.7, 109.8, 110.1, 120.6, 124.6, 125.5, 127.2, 128.3, 128.4, 128.5, 128.6, 129.3, 129.6, 131.0, 135.2, 138.0, 143.6, 166.5, 173.3 ppm; HRMS (ESI)  $m/z$  calcd. for  $\text{C}_{33}\text{H}_{30}\text{N}_3\text{O}_6$   $[\text{M}+\text{H}]^+$ : 564.2129, found: 564.2126.

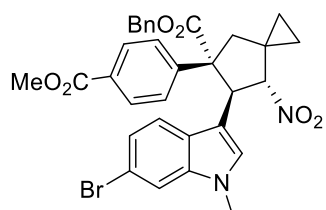



**Benzyl(5R,6S,7R)-6-(6-bromo-1-methyl-1H-indol-3-yl)-5-(4-(methoxycarbonyl)phenyl)-7-nitrospiro[2.4]heptane-5-carboxylate (3i)**

Colorless oil, 39 mg, 63% yield; dr = 6 : 1, 92% ee;  $[\alpha]_D^{20.0} = -69.7$  (0.1, CH<sub>2</sub>Cl<sub>2</sub>); [Daicel CHIRALPAK® IC-U (0.46 cm × 25 cm), *n*-hexane/2-propanol = 80/20,  $v = 1$  mL·min<sup>-1</sup>,  $\lambda = 254$  nm,  $t$  (major) = 16.9 min,  $t$  (minor) = 15.1 min]; <sup>1</sup>H NMR (400 MHz, CDCl<sub>3</sub>)  $\delta$  0.75-0.80 (m, 1H), 0.85-0.93 (m, 1H), 1.10-1.14 (m, 1H), 1.16-1.21 (m, 1H), 2.62 (d,  $J = 14.0$  Hz, 1H), 2.95 (d,  $J = 14.0$  Hz, 1H), 3.50 (s, 3H), 3.91 (s, 3H), 4.92 (d,  $J = 10.0$  Hz, 1H), 5.02 (d,  $J = 12.2$  Hz, 1H), 5.16 (d,  $J = 12.2$  Hz, 1H), 5.36 (d,  $J = 10.0$  Hz, 1H), 6.10 (s, 1H), 7.04 - 7.10 (m, 3H), 7.12 - 7.16 (m, 2H), 7.21 (d,  $J = 8.6$  Hz, 1H), 7.25 - 7.28 (m, 3H), 7.33 (d,  $J = 1.5$  Hz, 1H), 7.79 - 7.84 (m, 2H) ppm; <sup>13</sup>C NMR (100 MHz, CDCl<sub>3</sub>)  $\delta$  14.2, 17.5, 23.1, 32.9, 44.3, 49.9, 52.3, 61.0, 67.4, 97.1, 109.2, 112.3, 115.5, 121.0, 122.7, 126.5, 128.2, 128.5, 128.5, 128.6, 129.0, 129.1, 129.2, 135.3, 137.4, 143.8, 166.7, 173.5 ppm; HRMS (ESI)  $m/z$  calcd. for C<sub>32</sub>H<sub>30</sub>BrN<sub>2</sub>O<sub>6</sub> [M+H]<sup>+</sup>: 617.1282, found: 617.1287.

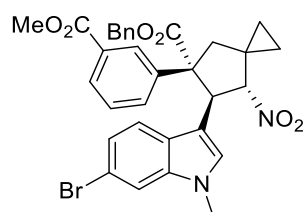

**Benzyl(5R,6S,7R)-6-(6-bromo-1-methyl-1H-indol-3-yl)-5-(3-(methoxycarbonyl)phenyl)-7-nitrospiro[2.4]heptane-5-carboxylate (3j)**

Colorless oil, 41 mg, 67% yield; dr = 6 : 1, 85% ee;  $[\alpha]_D^{20.0} = -75.2$  (0.1, CH<sub>2</sub>Cl<sub>2</sub>); [Daicel CHIRALPAK® IA-U (0.46 cm × 25 cm), *n*-hexane/2-propanol = 90/10,  $v = 1$  mL·min<sup>-1</sup>,  $\lambda = 254$  nm,  $t$  (major) = 16.1 min,  $t$  (minor) = 19.4 min]; <sup>1</sup>H NMR (400 MHz, CDCl<sub>3</sub>)  $\delta$  0.76-0.82 (m, 1H), 0.86-0.94 (m, 1H), 1.13-1.19 (m, 1H), 1.26-1.32 (m, 1H), 2.63 (d,  $J = 14.0$  Hz, 1H), 2.98 (d,  $J = 14.0$  Hz, 1H), 3.51 (s, 3H), 3.87 (s, 3H), 4.93 (d,  $J = 10.0$  Hz, 1H), 5.04 (d,  $J = 12.2$  Hz, 1H), 5.16 (d,  $J = 12.2$  Hz, 1H), 5.36 (d,  $J = 10.0$  Hz, 1H), 6.17 (s, 1H), 6.87 - 6.92 (m, 1H), 7.00 - 7.07 (m, 2H), 7.08 (d,  $J = 7.8$  Hz, 1H), 7.11 - 7.16 (m, 2H), 7.24 - 7.29 (m, 3H), 7.32 (d,  $J = 1.5$  Hz, 1H), 7.88 (dt,  $J = 7.8, 1.3$  Hz, 1H), 7.97 (d,  $J = 2.2$  Hz, 1H) ppm; <sup>13</sup>C NMR (100 MHz, CDCl<sub>3</sub>)  $\delta$  14.0, 17.9, 23.3,

32.8, 44.2, 50.3, 52.2, 52.3, 60.9, 97.1, 109.2, 112.2, 115.4, 121.0, 122.6, 126.4, 127.7, 128.2, 128.4, 128.5, 128.7, 128.9, 129.4, 129.9, 133.7, 135.4, 137.4, 138.9, 166.8, 173.6 ppm; HRMS (ESI)  $m/z$  calcd. for  $C_{32}H_{30}BrN_2O_6$   $[M+H]^+$ : 617.1282, found: 617.1281.

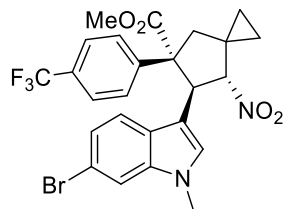

**Methyl(5R,6S,7R)-6-(6-bromo-1-methyl-1H-indol-3-yl)-7-nitro-5-(4-(trifluoromethyl)phenyl)spiro[2.4]heptane-5-carboxylate (3k)**

Colorless oil, 41 mg, 75% yield; dr = 5 : 1, 88% ee;  $[\alpha]_D^{20.0} = -39.8$  (0.1,  $CH_2Cl_2$ ); [Daicel CHIRALPAK® IA-U (0.46 cm × 25 cm), *n*-hexane/2-propanol = 95/5,  $v = 1$  mL·min<sup>-1</sup>,  $\lambda = 254$  nm, t (major) = 14.2 min, t (minor) = 13.5 min]; <sup>1</sup>H NMR (400 MHz,  $CDCl_3$ )  $\delta$  0.79-0.85 (m, 1H), 0.91-0.97 (m, 1H), 1.10-1.24 (m, 2H), 2.61 (d,  $J = 14.0$  Hz, 1H), 3.00 (d,  $J = 14.0$  Hz, 1H), 3.54 (s, 3H), 3.67 (s, 3H), 4.92 (d,  $J = 10.0$  Hz, 1H), 5.36 (d,  $J = 10.0$  Hz, 1H), 6.17 (s, 1H), 7.06 -7.18 (m, 4H), 7.35 (d,  $J = 1.8$  Hz, 1H), 7.38 – 7.46 (m, 2H) ppm; <sup>13</sup>C NMR (100 MHz,  $CDCl_3$ )  $\delta$  14.3, 17.8, 23.1, 32.8, 44.4, 50.2, 52.9, 60.9, 96.8, 108.9, 112.4, 115.6, 120.9, 122.8, 124.0 (q,  $J = 270.6$  Hz), 124.8 (q,  $J = 3.7$  Hz), 126.4, 128.8, 129.2, 129.9 (q,  $J = 32.5$  Hz), 137.4, 142.8, 174.2 ppm; HRMS (ESI)  $m/z$  calcd. for  $C_{25}H_{23}BrF_3N_2O_4$   $[M+H]^+$ : 551.0788, found: 551.0783.

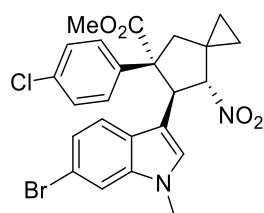

**Methyl(5R,6S,7R)-6-(6-bromo-1-methyl-1H-indol-3-yl)-5-(4-chlorophenyl)-7-nitrospiro[2.4]heptane-5-carboxylate (3l)**

Colorless oil, 26 mg, 51% yield; dr = 4 : 1, 80% ee;  $[\alpha]_D^{20.0} = -3.8$  (0.1,  $CH_2Cl_2$ ); [Daicel CHIRALPAK® IC-U (0.46 cm × 25 cm), *n*-hexane/2-propanol = 90/10,  $v = 1$  mL·min<sup>-1</sup>,  $\lambda = 254$  nm, t (major) = 9.3 min, t (minor) = 10.8 min]; <sup>1</sup>H NMR (400 MHz,  $CDCl_3$ )  $\delta$  0.76-0.82 (m, 1H), 0.89-0.93 (m, 1H), 1.09-1.14 (m, 1H), 1.16-1.21 (m, 1H), 2.56 (d,

$J = 14.0$  Hz, 1H), 2.96 (d,  $J = 14.0$  Hz, 1H), 3.56 (s, 3H), 3.65 (s, 3H), 4.91 (d,  $J = 10.0$  Hz, 1H), 5.32 (d,  $J = 10.0$  Hz, 1H), 6.18 (s, 1H), 6.90 -6.97 (m, 2H), 7.14 (td,  $J = 8.6, 1.8$  Hz, 3H), 7.24 (d,  $J = 8.5$  Hz, 1H), 7.36 (d,  $J = 1.7$  Hz, 1H) ppm;  $^{13}\text{C}$  NMR (100 MHz,  $\text{CDCl}_3$ )  $\delta$  14.3, 17.6, 23.0, 32.9, 44.5, 50.0, 52.8, 60.4, 96.9, 109.2, 112.3, 115.5, 121.0, 122.7, 126.6, 128.1, 129.2, 129.8, 133.7, 137.2, 137.4, 174.4 ppm; HRMS (ESI)  $m/z$  calcd. for  $\text{C}_{24}\text{H}_{23}\text{BrClN}_2\text{O}_4$   $[\text{M}+\text{H}]^+$ : 517.0524, found: 517.0528.

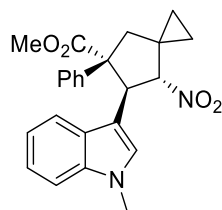

**Methyl(5R,6S,7R)-6-(1-methyl-1H-indol-3-yl)-7-nitro-5-phenylspiro[2.4]heptane-5-carboxylate (3m)**

White solid, m.p. = 55 - 57 °C; 23 mg, 57% yield; dr = 12 : 1, 87% ee;  $[\alpha]_{\text{D}}^{20.0} = -4.8$  (0.1,  $\text{CH}_2\text{Cl}_2$ ); [Daicel CHIRALPAK® IB-U (0.46 cm × 25 cm), *n*-hexane/2-propanol = 95/5,  $v = 1$  mL·min<sup>-1</sup>,  $\lambda = 254$  nm, t (major) = 8.5 min, t (minor) = 8.2 min];  $^1\text{H}$  NMR (400 MHz,  $\text{CDCl}_3$ )  $\delta$  0.77-0.82 (m, 1H), 0.89-0.95 (m, 1H), 1.09-1.16 (m, 1H), 1.18-1.23 (m, 1H), 2.63 (d,  $J = 13.8$  Hz, 1H), 2.98 (d,  $J = 13.8$  Hz, 1H), 3.56 (s, 3H), 3.66 (s, 3H), 5.01 (d,  $J = 10.0$  Hz, 1H), 5.39 (d,  $J = 10.0$  Hz, 1H), 6.10 (s, 1H), 6.98 -7.07 (m, 3H), 7.11-7.24 (m, 5H), 7.37 (d,  $J = 8.0$  Hz, 1H) ppm;  $^{13}\text{C}$  NMR (100 MHz,  $\text{CDCl}_3$ )  $\delta$  14.3, 17.6, 23.0, 32.9, 44.5, 50.0, 52.8, 60.4, 96.9, 109.2, 112.3, 115.5, 121.0, 122.7, 126.6, 128.0, 129.2, 129.8, 133.6, 137.2, 137.4, 174.4 ppm; HRMS (ESI)  $m/z$  calcd. for  $\text{C}_{24}\text{H}_{25}\text{N}_2\text{O}_4$   $[\text{M}+\text{H}]^+$ : 405.1809, found: 405.1811.

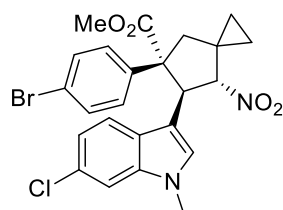

**Methyl(5R,6S,7R)-5-(4-bromophenyl)-6-(6-chloro-1-methyl-1H-indol-3-yl)-7-nitrospiro[2.4]heptane-5-carboxylate (3n)**

Colorless oil, 27 mg, 52% yield; dr = 5 : 1, 87% ee;  $[\alpha]_{\text{D}}^{20.0} = -3.1$  (0.1,  $\text{CH}_2\text{Cl}_2$ ); [Daicel

CHIRALPAK® IC-U (0.46 cm × 25 cm), *n*-hexane/2-propanol = 90/10,  $v = 1 \text{ mL} \cdot \text{min}^{-1}$ ,  $\lambda = 254 \text{ nm}$ ,  $t$  (major) = 9.5 min,  $t$  (minor) = 10.9 min];  $^1\text{H NMR}$  (400 MHz,  $\text{CDCl}_3$ )  $\delta$  0.76-0.81 (m, 1H), 0.88-0.93 (m, 1H), 1.09-1.14 (m, 1H), 1.16-1.21 (m, 1H), 2.55 (d,  $J = 14.0 \text{ Hz}$ , 1H), 2.95 (d,  $J = 14.0 \text{ Hz}$ , 1H), 3.57 (s, 3H), 3.65 (s, 3H), 4.91 (d,  $J = 10.0 \text{ Hz}$ , 1H), 5.31 (d,  $J = 10.0 \text{ Hz}$ , 1H), 6.21 (s, 1H), 6.87 (dd,  $J = 8.9, 2.5 \text{ Hz}$ , 2H), 7.00 (dd,  $J = 8.6, 1.9 \text{ Hz}$ , 1H), 7.17 – 7.25 (m, 2H), 7.27 – 7.33 (m, 2H) ppm;  $^{13}\text{C NMR}$  (100 MHz,  $\text{CDCl}_3$ )  $\delta$  14.3, 17.7, 23.0, 32.9, 44.4, 50.0, 52.8, 60.5, 96.9, 109.1, 109.3, 120.2, 120.7, 121.8, 126.2, 127.9, 129.3, 130.2, 131.0, 137.0, 137.7, 174.4 ppm; HRMS (ESI)  $m/z$  calcd. for  $\text{C}_{24}\text{H}_{23}\text{BrClN}_2\text{O}_4$   $[\text{M}+\text{H}]^+$ : 517.0524, found: 517.0525.

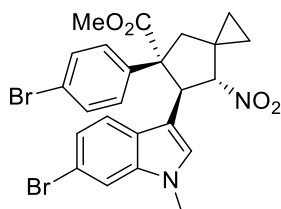

**Methyl(5R,6S,7R)-6-(6-bromo-1-methyl-1H-indol-3-yl)-5-(4-bromophenyl)-7-nitrospiro[2.4]heptane-5-carboxylate (3o)**

Colorless oil, 29mg, 52% yield; dr = 4 : 1, 87% ee;  $[\alpha]_{\text{D}}^{20.0} = -37.1$  (0.1,  $\text{CH}_2\text{Cl}_2$ ); [Daicel CHIRALPAK® IC-U (0.46 cm × 25 cm), *n*-hexane/2-propanol = 90/10,  $v = 1 \text{ mL} \cdot \text{min}^{-1}$ ,  $\lambda = 254 \text{ nm}$ ,  $t$  (major) = 9.6 min,  $t$  (minor) = 11.2 min];  $^1\text{H NMR}$  (400 MHz,  $\text{CDCl}_3$ )  $\delta$  0.70-0.76 (m, 1H), 0.83-0.88 (m, 1H), 1.02-1.08 (m, 1H), 1.10-1.15 (m, 1H), 2.49 (d,  $J = 13.8 \text{ Hz}$ , 1H), 2.90 (d,  $J = 13.8 \text{ Hz}$ , 1H), 3.51 (s, 3H), 3.59 (s, 3H), 4.85 (d,  $J = 10.0 \text{ Hz}$ , 1H), 5.26 (d,  $J = 10.0 \text{ Hz}$ , 1H), 6.12 (s, 1H), 6.81 (d,  $J = 8.6 \text{ Hz}$ , 2H), 7.08 (dd,  $J = 8.6, 1.7 \text{ Hz}$ , 1H), 7.18 (d,  $J = 8.6 \text{ Hz}$ , 1H), 7.20 – 7.26 (m, 2H) 7.30 (d,  $J = 1.7 \text{ Hz}$ , 1H) ppm;  $^{13}\text{C NMR}$  (100 MHz,  $\text{CDCl}_3$ )  $\delta$  14.3, 17.6, 23.0, 32.9, 44.5, 50.0, 52.8, 60.5, 97.0, 109.2, 112.4, 115.6, 121.0, 121.8, 122.8, 126.6, 129.2, 130.2, 131.0, 137.4, 137.8, 174.4 ppm; HRMS (ESI)  $m/z$  calcd. for  $\text{C}_{24}\text{H}_{23}\text{Br}_2\text{N}_2\text{O}_4$   $[\text{M}+\text{H}]^+$ : 561.0019, found: 561.0019.

## 4. Representative procedure and data for the synthesis of 5

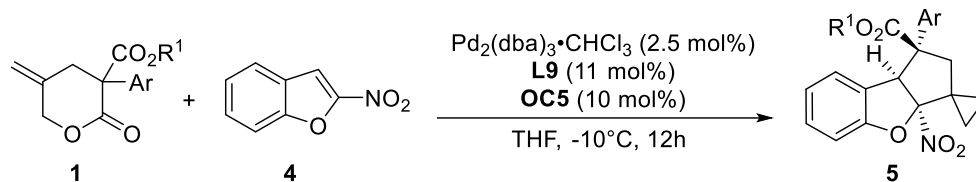

To a dried tube was added  $\gamma$ -methylidene- $\delta$ -valerolactone **1** (0.24 mmol, 1.2 equiv.), 2-nitrobenzofuran **4** (0.2 mmol, 1.0 equiv.),  $\text{Pd}_2(\text{dba})_3 \cdot \text{CHCl}_3$  (0.005 mmol, 5.2 mg, 2.5 mol%), **L9** (0.022 mmol, 13.4 mg, 11 mol%), **OC5** (0.02 mmol, 8.8 mg, 10 mol%) followed with 1 mL of THF under nitrogen atmosphere. The reaction mixture was stirred at  $-10^\circ\text{C}$  for 12 h and directly purified by silica gel chromatography (hexane/ethyl acetate = 30:1-5:1) to yield the products.

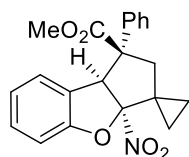

### Methyl(1S,3aS)-3a-nitro-1-phenyl-1,2,3a,8b-tetrahydrospiro[cyclopenta[b]benzofuran-3,1'-cyclopropane]-1-carboxylate (**5a**)

White solid, m.p. =  $49 - 51^\circ\text{C}$ ; 62 mg, 85% yield; dr = 7 : 1, 97% ee;  $[\alpha]_{\text{D}}^{20.0} = -58.0$  (0.1,  $\text{CH}_2\text{Cl}_2$ ); [Daicel CHIRALPAK® IC-U (0.46 cm  $\times$  25 cm), *n*-hexane/2-propanol = 95/5,  $v = 1 \text{ mL} \cdot \text{min}^{-1}$ ,  $\lambda = 254 \text{ nm}$ , t (major) = 10.9 min, t (minor) = 12.7 min];  $^1\text{H}$  NMR (400 MHz,  $\text{CDCl}_3$ )  $\delta$  0.70-0.82 (m, 2H), 0.97 (dt,  $J = 9.3, 6.1 \text{ Hz}$ , 1H), 1.48 (dt,  $J = 11.2, 6.2 \text{ Hz}$ , 1H), 2.72 (d,  $J = 13.0 \text{ Hz}$ , 1H), 2.99 (d,  $J = 13.0 \text{ Hz}$ , 1H), 3.30 (s, 3H), 5.19 (s, 1H), 7.03 (d,  $J = 7.8 \text{ Hz}$ , 2H), 7.28 – 7.33 (m, 2H), 7.36 (t,  $J = 13.0 \text{ Hz}$ , 1H), 7.42 – 7.51 (m, 4H) ppm;  $^{13}\text{C}$  NMR (100 MHz,  $\text{CDCl}_3$ )  $\delta$  11.1, 15.0, 29.8, 47.6, 52.0, 62.5, 62.6, 110.6, 122.7, 124.7, 126.0, 126.6, 126.9, 127.8, 129.0, 129.9, 141.4, 159.3, 172.7 ppm; HRMS (ESI)  $m/z$  calcd. for  $\text{C}_{21}\text{H}_{20}\text{NO}_5$   $[\text{M}+\text{H}]^+$ : 366.1336, found: 366.1337.

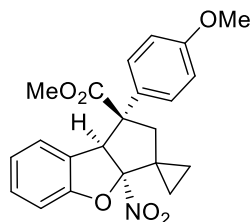

**Methyl(1S,3aS)-1-(4-methoxyphenyl)-3a-nitro-1,2,3a,8b-tetrahydrospiro[cyclopenta[b]benzofuran-3,1'-cyclopropane]-1-carboxylate (5b)**

Colorless oil, 40 mg, 51% yield; dr = 5 : 1, 84% ee;  $[\alpha]_{\text{D}}^{20.0} = -84.6$  (0.1,  $\text{CH}_2\text{Cl}_2$ ); [Daicel CHIRALPAK® IC-U(0.3 cm × 10 cm), *n*-hexane/2-propanol = 97/3,  $v = 0.3 \text{ mL} \cdot \text{min}^{-1}$ ,  $\lambda = 254 \text{ nm}$ ,  $t$  (major) = 8.2 min,  $t$  (minor) = 11.6 min];  $^1\text{H NMR}$  (400 MHz,  $\text{CDCl}_3$ )  $\delta$  0.68-0.81 (m, 2H), 0.91 - 0.98 (m, 1H), 1.40 - 1.50 (m, 1H), 2.69 (d,  $J = 13.0$  Hz, 1H), 2.95 (d,  $J = 13.0$  Hz, 1H), 3.31 (s, 3H), 3.85 (s, 3H), 5.14 (s, 1H), 6.94 - 6.99 (m, 2H), 7.03 (d,  $J = 7.8$  Hz, 2H), 7.24 - 7.32 (m, 2H), 7.37 - 7.43 (m, 2H) ppm;  $^{13}\text{C NMR}$  (100 MHz,  $\text{CDCl}_3$ )  $\delta$  11.1, 14.7, 29.8, 47.5, 51.9, 55.4, 61.9, 62.9, 110.6, 114.3, 122.6, 124.8, 125.9, 126.9, 127.7, 129.8, 133.4, 159.0, 159.3, 172.8 ppm; HRMS (ESI)  $m/z$  calcd. for  $\text{C}_{22}\text{H}_{22}\text{NO}_6$   $[\text{M}+\text{H}]^+$ : 396.1442, found: 396.1447.

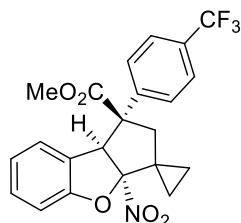

**Methyl(1S,3aS)-3a-nitro-1-(4-(trifluoromethyl)phenyl)-1,2,3a,8b-tetrahydrospiro[cyclopenta[b]benzofuran-3,1'-cyclopropane]-1-carboxylate (5c)**

Colorless oil, 54 mg, 63% yield; dr = 4 : 1, 87% ee;  $[\alpha]_{\text{D}}^{20.0} = -101.5$  (0.1,  $\text{CH}_2\text{Cl}_2$ ); [Daicel CHIRALPAK® IA-U (0.46 cm × 25 cm), *n*-hexane/2-propanol = 95/5,  $v = 1 \text{ mL} \cdot \text{min}^{-1}$ ,  $\lambda = 254 \text{ nm}$ ,  $t$  (major) = 8.4 min,  $t$  (minor) = 7.6 min];  $^1\text{H NMR}$  (400 MHz,  $\text{CDCl}_3$ )  $\delta$  0.69-0.81 (m, 2H), 0.91 - 0.98 (m, 1H), 1.40 - 1.50 (m, 1H), 2.77 (d,  $J = 13.0$  Hz, 1H), 2.92 (d,  $J = 13.0$  Hz, 1H), 3.31 (s, 3H), 5.21 (s, 1H), 7.05 (d,  $J = 7.6$  Hz, 2H), 7.30 (d,  $J = 8.4$  Hz, 2H), 7.63 (d,  $J = 8.2$  Hz, 2H), 7.72 (d,  $J = 8.2$  Hz, 2H) ppm;  $^{13}\text{C NMR}$  (100 MHz,  $\text{CDCl}_3$ )  $\delta$  11.4, 14.7, 29.8, 47.4, 52.2, 62.3, 62.6, 110.8, 122.8, 125.3 (q,  $J = 240.1$  Hz), 125.8, 126.0 (q,  $J = 3.8$  Hz), 127.2, 127.7, 129.0, 130.1 (q,  $J = 32.6$

Hz), 130.2, 145.4, 159.2, 171.9 ppm; HRMS (ESI)  $m/z$  calcd. for  $C_{22}H_{19}F_3NO_5$   $[M+H]^+$ : 434.1210, found: 434.1208.

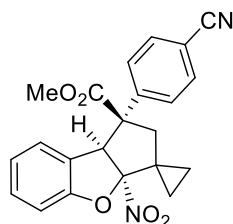

**Methyl(1S,3aS)-1-(4-cyanophenyl)-3a-nitro-1,2,3a,8b-tetrahydrospiro[cyclopenta[b]benzofuran-3,1'-cyclopropane]-1-carboxylate (5d)**

Colorless oil, 43mg, 55% yield; dr = 3 : 1, 80% ee;  $[\alpha]_D^{20.0} = -100.4$  (0.1,  $CH_2Cl_2$ ); [Daicel CHIRALPAK® IC-U(0.46 cm  $\times$  25 cm), n-hexane/2-propanol = 83/17,  $v = 1$  mL  $\cdot$  min $^{-1}$ ,  $\lambda = 254$  nm, t (major) = 29.3 min, t (minor) = 24.7 min];  $^1H$  NMR (400 MHz,  $CDCl_3$ )  $\delta$  0.70-0.82 (m, 2H), 1.00 (dt,  $J = 13.1, 6.4$  Hz, 1H), 1.45 -1.55 (m, 1H), 2.79 (d,  $J = 13.0$  Hz, 1H), 2.89 (d,  $J = 13.0$  Hz, 1H), 3.33 (s, 3H), 5.22 (s, 1H), 7.04 - 7.08 (m, 2H), 7.28 - 7.39 (m, 2H), 7.65 (d,  $J = 8.2$  Hz, 2H), 7.77 (d,  $J = 8.1$  Hz, 2H) ppm;  $^{13}C$  NMR (100 MHz,  $CDCl_3$ )  $\delta$  11.5, 14.6, 29.8, 47.2, 52.3, 62.0, 62.7, 110.8, 111.9, 118.3, 122.8, 123.8, 125.7, 126.4, 127.6, 130.2, 132.7, 146.7, 159.1, 171.5 ppm; HRMS (ESI)  $m/z$  calcd. for  $C_{22}H_{19}N_2O_5$   $[M+H]^+$ : 391.1288, found: 391.1288.

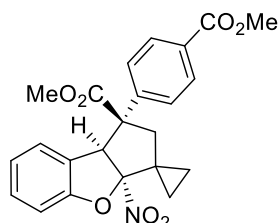

**Methyl(1S,3aS)-1-(4-(methoxycarbonyl)phenyl)-3a-nitro-1,2,3a,8b-tetrahydrospiro[cyclopenta[b]benzofuran-3,1'-cyclopropane]-1-carboxylate (5e)**

Colorless oil, 65mg, 77% yield; dr = 5 : 1, 83% ee;  $[\alpha]_D^{20.0} = -67.2$  (0.1,  $CH_2Cl_2$ ); [Daicel CHIRALPAK® IA-U(0.46 cm  $\times$  25 cm), n-hexane/2-propanol = 93/7,  $v = 1$  mL  $\cdot$  min $^{-1}$ ,  $\lambda = 254$  nm, t (major) = 16.5 min, t (minor) = 19.0 min];  $^1H$  NMR (400 MHz,  $CDCl_3$ )  $\delta$  0.70-0.80 (m, 2H), 0.94 - 1.02 (m, 1H), 1.44 - 1.52 (m, 1H), 2.76 (d,  $J = 13.0$  Hz, 1H), 2.93 (d,  $J = 13.0$  Hz, 1H), 3.30 (s, 3H), 3.94 (s, 3H), 5.23 (s, 1H), 7.04 (q,  $J = 6.9$  Hz, 2H), 7.28 (d,  $J = 8.2$  Hz, 2H), 7.58 (d,  $J = 8.2$  Hz, 2H), 8.12 (d,  $J = 8.1$  Hz, 2H) ppm;

$^{13}\text{C}$  NMR (100 MHz,  $\text{CDCl}_3$ )  $\delta$  11.3, 14.7, 29.8, 47.3, 52.1, 52.3, 62.2, 62.6, 110.7, 122.7, 124.2, 125.8, 126.6, 126.7, 127.3, 130.0, 130.2, 146.3, 159.1, 166.5, 172.0 ppm; HRMS (ESI)  $m/z$  calcd. for  $\text{C}_{23}\text{H}_{22}\text{NO}_7$   $[\text{M}+\text{H}]^+$ : 424.1391, found: 424.1392.

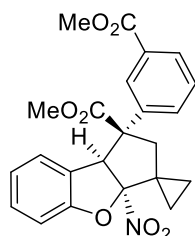

**Methyl(1S,3aS)-1-(3-(methoxycarbonyl)phenyl)-3a-nitro-1,2,3a,8b-tetrahydro spiro[cyclopenta[b]benzofuran-3,1'-cyclopropane]-1-carboxylate (5f)**

Colorless oil, 70 mg, 83% yield; dr = 3 : 1, 71% ee;  $[\alpha]_{\text{D}}^{20.0} = -120.7$  (0.1,  $\text{CH}_2\text{Cl}_2$ ); [Daicel CHIRALPAK® IB-U(0.46 cm  $\times$  25 cm), n-hexane/2-propanol = 85/15,  $v = 1$  mL  $\cdot$  min $^{-1}$ ,  $\lambda = 254$  nm, t (major) = 11.4 min, t (minor) = 22.7 min];  $^1\text{H}$  NMR (400 MHz,  $\text{CDCl}_3$ )  $\delta$  0.73-0.87 (m, 2H), 1.01 (dt,  $J = 9.5, 6.4$  Hz, 1H), 1.51 (dt,  $J = 11.7, 6.3$  Hz, 1H), 2.77 (d,  $J = 13.0$  Hz, 1H), 2.99 (d,  $J = 13.0$  Hz, 1H), 3.28 (s, 3H), 3.96 (s, 3H), 5.23 (s, 1H), 7.05 (t,  $J = 7.2$  Hz, 2H), 7.30 (t,  $J = 7.7$  Hz, 1H), 7.34 – 7.38 (m, 1H), 7.54 (t,  $J = 7.8$  Hz, 1H), 7.69 (d,  $J = 7.9$  Hz, 1H), 8.05 (d,  $J = 7.8$  Hz, 1H), 8.21 (s, 1H) ppm;  $^{13}\text{C}$  NMR (100 MHz,  $\text{CDCl}_3$ )  $\delta$  11.3, 15.2, 29.9, 47.4, 52.1, 52.4, 62.5, 62.6, 110.7, 122.8, 124.3, 125.9, 126.7, 127.9, 129.0, 129.1, 130.0, 130.9, 131.2, 142.0, 159.2, 166.7, 172.2 ppm; HRMS (ESI)  $m/z$  calcd. for  $\text{C}_{23}\text{H}_{22}\text{NO}_7$   $[\text{M}+\text{H}]^+$ : 424.1391, found: 424.1387.

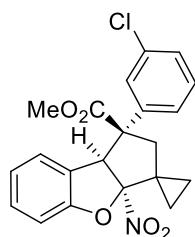

**Methyl(1S,3aS)-1-(3-chlorophenyl)-3a-nitro-1,2,3a,8b-tetrahydro spiro[cyclopenta[b]benzofuran-3,1'-cyclopropane]-1-carboxylate (5g)**

Colorless oil, 60 mg, 75% yield; dr = 5 : 1, 90% ee;  $[\alpha]_{\text{D}}^{20.0} = -96$  (0.1,  $\text{CH}_2\text{Cl}_2$ ); [Daicel CHIRALPAK® IC-U(0.46 cm  $\times$  25 cm), n-hexane/2-propanol = 97/3,  $v = 1$  mL  $\cdot$  min $^{-1}$ ,  $\lambda = 254$  nm, t (major) = 10.8 min, t (minor) = 7.5 min];  $^1\text{H}$  NMR (400 MHz,  $\text{CDCl}_3$ )



$\delta$  0.69-0.85 (m, 2H), 0.96-1.01 (m, 1H), 1.49 (dt,  $J = 10.3, 6.3$  Hz, 1H), 2.70 (d,  $J = 13.0$  Hz, 1H), 2.95 (d,  $J = 13.0$  Hz, 1H), 3.30 (s, 3H), 5.15 (s, 1H), 7.01 - 7.08 (m, 2H), 7.29 (d,  $J = 7.4$  Hz, 2H), 7.34 - 7.41 (m, 3H), 7.47 (s, 1H) ppm;  $^{13}\text{C}$  NMR (100 MHz,  $\text{CDCl}_3$ )  $\delta$  11.2, 15.0, 29.8, 47.4, 52.1, 62.4, 62.5, 110.7, 122.8, 124.3, 124.9, 125.9, 126.7, 127.1, 128.0, 130.1, 130.2, 135.0, 143.5, 159.3, 172.0 ppm; HRMS (ESI)  $m/z$  calcd. for  $\text{C}_{21}\text{H}_{19}\text{ClNO}_5$   $[\text{M}+\text{H}]^+$ : 400.0946, found: 400.0950.

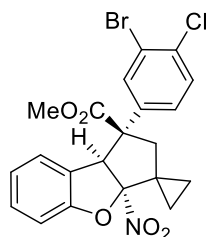

**Methyl(1S,3aS)-1-(3-bromo-4-chlorophenyl)-3a-nitro-1,2,3a,8b-tetrahydrospiro[cyclopenta[b]benzofuran-3,1'-cyclopropane]-1-carboxylate (5h)**

Colorless oil, 53 mg, 55% yield; dr = 4 : 1, 80% ee;  $[\alpha]_{\text{D}}^{20.0} = -114.3$  (0.1,  $\text{CH}_2\text{Cl}_2$ ); [Daicel CHIRALPAK® IC-U(0.46 cm  $\times$  25 cm),  $n$ -hexane/2-propanol = 97/3,  $v = 1$  mL  $\cdot$  min $^{-1}$ ,  $\lambda = 254$  nm,  $t$  (major) = 11.7 min,  $t$  (minor) = 8.7 min];  $^1\text{H}$  NMR (400 MHz,  $\text{CDCl}_3$ )  $\delta$  0.64-0.75 (m, 2H), 0.87-0.92 (m, 1H), 1.40 (dt,  $J = 10.3, 6.3$  Hz, 1H), 2.63 (d,  $J = 13.0$  Hz, 1H), 2.81 (d,  $J = 13.0$  Hz, 1H), 3.24 (s, 3H), 5.05 (s, 1H), 6.97 (t,  $J = 7.5$  Hz, 2H), 7.22 (dd,  $J = 12.2, 4.4$  Hz, 2H), 7.31 - 7.35 (m, 1H), 7.45 (d,  $J = 8.4$  Hz, 1H), 7.68 (d,  $J = 2.3$  Hz, 1H) ppm;  $^{13}\text{C}$  NMR (100 MHz,  $\text{CDCl}_3$ )  $\delta$  11.4, 14.8, 29.8, 47.2, 52.3, 61.9, 62.4, 110.8, 122.8, 123.1, 124.0, 125.7, 126.5, 126.9, 130.2, 130.7, 132.2, 134.1, 141.8, 159.2, 171.7 ppm; HRMS (ESI)  $m/z$  calcd. for  $\text{C}_{21}\text{H}_{18}\text{BrClNO}_5$   $[\text{M}+\text{H}]^+$ : 478.0051, found: 478.0054.

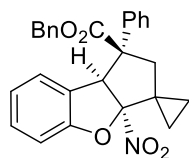

**Benzyl(1S,3aS)-3a-nitro-1-phenyl-1,2,3a,8b-tetrahydrospiro[cyclopenta[b]benzofuran-3,1'-cyclopropane]-1-carboxylate (5i)**

Colorless oil, 56 mg, 63% yield; dr > 20: 1, 71% ee;  $[\alpha]_{\text{D}}^{20.0} = -112.2$  (0.1,  $\text{CH}_2\text{Cl}_2$ ); [Daicel CHIRALPAK® IC-U(0.3 cm  $\times$  10 cm),  $n$ -hexane/2-propanol = 98.8/1.2,  $v = 0.3$  mL  $\cdot$  min $^{-1}$ ,  $\lambda = 254$  nm,  $t$  (major) = 9.2 min,  $t$  (minor) = 10.1 min];  $^1\text{H}$  NMR (400

MHz, CDCl<sub>3</sub>)  $\delta$  0.59-0.79 (m, 3H), 1.28 (dt,  $J = 8.9, 4.8$  Hz, 1H), 2.62 (d,  $J = 13.0$  Hz, 1H), 2.98 (d,  $J = 13.0$  Hz, 1H), 4.56 (d,  $J = 12.2$  Hz, 1H), 4.72 (d,  $J = 12.2$  Hz, 1H), 5.10 (s, 1H), 6.87 (d,  $J = 7.1$  Hz, 3H), 6.91 (d,  $J = 8.2$  Hz, 1H), 7.17 (dd,  $J = 9.1, 5.6$  Hz, 5H), 7.29 (t,  $J = 7.2$  Hz, 1H), 7.36 (t,  $J = 7.5$  Hz, 2H), 7.41 (d,  $J = 7.8$  Hz, 2H) ppm; <sup>13</sup>C NMR (100 MHz, CDCl<sub>3</sub>)  $\delta$  10.9, 15.3, 29.8, 47.5, 62.6, 62.8, 66.9, 110.6, 122.7, 124.7, 126.0, 126.7, 127.0, 127.8, 128.2, 128.3, 128.4, 128.9, 129.8, 135.1, 141.4, 159.4, 171.9 ppm; HRMS (ESI)  $m/z$  calcd. for C<sub>27</sub>H<sub>24</sub>NO<sub>5</sub> [M+H]<sup>+</sup>: 442.1649, found: 442.1653.

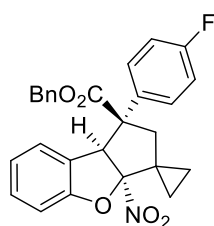

**Benzyl(1S,3aS)-1-(4-fluorophenyl)-3a-nitro-1,2,3a,8b-tetrahydrospiro[cyclopenta[b]benzofuran-3,1'-cyclopropane]-1-carboxylate (5j)**

Colorless oil, 62 mg, 67% yield; dr = 3 : 1, 91% ee;  $[\alpha]_D^{20.0} = -109.3$  (0.1, CH<sub>2</sub>Cl<sub>2</sub>); [Daicel CHIRALPAK® IC-U(0.46 cm × 25 cm), n-hexane/2-propanol = 97/3,  $v = 1$  mL·min<sup>-1</sup>,  $\lambda = 254$  nm, t (major) = 10.1 min, t (minor) = 8.5 min]; <sup>1</sup>H NMR (400 MHz, CDCl<sub>3</sub>)  $\delta$  0.67-0.82 (m, 3H), 1.32-1.37 (m, 1H), 2.69 (d,  $J = 13.0$  Hz, 1H), 2.99 (d,  $J = 13.0$  Hz, 1H), 4.66 (d,  $J = 12.2$  Hz, 1H), 4.79 (d,  $J = 12.2$  Hz, 1H), 5.13 (s, 1H), 6.93-7.01 (m, 4H), 7.12 (t,  $J = 8.6$  Hz, 2H), 7.24 (s, 1H), 7.27 - 7.36 (m, 4H), 7.46 (dd,  $J = 8.5, 5.2$  Hz, 2H) ppm; <sup>13</sup>C NMR (100 MHz, CDCl<sub>3</sub>)  $\delta$  11.0, 15.0, 29.8, 47.5, 62.0, 62.9, 67.1, 110.7, 115.8 (d,  $J = 21.4$  Hz), 122.8, 124.5, 125.8, 126.8, 128.4, 128.5, 128.5, 128.8 (d,  $J = 15.6$  Hz), 129.9, 134.9, 137.3 (d,  $J = 3.3$  Hz), 159.3, 162.2 (d,  $J = 245.8$  Hz), 171.7 ppm; HRMS (ESI)  $m/z$  calcd. for C<sub>27</sub>H<sub>23</sub>FNO<sub>5</sub> [M+H]<sup>+</sup>: 460.1555, found: 460.1554.

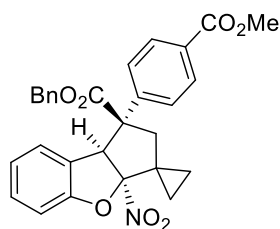

## Benzyl(1*S*,3*aS*)-1-(4-(methoxycarbonyl)phenyl)-3*a*-nitro-1,2,3*a*,8*b*-tetrahydro spiro [cyclopenta[*b*]benzofuran-3,1'-cyclopropane]-1-carboxylate (**5k**)

Colorless oil, 61 mg, 61% yield; dr = 5: 1, 89% ee;  $[\alpha]_D^{20.0} = -151.2$  (0.1, CH<sub>2</sub>Cl<sub>2</sub>); [Daicel CHIRALPAK® IA-U(0.46 cm × 25 cm), n-hexane/2-propanol = 90/10, v = 1 mL·min<sup>-1</sup>, λ = 254 nm, t (major) = 17.5 min, t (minor) = 21.4 min]; <sup>1</sup>H NMR (400 MHz, CDCl<sub>3</sub>) δ 0.61-0.86 (m, 3H), 1.36 (dt, *J* = 8.9, 4.8 Hz, 1H), 2.72 (d, *J* = 13.0 Hz, 1H), 2.98 (d, *J* = 13.0 Hz, 1H), 3.95 (s, 3H), 4.65 (d, *J* = 12.2 Hz, 1H), 4.78(d, *J* = 12.2 Hz, 1H), 5.19 (s, 1H), 6.94 (d, *J* = 7.3 Hz, 3H), 6.99 (d, *J* = 8.2 Hz, 1H), 7.22-7.27 (m, 5H), 7.56 (d, *J* = 8.1 Hz, 2H), 8.10 (d, *J* = 8.1 Hz, 2H) ppm; <sup>13</sup>C NMR (100 MHz, CDCl<sub>3</sub>) δ 11.1, 15.0, 29.8, 47.3, 52.3, 62.4, 62.6, 67.2, 110.7, 122.8, 124.2, 125.8, 126.7, 126.8, 128.4, 128.4, 128.5, 129.6, 130.0, 130.1, 134.7, 146.4, 159.3, 166.6, 171.3 ppm; HRMS (ESI) *m/z* calcd. for C<sub>29</sub>H<sub>26</sub>NO<sub>7</sub> [M+H]<sup>+</sup>: 500.1704, found: 500.1700.

## 5. Large Scale Synthesis and Further Product Diversification

### Synthesis of **6**

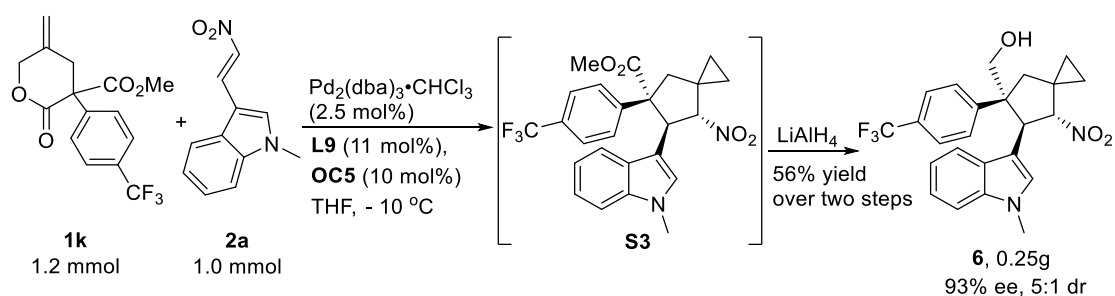

To a dried tube was added **1k** (1.2 mmol, 1.2 equiv.), indolyl nitroolefins **2a** (1 mmol, 1.0 equiv.), Pd<sub>2</sub>(dba)<sub>3</sub>·CHCl<sub>3</sub> (0.025 mmol, 26.4 mg, 2.5 mol%), **L9** (0.11 mmol, 67 mg, 11 mol%), **OC5** (0.1 mmol, 44 mg, 10 mol%) followed by the addition of 4Å molecule sieve and 5 mL of THF under nitrogen atmosphere. The reaction mixture was stirred at -10 °C for 12 h before LiAlH<sub>4</sub> (2 mmol, 76 mg) was added. The reaction mixture was stirred overnight and directly purified by silica gel chromatography (hexane/ethyl acetate = 5:1-3:1) to yield the product **6** as colorless oil.

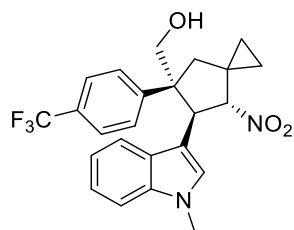

**((5R,6S,7R)-6-(1-methyl-1H-indol-3-yl)-7-nitro-5-(4-(trifluoromethyl)phenyl)spiro[2.4]heptan-5-yl)methanol (6)**

Colorless oil, 0.25g, 56% yield over two steps, dr = 5: 1, 93% ee,  $[\alpha]_D^{20.0} = -83.4$  (0.1, CH<sub>2</sub>Cl<sub>2</sub>). [Daicel CHIRALPAK® IA-U (0.3 cm × 10 cm), n-hexane/2-propanol = 80/20,  $v = 0.3 \text{ mL} \cdot \text{min}^{-1}$ ,  $\lambda = 254 \text{ nm}$ , t (major) = 4.6 min, t (minor) = 5.3 min]. <sup>1</sup>H NMR (400 MHz, CDCl<sub>3</sub>)  $\delta$  0.76-0.81 (m, 1H), 0.89-0.95 (m, 1H), 1.09-1.15 (m, 1H), 1.18-1.23 (m, 1H), 2.43 (d,  $J = 13.8 \text{ Hz}$ , 1H), 2.88 (d,  $J = 13.8 \text{ Hz}$ , 1H), 3.60 (s, 3H), 4.05 (q,  $J = 10.9 \text{ Hz}$ , 2H), 4.72 (d,  $J = 10.8 \text{ Hz}$ , 1H), 4.98 (d,  $J = 10.8 \text{ Hz}$ , 1H), 6.11 (s, 1H), 7.05 – 7.11 (m, 1H), 7.16 (d,  $J = 8.1 \text{ Hz}$ , 2H), 7.20-7.29 (m, 2H), 7.44 (dd,  $J = 12.6, 8.1 \text{ Hz}$ , 3H) ppm; <sup>13</sup>C NMR (100 MHz, CDCl<sub>3</sub>)  $\delta$  14.6, 17.2, 23.3, 32.8, 43.6, 48.9, 55.8, 68.9, 96.3, 108.8, 109.5, 118.8, 119.6, 122.1, 124.1 (q,  $J = 270.4 \text{ Hz}$ ), 124.7 (q,  $J = 3.7 \text{ Hz}$ ), 127.6, 127.9, 128.8, 129.3 (q,  $J = 32.1 \text{ Hz}$ ), 136.8, 144.6 ppm; HRMS (ESI) m/z calcd. for C<sub>24</sub>H<sub>24</sub>F<sub>3</sub>N<sub>2</sub>O<sub>3</sub> [M+H]<sup>+</sup>: 445.1734, found: 445.1736.

## Synthesis of 7

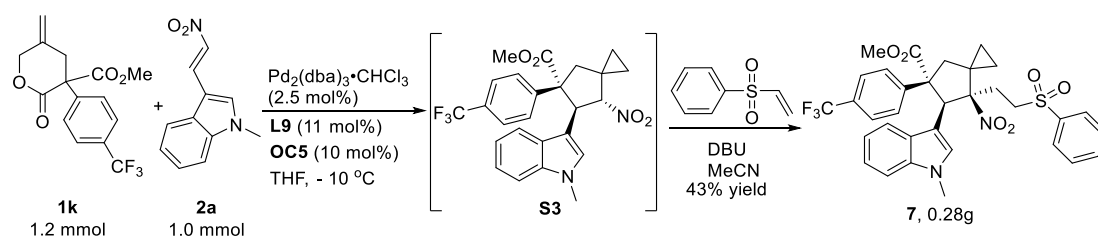

To a dried tube was added **1k** (1.2 mmol, 1.2 equiv.), indolyl nitroolefins **2a** (1 mmol, 1.0 equiv.), Pd<sub>2</sub>(dba)<sub>3</sub>·CHCl<sub>3</sub> (0.025 mmol, 26.4 mg, 2.5 mol%), **L9** (0.11 mmol, 67 mg, 11 mol%), **OC5** (0.1 mmol, 44 mg, 10 mol%) followed with the addition of 4Å molecule sieve and 5 mL of THF under nitrogen atmosphere. The reaction mixture was stirred at -10 °C for 12 h and directly purified by silica gel chromatography (hexane/ethyl acetate = 20:1-10:1) to yield the product **S3**. To a dried tube was added

**S3**, phenyl vinyl sulfone (1.5 mmol, 252 mg, 1.5 equiv.) and 10 mL of CH<sub>3</sub>CN under nitrogen atmosphere, the reaction mixture was stirred at 0 °C for 5 min before DBU (304 mg, 2 mmol, 2.0 equiv) was added. The reaction mixture was stirred overnight and purified directly by silica gel chromatography (hexane/ethyl acetate = 5:1-3:1) to yield the product **7** as colorless oil. (0.28 g, 44% yield).

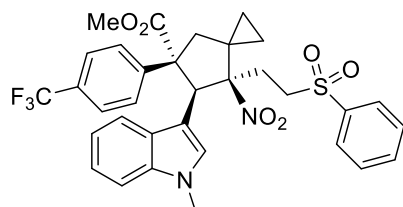

**Methyl(5R,6S,7S)-6-(1-methyl-1H-indol-3-yl)-7-nitro-7-(2-(phenylsulfonyl)ethyl)-5-(4-(trifluoromethyl)phenyl)spiro[2.4]heptane-5-carboxylate (7)**

Colorless oil, 0.28 g, 44% yield over two steps. <sup>1</sup>H NMR (400 MHz, CDCl<sub>3</sub>) δ 0.75-0.81 (m, 2H), 0.86-0.93 (m, 1H), 0.95-0.99 (m, 1H), 2.30 (d, *J* = 13.2 Hz, 1H), 2.32-2.45 (m, 2H), 2.85 (td, *J* = 12.7, 5.1 Hz, 1H), 3.06 (ddd, *J* = 14.8, 11.5, 3.6 Hz, 1H), 3.37 (s, 3H), 3.69 (s, 3H), 3.89 (d, *J* = 13.2 Hz, 1H), 5.60 (s, 1H), 5.81 (s, 1H), 6.98 (d, *J* = 8.1 Hz, 2H), 7.15 - 7.21 (m, 1H), 7.25 (d, *J* = 8.8 Hz, 2H), 7.27 - 7.32 (m, 2H), 7.45 (t, *J* = 7.6 Hz, 2H), 7.56 - 7.65 (m, 3H), 7.84 (d, *J* = 6.9 Hz, 1H) ppm; <sup>13</sup>C NMR (100 MHz, CDCl<sub>3</sub>) δ 7.9, 15.5, 28.4, 30.5, 32.5, 43.6, 51.4, 53.2, 53.4, 62.0, 102.7, 107.6, 109.4, 117.9, 120.3, 122.0, 124.0 (q, *J* = 270.3 Hz), 124.2 (q, *J* = 3.9 Hz), 127.9, 128.1, 128.9, 129.0 (q, *J* = 32.3 Hz), 129.2, 129.8, 133.7, 135.4, 138.7, 143.4, 176.5 ppm; HRMS (ESI) *m/z* calcd. for C<sub>33</sub>H<sub>32</sub>F<sub>3</sub>N<sub>2</sub>O<sub>6</sub>S [M+H]<sup>+</sup>: 641.1928, found: 641.1925.

## 6.X-ray Crystallography data of 3m and 5a

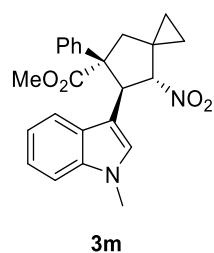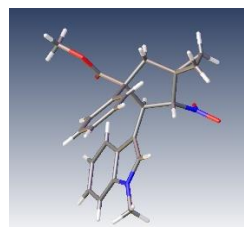

CCDC 2124879

210325G

**Table S4** Crystal data and structure refinement for 210325G.

|                                    |                                                               |
|------------------------------------|---------------------------------------------------------------|
| Identification code                | 210325G                                                       |
| Empirical formula                  | C <sub>48</sub> H <sub>48</sub> N <sub>4</sub> O <sub>8</sub> |
| Formula weight                     | 808.90                                                        |
| Temperature/K                      | 293(2)                                                        |
| Crystal system                     | triclinic                                                     |
| Space group                        | P-1                                                           |
| a/Å                                | 9.8261(3)                                                     |
| b/Å                                | 13.6993(3)                                                    |
| c/Å                                | 16.7931(4)                                                    |
| α/°                                | 91.1649(17)                                                   |
| β/°                                | 105.869(2)                                                    |
| γ/°                                | 95.1952(18)                                                   |
| Volume/Å <sup>3</sup>              | 2163.04(9)                                                    |
| Z                                  | 2                                                             |
| ρ <sub>calc</sub> /cm <sup>3</sup> | 1.242                                                         |
| μ/mm <sup>-1</sup>                 | 0.691                                                         |
| F(000)                             | 856.0                                                         |
| Crystal size/mm <sup>3</sup>       | 0.02 × 0.02 × 0.01                                            |
| Radiation                          | Cu Kα (λ = 1.54184)                                           |
| 2θ range for data collection/°     | 5.478 to 134.12                                               |
| Index ranges                       | -10 ≤ h ≤ 11, -16 ≤ k ≤ 16, -20 ≤ l ≤ 20                      |
| Reflections collected              | 73249                                                         |
| Independent reflections            | 7715 [R <sub>int</sub> = 0.0677, R <sub>sigma</sub> = 0.0370] |
| Data/restraints/parameters         | 7715/0/546                                                    |
| Goodness-of-fit on F <sup>2</sup>  | 1.054                                                         |
| Final R indexes [I >= 2σ (I)]      | R <sub>1</sub> = 0.0620, wR <sub>2</sub> = 0.1753             |
| Final R indexes [all data]         | R <sub>1</sub> = 0.0733, wR <sub>2</sub> = 0.1843             |

Largest diff. peak/hole / e Å<sup>-3</sup> 0.45/-0.26

**Table S5** Fractional Atomic Coordinates ( $\times 10^4$ ) and Equivalent Isotropic Displacement Parameters ( $\text{Å}^2 \times 10^3$ ) for 210325G.  $U_{\text{eq}}$  is defined as 1/3 of of the trace of the orthogonalised  $U_{ij}$  tensor.

| Atom | $x$      | $y$        | $z$         | $U(\text{eq})$ |
|------|----------|------------|-------------|----------------|
| O2   | 5830(3)  | 4368.5(19) | 9261.7(17)  | 109.0(8)       |
| O3   | 10665(3) | 8427(2)    | 11037.5(16) | 125.5(10)      |
| O6   | 7528(2)  | 4932.2(17) | 8783.7(13)  | 94.2(7)        |
| O7   | 10260(3) | 7947(3)    | 9718.8(17)  | 137.6(12)      |
| N1   | 6819(2)  | 4977.4(16) | 9271.0(14)  | 68.1(5)        |
| N3   | 4495(3)  | 7881.9(19) | 8635.5(16)  | 88.7(7)        |
| C2   | 7818(3)  | 4859(2)    | 11316.3(19) | 83.2(8)        |
| C5   | 7347(6)  | 8620(3)    | 7314(2)     | 115.1(15)      |
| C11  | 3007(4)  | 8031(3)    | 8523(3)     | 119.3(14)      |
| C13  | 5325(4)  | 8208(2)    | 8136.0(17)  | 83.7(9)        |
| C15  | 9374(3)  | 6385(2)    | 10968.1(18) | 77.4(7)        |
| C19  | 7319(4)  | 7462(2)    | 11560(2)    | 87.6(9)        |
| C21  | 6505(5)  | 8003(3)    | 11906(3)    | 117.3(14)      |
| C23  | 11869(6) | 9079(5)    | 10990(4)    | 175(3)         |
| C25  | 5250(3)  | 7325(2)    | 9213.2(18)  | 78.0(7)        |
| C26  | 7180(3)  | 5771.1(18) | 9940.4(15)  | 62.1(6)        |
| C28  | 8272(3)  | 5492(2)    | 10709.3(15) | 64.1(6)        |
| C32  | 7750(3)  | 6726.8(19) | 9658.1(15)  | 66.1(6)        |
| C33  | 7681(5)  | 8065(2)    | 8013.3(19)  | 97.6(11)       |
| C34  | 6598(3)  | 7269.5(19) | 9123.6(15)  | 70.2(7)        |
| C35  | 8731(4)  | 4479(2)    | 10836(2)    | 85.7(8)        |
| C36  | 7814(3)  | 7814(2)    | 10921.0(16) | 69.5(7)        |
| C37  | 9915(4)  | 7923(3)    | 10345(2)    | 91.0(9)        |
| C39  | 7417(4)  | 8723(2)    | 10631(2)    | 97.3(10)       |
| C41  | 4979(6)  | 8770(3)    | 7444(2)     | 113.6(14)      |
| C42  | 8699(3)  | 7250(2)    | 10495.0(16) | 69.2(7)        |
| C43  | 6573(5)  | 9240(3)    | 10979(3)    | 121.2(14)      |
| C44  | 6661(4)  | 7843.9(19) | 8429.2(17)  | 79.5(8)        |
| C45  | 6112(5)  | 8882(4)    | 11622(4)    | 127.7(16)      |
| C47  | 6038(8)  | 8970(3)    | 7049(3)     | 133.9(19)      |

**Table S6** Anisotropic Displacement Parameters ( $\text{Å}^2 \times 10^3$ ) for 210325G. The Anisotropic displacement factor exponent takes the form:  $-2\pi^2[h^2a^*U_{11}+2hka^*b^*U_{12}+\dots]$ .

| Atom | $U_{11}$ | $U_{22}$ | $U_{33}$ | $U_{23}$ | $U_{13}$ | $U_{12}$ |
|------|----------|----------|----------|----------|----------|----------|
|------|----------|----------|----------|----------|----------|----------|

|     |           |           |           |           |          |           |
|-----|-----------|-----------|-----------|-----------|----------|-----------|
| O2  | 96.8(16)  | 103.3(16) | 122.8(19) | -23.4(14) | 39.3(14) | -33.0(14) |
| O3  | 109.1(18) | 156(2)    | 103.0(17) | -40.8(16) | 44.3(15) | -68.0(17) |
| O6  | 96.5(15)  | 104.9(16) | 84.4(14)  | -24.5(11) | 38.4(12) | -8.8(12)  |
| O7  | 126(2)    | 188(3)    | 94.2(17)  | -14.4(18) | 50.7(16) | -68(2)    |
| N1  | 61.3(13)  | 72.0(13)  | 68.2(13)  | -0.6(10)  | 16.0(10) | 0.0(10)   |
| N3  | 97.3(19)  | 79.5(16)  | 75.7(16)  | -3.8(13)  | 0.3(14)  | 12.1(14)  |
| C2  | 79.4(19)  | 98(2)     | 74.3(18)  | 18.2(15)  | 23.0(15) | 12.0(16)  |
| C5  | 195(5)    | 76(2)     | 74(2)     | -2.1(17)  | 48(3)    | -20(3)    |
| C11 | 95(3)     | 110(3)    | 131(3)    | -11(2)    | -10(2)   | 31(2)     |
| C13 | 124(3)    | 56.4(14)  | 56.0(15)  | -8.7(12)  | 1.1(16)  | 5.9(16)   |
| C15 | 60.1(15)  | 94(2)     | 73.5(17)  | -2.8(14)  | 12.3(13) | 3.9(14)   |
| C19 | 92(2)     | 83.4(19)  | 95(2)     | -5.9(16)  | 43.4(18) | -4.9(16)  |
| C21 | 130(3)    | 106(3)    | 137(3)    | -19(2)    | 80(3)    | -4(2)     |
| C23 | 141(4)    | 211(6)    | 160(4)    | -58(4)    | 65(3)    | -112(4)   |
| C25 | 77.7(19)  | 78.9(18)  | 67.8(16)  | 1.2(13)   | 5.4(14)  | 4.5(14)   |
| C26 | 60.6(14)  | 67.5(14)  | 57.8(13)  | -0.8(11)  | 16.8(11) | 4.7(11)   |
| C28 | 57.6(14)  | 75.2(15)  | 59.1(14)  | 3.6(11)   | 14.4(11) | 10.2(12)  |
| C32 | 67.6(15)  | 71.3(15)  | 58.2(14)  | -0.4(11)  | 19.0(12) | -3.7(12)  |
| C33 | 156(3)    | 69.5(17)  | 68.1(18)  | -10.8(14) | 43(2)    | -21.1(19) |
| C34 | 87.2(19)  | 64.0(15)  | 54.0(14)  | -3.2(11)  | 14.6(13) | -4.3(13)  |
| C35 | 86(2)     | 88(2)     | 86(2)     | 11.9(16)  | 21.5(16) | 26.7(16)  |
| C36 | 66.0(15)  | 74.1(16)  | 63.2(15)  | -7.4(12)  | 15.1(12) | -8.5(12)  |
| C37 | 84(2)     | 108(2)    | 80(2)     | -9.9(17)  | 33.1(16) | -25.8(17) |
| C39 | 125(3)    | 73.4(19)  | 88(2)     | -6.1(16)  | 22(2)    | 3.7(19)   |
| C41 | 177(4)    | 74(2)     | 71(2)     | -3.8(16)  | 1(2)     | 21(2)     |
| C42 | 65.0(15)  | 77.3(16)  | 63.1(15)  | -3.0(12)  | 19.0(12) | -6.7(12)  |
| C43 | 139(4)    | 78(2)     | 137(4)    | -19(2)    | 19(3)    | 21(2)     |
| C44 | 116(2)    | 55.9(14)  | 59.7(15)  | -12.9(12) | 20.3(16) | -9.8(15)  |
| C45 | 109(3)    | 109(3)    | 171(5)    | -42(3)    | 53(3)    | 9(2)      |
| C47 | 237(6)    | 76(2)     | 76(2)     | 9.9(18)   | 26(3)    | 6(3)      |

**Table S7** Bond Lengths for 210325G.

| Atom | Atom | Length/Å | Atom | Atom | Length/Å |
|------|------|----------|------|------|----------|
| O2   | N1   | 1.219(3) | C19  | C21  | 1.368(5) |
| O3   | C23  | 1.438(5) | C19  | C36  | 1.372(4) |
| O3   | C37  | 1.333(4) | C21  | C45  | 1.355(7) |
| O6   | N1   | 1.215(3) | C25  | C34  | 1.382(4) |
| O7   | C37  | 1.191(4) | C26  | C28  | 1.517(3) |
| N1   | C26  | 1.495(3) | C26  | C32  | 1.513(4) |
| N3   | C11  | 1.455(5) | C28  | C35  | 1.499(4) |



|     |     |          |     |     |          |
|-----|-----|----------|-----|-----|----------|
| N3  | C13 | 1.375(4) | C32 | C34 | 1.505(4) |
| N3  | C25 | 1.346(4) | C32 | C42 | 1.574(4) |
| C2  | C28 | 1.485(4) | C33 | C44 | 1.385(5) |
| C2  | C35 | 1.480(4) | C34 | C44 | 1.432(4) |
| C5  | C33 | 1.391(5) | C36 | C39 | 1.396(4) |
| C5  | C47 | 1.375(7) | C36 | C42 | 1.519(4) |
| C13 | C41 | 1.388(5) | C37 | C42 | 1.522(4) |
| C13 | C44 | 1.411(5) | C39 | C43 | 1.373(6) |
| C15 | C28 | 1.529(4) | C41 | C47 | 1.389(7) |
| C15 | C42 | 1.539(4) | C43 | C45 | 1.365(7) |

**Table S8** Bond Angles for 210325G.

| Atom | Atom | Atom | Angle/°   | Atom | Atom | Atom | Angle/°   |
|------|------|------|-----------|------|------|------|-----------|
| C37  | O3   | C23  | 117.4(3)  | C34  | C32  | C42  | 118.2(2)  |
| O2   | N1   | C26  | 117.0(2)  | C44  | C33  | C5   | 119.1(4)  |
| O6   | N1   | O2   | 122.4(2)  | C25  | C34  | C32  | 126.6(2)  |
| O6   | N1   | C26  | 120.5(2)  | C25  | C34  | C44  | 105.5(3)  |
| C13  | N3   | C11  | 126.3(3)  | C44  | C34  | C32  | 127.9(3)  |
| C25  | N3   | C11  | 124.8(3)  | C2   | C35  | C28  | 59.81(19) |
| C25  | N3   | C13  | 108.6(3)  | C19  | C36  | C39  | 117.3(3)  |
| C35  | C2   | C28  | 60.75(19) | C19  | C36  | C42  | 123.6(3)  |
| C47  | C5   | C33  | 120.7(4)  | C39  | C36  | C42  | 119.0(3)  |
| N3   | C13  | C41  | 129.1(4)  | O3   | C37  | C42  | 111.5(3)  |
| N3   | C13  | C44  | 107.9(3)  | O7   | C37  | O3   | 122.6(3)  |
| C41  | C13  | C44  | 123.0(4)  | O7   | C37  | C42  | 125.6(3)  |
| C28  | C15  | C42  | 106.5(2)  | C43  | C39  | C36  | 120.9(4)  |
| C21  | C19  | C36  | 120.6(4)  | C13  | C41  | C47  | 116.1(4)  |
| C45  | C21  | C19  | 122.2(4)  | C15  | C42  | C32  | 102.1(2)  |
| N3   | C25  | C34  | 111.1(3)  | C36  | C42  | C15  | 115.3(2)  |
| N1   | C26  | C28  | 112.0(2)  | C36  | C42  | C32  | 111.0(2)  |
| N1   | C26  | C32  | 112.0(2)  | C36  | C42  | C37  | 110.8(2)  |
| C32  | C26  | C28  | 108.2(2)  | C37  | C42  | C15  | 106.4(2)  |
| C2   | C28  | C15  | 122.9(2)  | C37  | C42  | C32  | 110.7(2)  |
| C2   | C28  | C26  | 120.0(2)  | C45  | C43  | C39  | 120.8(4)  |
| C2   | C28  | C35  | 59.4(2)   | C13  | C44  | C34  | 106.8(3)  |
| C26  | C28  | C15  | 105.9(2)  | C33  | C44  | C13  | 118.6(3)  |
| C35  | C28  | C15  | 119.8(2)  | C33  | C44  | C34  | 134.5(3)  |
| C35  | C28  | C26  | 123.5(2)  | C21  | C45  | C43  | 118.3(4)  |
| C26  | C32  | C42  | 102.7(2)  | C5   | C47  | C41  | 122.4(4)  |
| C34  | C32  | C26  | 112.8(2)  |      |      |      |           |

**Table S9** Torsion Angles for 210325G.

| A   | B   | C   | D   | Angle/°   | A   | B   | C   | D   | Angle/°   |
|-----|-----|-----|-----|-----------|-----|-----|-----|-----|-----------|
| O2  | N1  | C26 | C28 | 90.5(3)   | C25 | C34 | C44 | C33 | -178.3(3) |
| O2  | N1  | C26 | C32 | -147.8(3) | C26 | C28 | C35 | C2  | -107.8(3) |
| O3  | C37 | C42 | C15 | -74.4(4)  | C26 | C32 | C34 | C25 | 36.7(4)   |
| O3  | C37 | C42 | C32 | 175.3(3)  | C26 | C32 | C34 | C44 | -144.3(3) |
| O3  | C37 | C42 | C36 | 51.7(4)   | C26 | C32 | C42 | C15 | 38.0(3)   |
| O6  | N1  | C26 | C28 | -86.7(3)  | C26 | C32 | C42 | C36 | -85.5(3)  |
| O6  | N1  | C26 | C32 | 35.0(3)   | C26 | C32 | C42 | C37 | 151.0(3)  |
| O7  | C37 | C42 | C15 | 99.0(5)   | C28 | C15 | C42 | C32 | -32.8(3)  |
| O7  | C37 | C42 | C32 | -11.3(5)  | C28 | C15 | C42 | C36 | 87.7(3)   |
| O7  | C37 | C42 | C36 | -134.9(4) | C28 | C15 | C42 | C37 | -149.0(2) |
| N1  | C26 | C28 | C2  | -81.5(3)  | C28 | C26 | C32 | C34 | -158.3(2) |
| N1  | C26 | C28 | C15 | 133.8(2)  | C28 | C26 | C32 | C42 | -30.0(3)  |
| N1  | C26 | C28 | C35 | -10.3(3)  | C32 | C26 | C28 | C2  | 154.6(2)  |
| N1  | C26 | C32 | C34 | 77.9(3)   | C32 | C26 | C28 | C15 | 9.9(3)    |
| N1  | C26 | C32 | C42 | -153.8(2) | C32 | C26 | C28 | C35 | -134.1(3) |
| N3  | C13 | C41 | C47 | -178.6(3) | C32 | C34 | C44 | C13 | -179.7(2) |
| N3  | C13 | C44 | C33 | 179.0(2)  | C32 | C34 | C44 | C33 | 2.5(5)    |
| N3  | C13 | C44 | C34 | 0.8(3)    | C33 | C5  | C47 | C41 | -1.8(6)   |
| N3  | C25 | C34 | C32 | 179.2(2)  | C34 | C32 | C42 | C15 | 162.8(2)  |
| N3  | C25 | C34 | C44 | 0.0(3)    | C34 | C32 | C42 | C36 | 39.4(3)   |
| C5  | C33 | C44 | C13 | -1.2(4)   | C34 | C32 | C42 | C37 | -84.2(3)  |
| C5  | C33 | C44 | C34 | 176.4(3)  | C35 | C2  | C28 | C15 | -107.8(3) |
| C11 | N3  | C13 | C41 | 2.5(5)    | C35 | C2  | C28 | C26 | 113.6(3)  |
| C11 | N3  | C13 | C44 | -175.7(3) | C36 | C19 | C21 | C45 | 2.3(7)    |
| C11 | N3  | C25 | C34 | 175.5(3)  | C36 | C39 | C43 | C45 | 0.6(6)    |
| C13 | N3  | C25 | C34 | 0.5(3)    | C39 | C36 | C42 | C15 | 166.5(3)  |
| C13 | C41 | C47 | C5  | 1.2(6)    | C39 | C36 | C42 | C32 | -78.0(3)  |
| C15 | C28 | C35 | C2  | 112.9(3)  | C39 | C36 | C42 | C37 | 45.5(4)   |
| C19 | C21 | C45 | C43 | -1.2(7)   | C39 | C43 | C45 | C21 | -0.2(7)   |
| C19 | C36 | C39 | C43 | 0.4(5)    | C41 | C13 | C44 | C33 | 0.7(4)    |
| C19 | C36 | C42 | C15 | -16.5(4)  | C41 | C13 | C44 | C34 | -177.5(3) |
| C19 | C36 | C42 | C32 | 99.0(3)   | C42 | C15 | C28 | C2  | -128.5(3) |
| C19 | C36 | C42 | C37 | -137.5(3) | C42 | C15 | C28 | C26 | 15.0(3)   |
| C21 | C19 | C36 | C39 | -1.7(5)   | C42 | C15 | C28 | C35 | 160.6(2)  |
| C21 | C19 | C36 | C42 | -178.8(3) | C42 | C32 | C34 | C25 | -83.0(3)  |
| C23 | O3  | C37 | O7  | 5.1(7)    | C42 | C32 | C34 | C44 | 96.1(3)   |
| C23 | O3  | C37 | C42 | 178.7(4)  | C42 | C36 | C39 | C43 | 177.6(3)  |

C25 N3 C13 C41 177.4(3)      C44 C13 C41 C47 -0.7(5)  
 C25 N3 C13 C44 -0.8(3)      C47 C5 C33 C44 1.8(5)  
 C25 C34 C44 C13 -0.4(3)

**Table S10** Hydrogen Atom Coordinates ( $\text{\AA} \times 10^4$ ) and Isotropic Displacement Parameters ( $\text{\AA}^2 \times 10^3$ ) for 210325G.

| Atom | <i>x</i> | <i>y</i> | <i>z</i> | U(eq) |
|------|----------|----------|----------|-------|
| H2A  | 8245     | 5027     | 11901    | 100   |
| H2B  | 6830     | 4587     | 11176    | 100   |
| H5   | 8016     | 8756     | 7023     | 138   |
| H11A | 2416     | 7534     | 8140     | 179   |
| H11B | 2834     | 8666     | 8309     | 179   |
| H11C | 2792     | 7991     | 9046     | 179   |
| H15A | 10239    | 6267     | 10826    | 93    |
| H15B | 9604     | 6523     | 11561    | 93    |
| H19  | 7540     | 6851     | 11759    | 105   |
| H21  | 6211     | 7758     | 12351    | 141   |
| H23A | 11583    | 9500     | 10537    | 263   |
| H23B | 12598    | 8702     | 10903    | 263   |
| H23C | 12230    | 9469     | 11498    | 263   |
| H25  | 4909     | 7018     | 9619     | 94    |
| H26  | 6310     | 5882     | 10093    | 74    |
| H32  | 8385     | 6568     | 9325     | 79    |
| H33  | 8577     | 7845     | 8199     | 117   |
| H35A | 8301     | 3978     | 10402    | 103   |
| H35B | 9717     | 4418     | 11127    | 103   |
| H39  | 7729     | 8982     | 10196    | 117   |
| H41  | 4089     | 8999     | 7255     | 136   |
| H43  | 6313     | 9842     | 10773    | 145   |
| H45  | 5543     | 9233     | 11859    | 153   |
| H47  | 5855     | 9355     | 6589     | 161   |

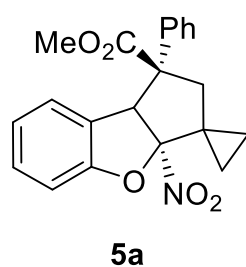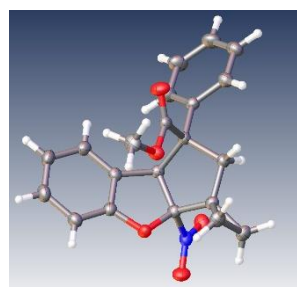

**Table S11 Crystal data and structure refinement for 2143508.**

|                                    |                                                               |
|------------------------------------|---------------------------------------------------------------|
| Identification code                | 2143508                                                       |
| Empirical formula                  | C <sub>21</sub> H <sub>19</sub> NO <sub>5</sub>               |
| Formula weight                     | 365.37                                                        |
| Temperature/K                      | 173(2)                                                        |
| Crystal system                     | triclinic                                                     |
| Space group                        | P-1                                                           |
| a/Å                                | 7.2248(3)                                                     |
| b/Å                                | 10.9399(4)                                                    |
| c/Å                                | 12.5947(5)                                                    |
| α/°                                | 115.361(4)                                                    |
| β/°                                | 100.031(3)                                                    |
| γ/°                                | 95.232(3)                                                     |
| Volume/Å <sup>3</sup>              | 870.27(6)                                                     |
| Z                                  | 2                                                             |
| ρ <sub>calc</sub> /cm <sup>3</sup> | 1.394                                                         |
| μ/mm <sup>-1</sup>                 | 0.826                                                         |
| F(000)                             | 384.0                                                         |
| Crystal size/mm <sup>3</sup>       | 0.07 × 0.06 × 0.05                                            |
| Radiation                          | Cu Kα (λ = 1.54184)                                           |
| 2θ range for data collection/°     | 7.996 to 134.118                                              |
| Index ranges                       | -8 ≤ h ≤ 8, -13 ≤ k ≤ 13, -14 ≤ l ≤ 15                        |
| Reflections collected              | 22711                                                         |
| Independent reflections            | 3098 [R <sub>int</sub> = 0.0645, R <sub>sigma</sub> = 0.0345] |
| Data/restraints/parameters         | 3098/186/245                                                  |
| Goodness-of-fit on F <sup>2</sup>  | 1.053                                                         |
| Final R indexes [I ≥ 2σ (I)]       | R <sub>1</sub> = 0.0380, wR <sub>2</sub> = 0.0938             |

Final R indexes [all data]  $R_1 = 0.0466$ ,  $wR_2 = 0.0984$

Largest diff. peak/hole /  $e \text{ \AA}^{-3}$  0.20/-0.22

**Table S12 Fractional Atomic Coordinates ( $\times 10^4$ ) and Equivalent Isotropic Displacement Parameters ( $\text{\AA}^2 \times 10^3$ ) for 220118F\_auto.  $U_{eq}$  is defined as 1/3 of of the trace of the orthogonalised  $U_{ij}$  tensor.**

| Atom | x           | y          | z          | U(eq)   |
|------|-------------|------------|------------|---------|
| O1   | 236.6(14)   | 2448.9(10) | 6124.0(9)  | 26.6(2) |
| O2   | -1083.9(15) | 4304.1(11) | 6413.7(11) | 36.6(3) |
| O3   | 7221.4(15)  | 4569.5(11) | 8667.1(10) | 34.2(3) |
| O4   | 4279.7(14)  | 1768.3(10) | 6180.5(9)  | 25.8(2) |
| O5   | 7536.3(15)  | 2446.2(12) | 7734.7(11) | 37.0(3) |
| N1   | 6616.3(17)  | 3370.1(13) | 7921.4(11) | 26.3(3) |
| C1   | 3473.7(19)  | 3415.1(14) | 5579.8(13) | 23.4(3) |
| C2   | 2284(2)     | 1504.8(15) | 7899.5(14) | 30.4(3) |
| C3   | 1189(2)     | 6744.3(15) | 8969.5(14) | 28.6(3) |
| C4   | 3864.1(19)  | 4131.4(14) | 6938.4(13) | 22.0(3) |
| C5   | 3129(3)     | 8388.9(17) | 8209.7(17) | 38.6(4) |
| C6   | 3735.2(19)  | 2068.3(15) | 5215.6(13) | 23.7(3) |
| C7   | 1207(2)     | 8150.0(16) | 9492.3(15) | 34.3(4) |
| C8   | 3346(2)     | 2876.8(14) | 8137.1(13) | 23.3(3) |
| C9   | 2739(2)     | 1542.8(17) | 3161.4(14) | 33.5(4) |
| C10  | 2467(2)     | 4155.1(14) | 8575.4(13) | 23.5(3) |
| C11  | 2823(2)     | 3831.8(16) | 4711.3(14) | 28.8(3) |
| C12  | 2161(2)     | 6140.2(14) | 8063.2(13) | 24.4(3) |
| C13  | 2449(2)     | 2879.7(17) | 3493.6(15) | 33.6(4) |
| C14  | 4475.5(19)  | 2983.9(14) | 7254.1(13) | 22.8(3) |

|     |            |            |            |         |
|-----|------------|------------|------------|---------|
| C15 | 3108(2)    | 6981.3(16) | 7681.4(15) | 32.5(4) |
| C16 | 3395(2)    | 1102.5(16) | 4021.0(14) | 29.3(3) |
| C17 | -1348(2)   | 1601.9(16) | 5114.1(15) | 34.5(4) |
| C18 | 241(2)     | 3801.7(14) | 6638.8(13) | 23.5(3) |
| C19 | 2188(2)    | 8976.1(16) | 9117.4(16) | 38.1(4) |
| C20 | 2153.7(19) | 4595.0(14) | 7547.2(13) | 22.0(3) |
| C21 | 3964(2)    | 2250.9(16) | 8969.4(14) | 29.6(3) |

**Table S13 Anisotropic Displacement Parameters ( $\text{\AA}^2 \times 10^3$ ) for 220118F\_auto. The**

**Anisotropic displacement factor exponent takes the form: -  $2\pi^2[h^2a^*^2U_{11}+2hka^*b^*U_{12}+\dots]$ .**

| Atom | $U_{11}$ | $U_{22}$ | $U_{33}$ | $U_{23}$ | $U_{13}$ | $U_{12}$ |
|------|----------|----------|----------|----------|----------|----------|
| O1   | 22.4(5)  | 22.4(5)  | 28.3(6)  | 6.9(4)   | 2.7(4)   | 2.2(4)   |
| O2   | 31.0(6)  | 32.8(6)  | 41.7(7)  | 15.6(5)  | -1.0(5)  | 10.8(5)  |
| O3   | 27.7(6)  | 36.7(6)  | 26.5(6)  | 6.7(5)   | 2.3(5)   | -1.6(5)  |
| O4   | 30.9(5)  | 23.2(5)  | 21.4(5)  | 8.4(4)   | 4.3(4)   | 8.4(4)   |
| O5   | 28.1(6)  | 45.1(7)  | 41.2(7)  | 20.8(6)  | 7.5(5)   | 16.7(5)  |
| N1   | 22.0(6)  | 34.2(7)  | 22.9(6)  | 13.1(6)  | 5.8(5)   | 5.3(5)   |
| C1   | 20.3(6)  | 25.4(7)  | 24.3(7)  | 10.4(6)  | 6.9(5)   | 4.0(5)   |
| C2   | 33.1(8)  | 25.2(7)  | 32.0(8)  | 14.4(6)  | 4.2(7)   | 0.8(6)   |
| C3   | 27.9(7)  | 27.0(7)  | 28.5(8)  | 10.4(6)  | 6.6(6)   | 5.4(6)   |
| C4   | 21.7(6)  | 21.6(7)  | 23.1(7)  | 10.2(6)  | 5.7(5)   | 4.1(5)   |
| C5   | 44.3(9)  | 27.3(8)  | 50.7(10) | 21.5(7)  | 15.9(8)  | 7.8(7)   |
| C6   | 20.6(6)  | 27.1(7)  | 23.5(7)  | 11.5(6)  | 4.9(5)   | 5.0(5)   |
| C7   | 35.6(8)  | 29.7(8)  | 33.0(9)  | 8.6(7)   | 9.3(7)   | 11.8(6)  |
| C8   | 22.8(6)  | 23.2(7)  | 23.1(7)  | 10.7(6)  | 3.2(5)   | 3.4(5)   |
| C9   | 33.9(8)  | 38.6(9)  | 22.7(8)  | 9.1(7)   | 6.4(6)   | 6.3(7)   |
| C10  | 24.4(7)  | 23.6(7)  | 22.1(7)  | 9.4(6)   | 6.3(6)   | 4.9(5)   |

|     |         |         |          |         |         |         |
|-----|---------|---------|----------|---------|---------|---------|
| C11 | 30.1(8) | 31.8(8) | 29.3(8)  | 16.5(6) | 9.9(6)  | 9.2(6)  |
| C12 | 24.3(7) | 23.1(7) | 24.1(7)  | 9.9(6)  | 3.4(6)  | 5.3(5)  |
| C13 | 35.5(8) | 43.2(9) | 26.5(8)  | 19.3(7) | 7.4(6)  | 10.1(7) |
| C14 | 21.4(6) | 22.0(7) | 21.9(7)  | 7.9(5)  | 2.9(5)  | 4.2(5)  |
| C15 | 37.8(8) | 27.6(8) | 36.9(9)  | 16.0(7) | 14.6(7) | 9.9(6)  |
| C16 | 28.9(7) | 28.6(7) | 26.4(8)  | 8.4(6)  | 7.0(6)  | 7.0(6)  |
| C17 | 27.5(8) | 31.8(8) | 29.7(9)  | 4.6(7)  | 0.3(7)  | -1.1(6) |
| C18 | 25.7(7) | 24.3(7) | 22.2(7)  | 11.2(6) | 7.9(6)  | 5.6(6)  |
| C19 | 43.2(9) | 22.7(8) | 44.0(10) | 11.2(7) | 8.3(8)  | 10.1(7) |
| C20 | 22.3(7) | 21.4(7) | 22.1(7)  | 9.2(5)  | 6.3(5)  | 4.8(5)  |
| C21 | 31.4(8) | 30.5(8) | 29.3(8)  | 16.9(6) | 4.5(6)  | 4.7(6)  |

**Table S14 Bond Lengths for 220118F\_auto.**

| Atom | Atom | Length/Å   | Atom | Atom | Length/Å   |
|------|------|------------|------|------|------------|
| O1   | C17  | 1.4412(18) | C4   | C20  | 1.5759(18) |
| O1   | C18  | 1.3368(17) | C5   | C15  | 1.389(2)   |
| O2   | C18  | 1.1972(18) | C5   | C19  | 1.379(2)   |
| O3   | N1   | 1.2213(16) | C6   | C16  | 1.379(2)   |
| O4   | C6   | 1.3921(18) | C7   | C19  | 1.381(2)   |
| O4   | C14  | 1.4056(17) | C8   | C10  | 1.5120(19) |
| O5   | N1   | 1.2215(16) | C8   | C14  | 1.526(2)   |
| N1   | C14  | 1.5495(18) | C8   | C21  | 1.508(2)   |
| C1   | C4   | 1.505(2)   | C9   | C13  | 1.386(2)   |
| C1   | C6   | 1.385(2)   | C9   | C16  | 1.392(2)   |
| C1   | C11  | 1.383(2)   | C10  | C20  | 1.553(2)   |
| C2   | C8   | 1.502(2)   | C11  | C13  | 1.395(2)   |
| C2   | C21  | 1.504(2)   | C12  | C15  | 1.387(2)   |
| C3   | C7   | 1.387(2)   | C12  | C20  | 1.5284(19) |

C3 C12 1.397(2) C18 C20 1.534(2)  
 C4 C14 1.548(2)

**Table S15 Bond Angles for 220118F\_auto.**

| Atom Atom Atom Angle/° |    |     |            | Atom Atom Atom Angle/° |     |     |            |
|------------------------|----|-----|------------|------------------------|-----|-----|------------|
| C18                    | O1 | C17 | 116.22(11) | C8                     | C10 | C20 | 107.32(11) |
| C6                     | O4 | C14 | 107.67(10) | C1                     | C11 | C13 | 118.85(14) |
| O3                     | N1 | O5  | 124.63(13) | C3                     | C12 | C20 | 118.88(13) |
| O3                     | N1 | C14 | 116.99(11) | C15                    | C12 | C3  | 118.07(13) |
| O5                     | N1 | C14 | 118.15(12) | C15                    | C12 | C20 | 123.04(13) |
| C6                     | C1 | C4  | 108.51(12) | C9                     | C13 | C11 | 120.50(15) |
| C11                    | C1 | C4  | 132.22(13) | O4                     | C14 | N1  | 106.42(10) |
| C11                    | C1 | C6  | 119.12(14) | O4                     | C14 | C4  | 109.33(11) |
| C8                     | C2 | C21 | 60.22(10)  | O4                     | C14 | C8  | 115.77(11) |
| C7                     | C3 | C12 | 120.95(15) | C4                     | C14 | N1  | 110.89(11) |
| C1                     | C4 | C14 | 101.32(11) | C8                     | C14 | N1  | 106.43(11) |
| C1                     | C4 | C20 | 118.67(12) | C8                     | C14 | C4  | 107.98(11) |
| C14                    | C4 | C20 | 106.36(11) | C12                    | C15 | C5  | 120.83(15) |
| C19                    | C5 | C15 | 120.51(16) | C6                     | C16 | C9  | 116.32(14) |
| C1                     | C6 | O4  | 112.98(12) | O1                     | C18 | C20 | 110.58(11) |
| C16                    | C6 | O4  | 123.30(13) | O2                     | C18 | O1  | 123.84(13) |
| C16                    | C6 | C1  | 123.64(14) | O2                     | C18 | C20 | 125.59(13) |
| C19                    | C7 | C3  | 120.18(15) | C5                     | C19 | C7  | 119.43(15) |
| C2                     | C8 | C10 | 121.64(12) | C10                    | C20 | C4  | 102.50(11) |
| C2                     | C8 | C14 | 120.28(12) | C12                    | C20 | C4  | 114.06(11) |
| C2                     | C8 | C21 | 59.96(10)  | C12                    | C20 | C10 | 110.62(11) |
| C10                    | C8 | C14 | 105.82(11) | C12                    | C20 | C18 | 109.37(11) |
| C21                    | C8 | C10 | 120.35(12) | C18                    | C20 | C4  | 110.05(11) |



|     |    |     |            |     |     |     |            |
|-----|----|-----|------------|-----|-----|-----|------------|
| C21 | C8 | C14 | 123.69(12) | C18 | C20 | C10 | 110.06(11) |
| C13 | C9 | C16 | 121.57(15) | C2  | C21 | C8  | 59.81(10)  |

**Table S16 Torsion Angles for 220118F\_auto.**

| A  | B   | C   | D   | Angle/°     | A   | B   | C   | D   | Angle/°     |
|----|-----|-----|-----|-------------|-----|-----|-----|-----|-------------|
| O1 | C18 | C20 | C4  | 50.57(15)   | C7  | C3  | C12 | C20 | 177.94(14)  |
| O1 | C18 | C20 | C10 | -61.68(14)  | C8  | C10 | C20 | C4  | -32.06(14)  |
| O1 | C18 | C20 | C12 | 176.60(11)  | C8  | C10 | C20 | C12 | -154.04(11) |
| O2 | C18 | C20 | C4  | -129.75(15) | C8  | C10 | C20 | C18 | 84.99(13)   |
| O2 | C18 | C20 | C10 | 118.00(16)  | C10 | C8  | C14 | O4  | -136.47(12) |
| O2 | C18 | C20 | C12 | -3.7(2)     | C10 | C8  | C14 | N1  | 105.52(12)  |
| O3 | N1  | C14 | O4  | 158.55(12)  | C10 | C8  | C14 | C4  | -13.58(15)  |
| O3 | N1  | C14 | C4  | 39.75(16)   | C10 | C8  | C21 | C2  | 111.32(15)  |
| O3 | N1  | C14 | C8  | -77.44(15)  | C11 | C1  | C4  | C14 | 177.92(15)  |
| O4 | C6  | C16 | C9  | 175.89(13)  | C11 | C1  | C4  | C20 | 62.0(2)     |
| O5 | N1  | C14 | O4  | -26.81(17)  | C11 | C1  | C6  | O4  | -176.28(12) |
| O5 | N1  | C14 | C4  | -145.61(13) | C11 | C1  | C6  | C1  | 60.5(2)     |
| O5 | N1  | C14 | C8  | 97.20(14)   | C12 | C3  | C7  | C1  | 90.2(2)     |
| C1 | C4  | C14 | O4  | -4.25(14)   | C13 | C9  | C16 | C6  | 0.1(2)      |
| C1 | C4  | C14 | N1  | 112.77(12)  | C14 | O4  | C6  | C1  | -2.52(15)   |
| C1 | C4  | C14 | C8  | -130.99(11) | C14 | O4  | C6  | C16 | -179.33(13) |
| C1 | C4  | C20 | C10 | 136.13(13)  | C14 | C4  | C20 | C10 | 22.95(13)   |
| C1 | C4  | C20 | C12 | -104.26(14) | C14 | C4  | C20 | C12 | 142.56(12)  |
| C1 | C4  | C20 | C18 | 19.07(17)   | C14 | C4  | C20 | C18 | -94.11(13)  |
| C1 | C6  | C16 | C9  | -0.6(2)     | C14 | C8  | C10 | C20 | 28.88(14)   |
| C1 | C11 | C13 | C9  | -0.5(2)     | C14 | C8  | C21 | C2  | -108.33(15) |
| C2 | C8  | C10 | C20 | -113.31(14) | C15 | C5  | C19 | C7  | -0.5(3)     |
| C2 | C8  | C14 | O4  | 6.35(19)    | C15 | C12 | C20 | C4  | 21.8(2)     |

|                |             |                 |             |
|----------------|-------------|-----------------|-------------|
| C2 C8 C14N1    | -111.66(14) | C15 C12 C20 C10 | 136.75(15)  |
| C2 C8 C14C4    | 129.23(14)  | C15 C12 C20 C18 | -101.87(16) |
| C3 C7 C19C5    | 0.8(3)      | C16 C9 C13 C11  | 0.4(2)      |
| C3 C12 C15 C5  | 1.7(2)      | C17 O1 C18 O2   | 10.0(2)     |
| C3 C12 C20 C4  | -157.54(13) | C17 O1 C18 C20  | -170.33(12) |
| C3 C12 C20 C10 | -42.62(17)  | C19 C5 C15 C12  | -0.7(3)     |
| C3 C12 C20 C18 | 78.76(16)   | C20 C4 C14 O4   | 120.40(12)  |
| C4 C1 C6 O4    | -0.34(16)   | C20 C4 C14 N1   | -122.57(12) |
| C4 C1 C6 C16   | 176.45(13)  | C20 C4 C14 C8   | -6.33(14)   |
| C4 C1 C11 C13  | -174.77(14) | C20 C12 C15 C5  | -177.67(15) |
| C6 O4 C14 N1   | -115.56(12) | C21 C2 C8 C10   | -109.23(15) |
| C6 O4 C14 C4   | 4.26(14)    | C21 C2 C8 C14   | 113.85(15)  |
| C6 O4 C14 C8   | 126.43(12)  | C21 C8 C10 C20  | 175.39(12)  |
| C6 C1 C4 C14   | 2.72(14)    | C21 C8 C14 O4   | 78.44(17)   |
| C6 C1 C4 C20   | -113.19(14) | C21 C8 C14 N1   | -39.56(17)  |
| C6 C1 C11 C13  | 0.0(2)      | C21 C8 C14 C4   | -158.67(13) |
| C7 C3 C12 C15  | -1.5(2)     |                 |             |

**Table S17 Hydrogen Atom Coordinates ( $\text{\AA} \times 10^4$ ) and Isotropic Displacement Parameters ( $\text{\AA}^2 \times 10^3$ ) for 220118F\_auto.**

| Atom | <i>x</i> | <i>y</i> | <i>z</i> | U(eq) |
|------|----------|----------|----------|-------|
| H2A  | 2453.46  | 676.41   | 7204.95  | 36    |
| H2B  | 990.81   | 1465.16  | 8058.65  | 36    |
| H3   | 506.48   | 6184.62  | 9231.76  | 34    |
| H4   | 4954.51  | 4926.59  | 7274.27  | 26    |
| H5   | 3796.22  | 8951.75  | 7943.81  | 46    |
| H7   | 542.4    | 8545.42  | 10109.88 | 41    |
| H9   | 2484.11  | 911.64   | 2327.16  | 40    |

|      |          |         |         |    |
|------|----------|---------|---------|----|
| H10A | 3331.74  | 4900.81 | 9317.53 | 28 |
| H10B | 1231.37  | 3957.79 | 8762.15 | 28 |
| H11  | 2633.77  | 4750.46 | 4940.05 | 35 |
| H13  | 1992.52  | 3149.99 | 2887.46 | 40 |
| H15  | 3749.47  | 6589.55 | 7050.75 | 39 |
| H16  | 3598.12  | 187.38  | 3797.09 | 35 |
| H17A | -1317.93 | 1844.98 | 4452.6  | 52 |
| H17B | -2552.14 | 1754.05 | 5364.06 | 52 |
| H17C | -1252.03 | 630.57  | 4838.84 | 52 |
| H19  | 2214.54  | 9940.43 | 9481.5  | 46 |
| H21A | 5164.88  | 1881.32 | 8930.33 | 36 |
| H21B | 3701.82  | 2670.29 | 9784.27 | 36 |

## 7. References

1. R. Shintani, M. Murakami, T. Hayashi,  $\gamma$ -Methylidene- $\delta$ -Valerolactones as a Coupling Partner for Cycloaddition: Palladium-Catalyzed [4 + 3] Cycloaddition with Nitrones, *J. Am. Chem. Soc.*, 2007, **129**, 12356–12357.
2. Y. C. Wang, J. L. Wang, K. S. Burgess, J. W. Zhang, Q. M. Zheng, Y. D. Pu, L. J. Yan and X. B. Chen, Enantioselective organocatalytic sequential Michael-cyclization of functionalized nitroalkanes to 2-hydroxycinnamaldehydes: synthesis of benzofused dioxo [3.3.1] and oxa [4.3.1] methylene-bridged compounds, *RSC Adv.*, 2018, **8**, 5702–5713.
3. K. Sreenivas and F. A. Khan, 1,6-Conjugate addition of C-nucleophiles to p-quinone methide surrogate: Synthesis of diarylpropanes, *Tetrahedron*, 2019, **75**, 633–642.
4. R. Ardkhean, M. Mortimore, R. S. Paton, S. P. Fletcher, Formation of quaternary centres by copper catalysed asymmetric conjugate addition to  $\beta$ -substituted cyclopentenones with the aid of a quantitative structure–selectivity relationship, *Chem. Sci.* 2018, **9**, 2628-2632.

# 8. Spectra

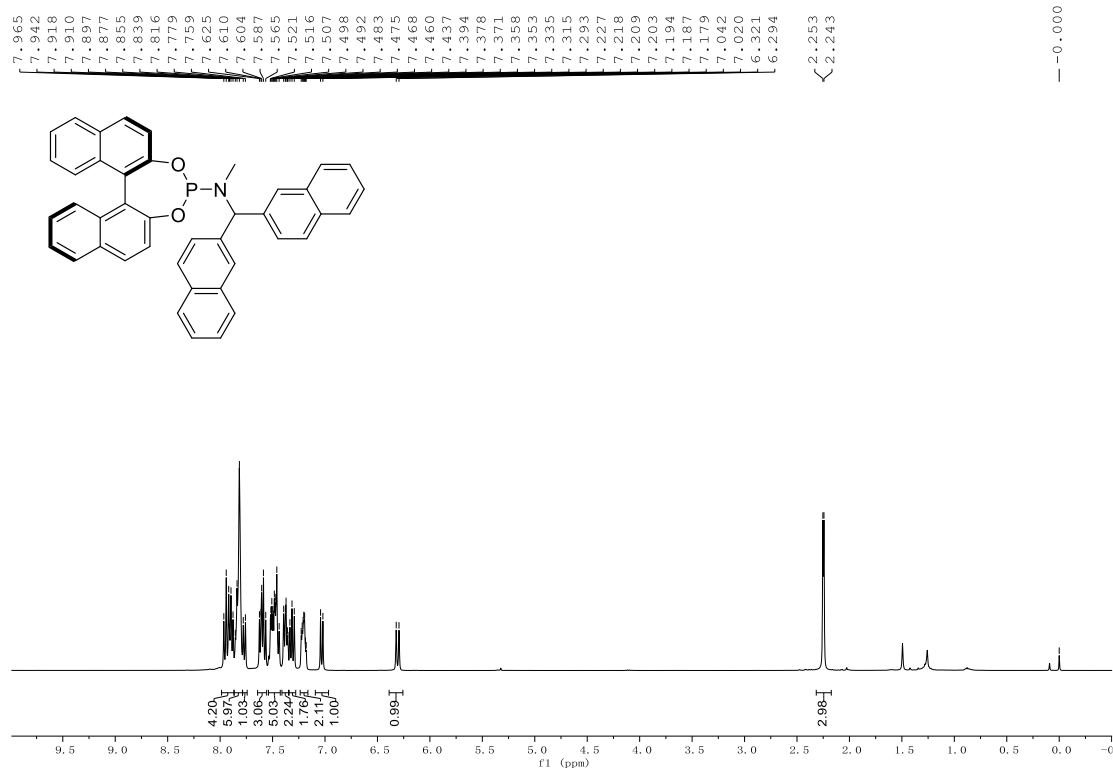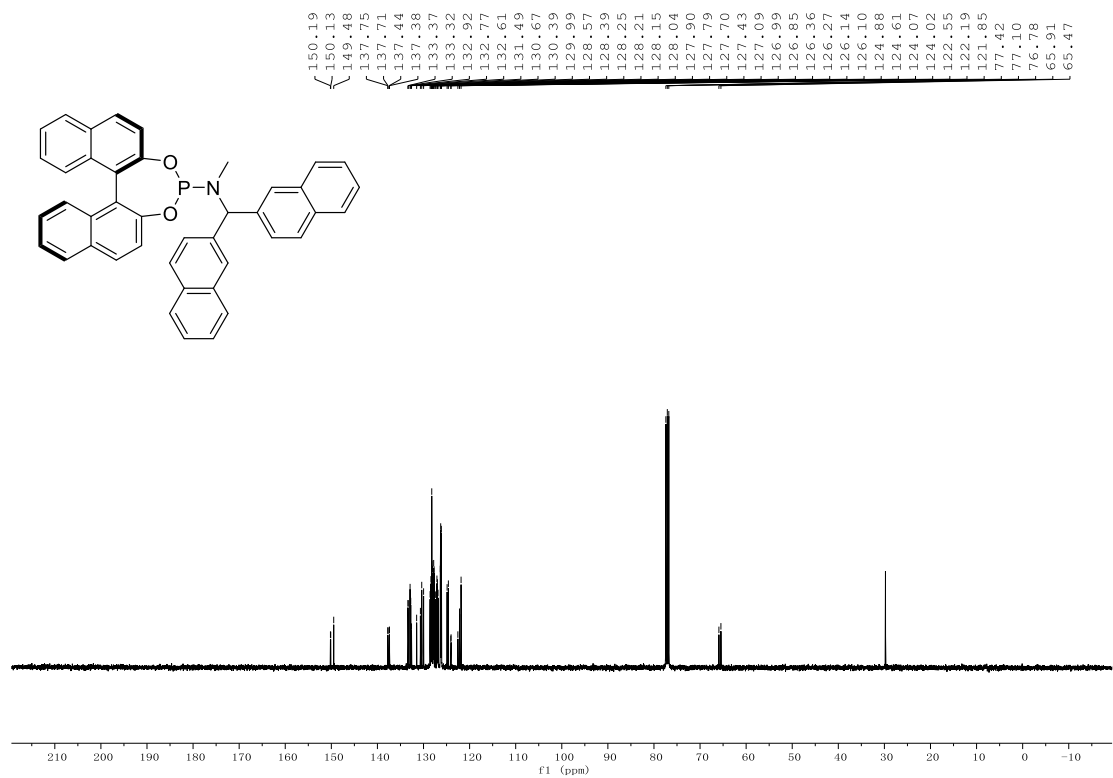

<sup>31</sup>P NMR spectrum of **L9**

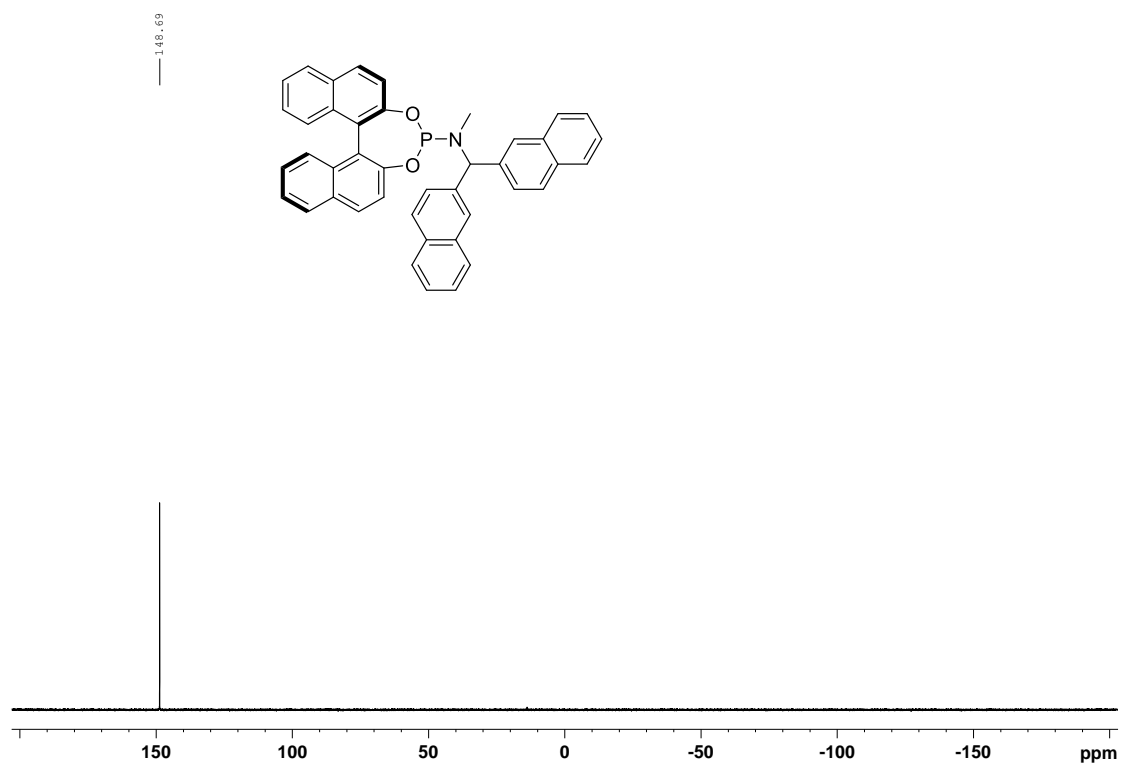

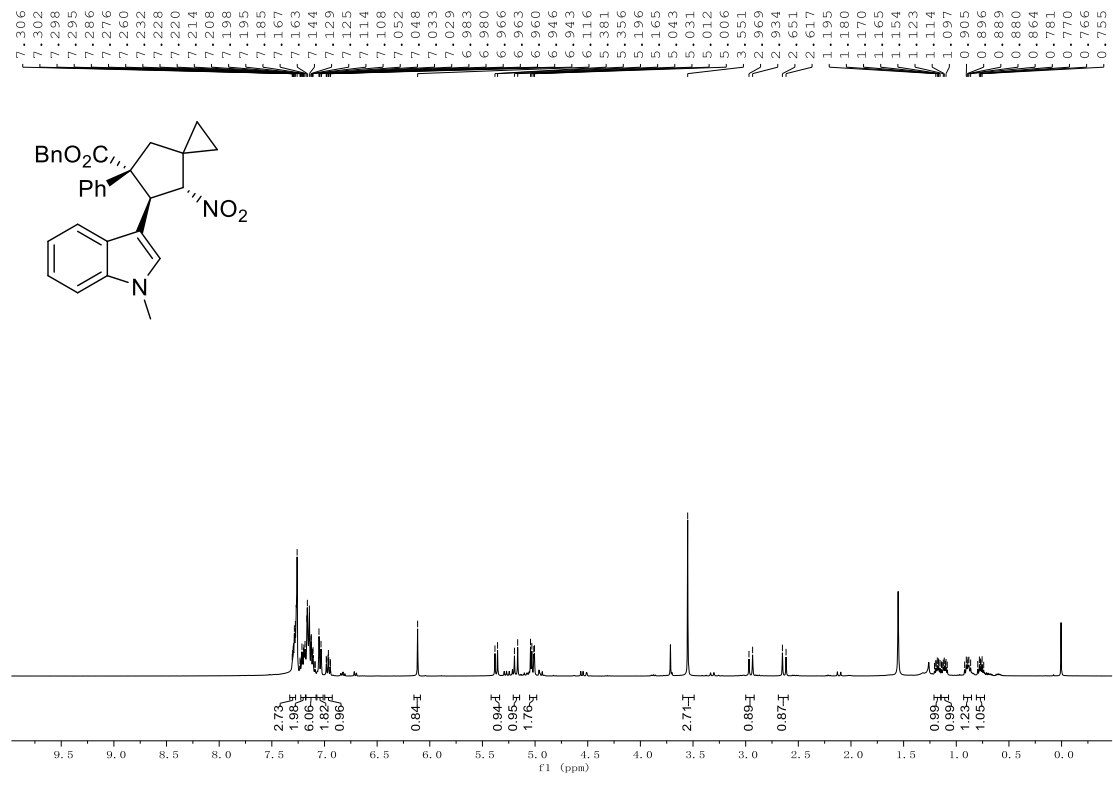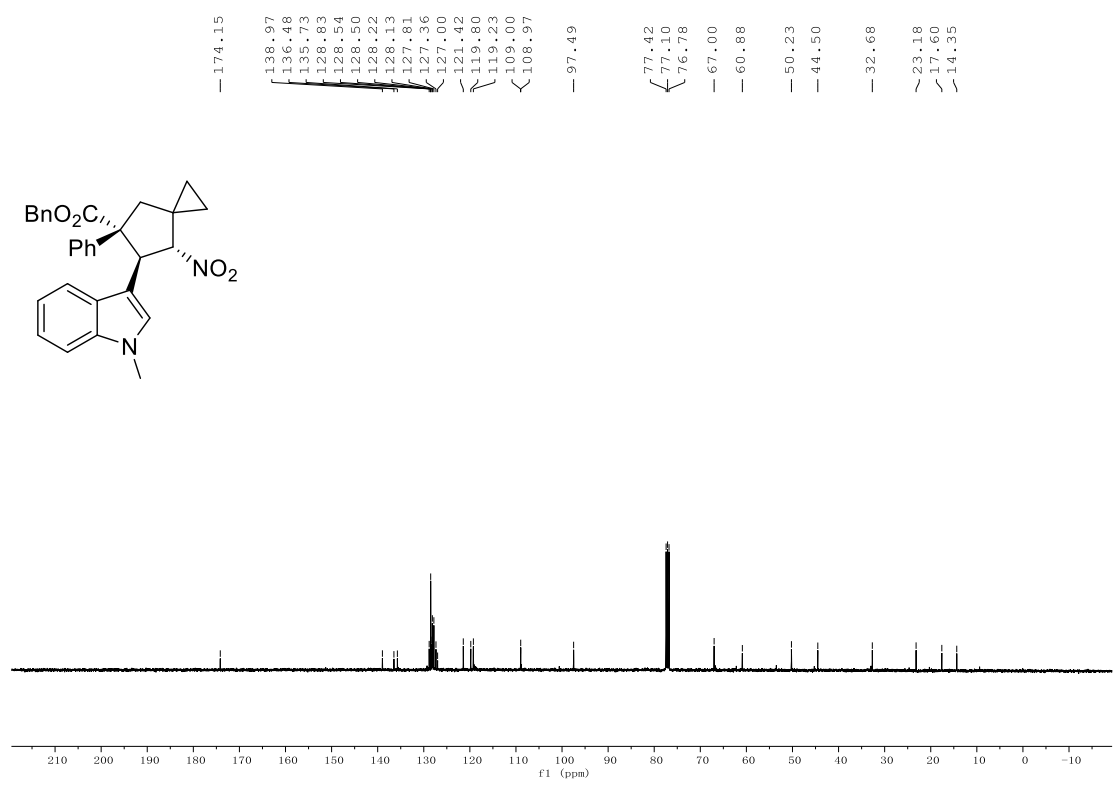

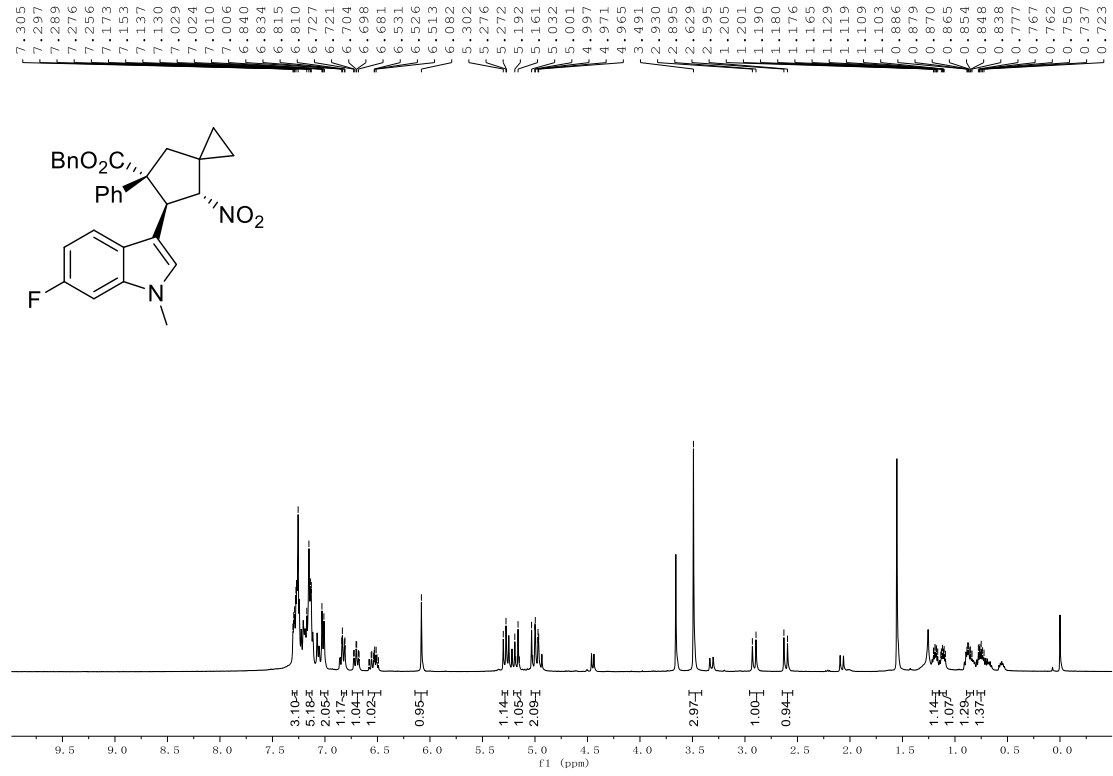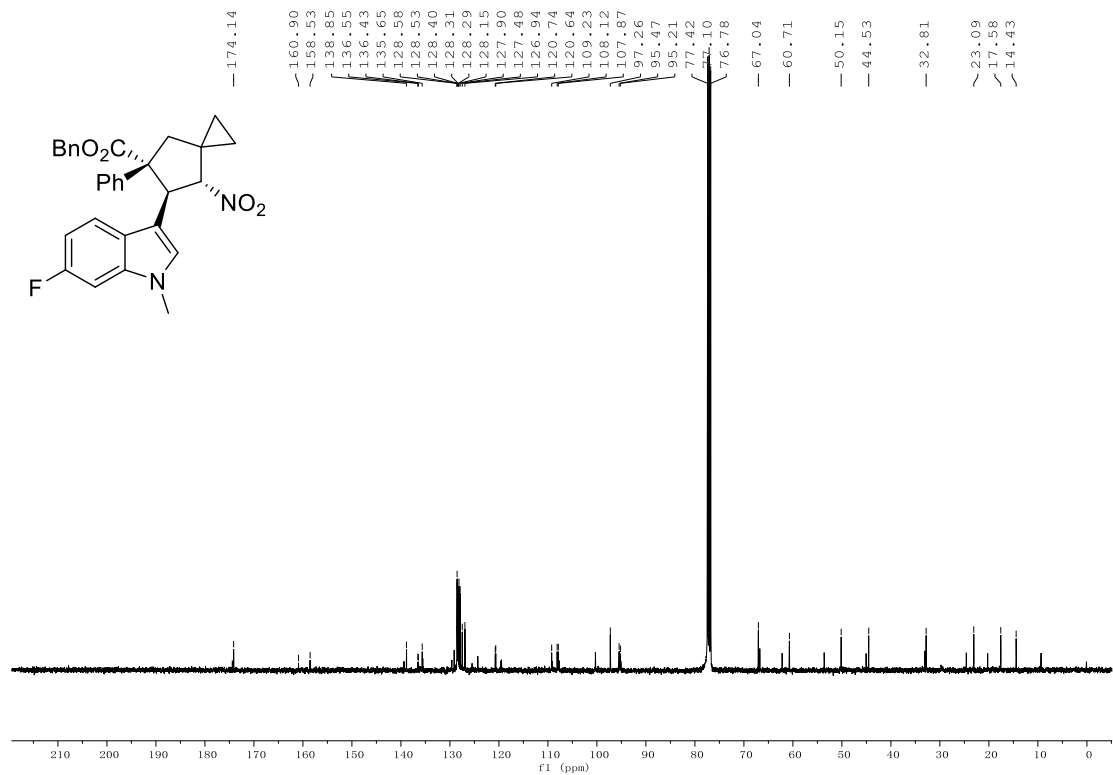



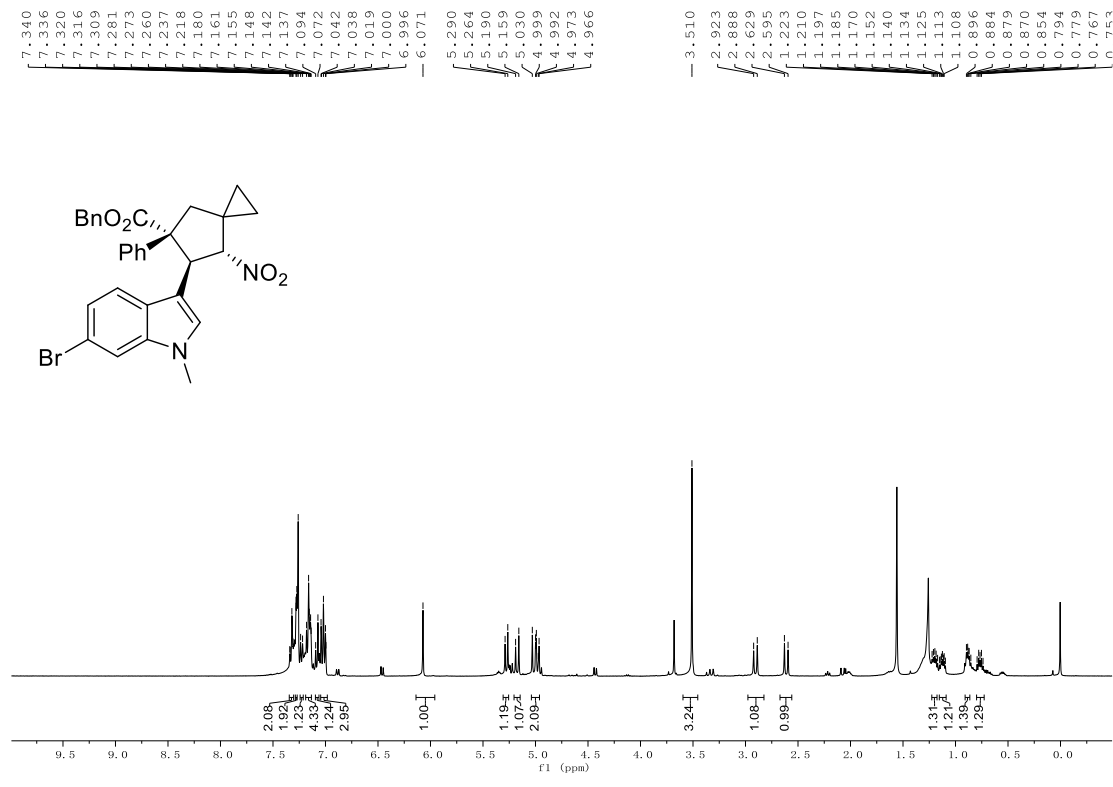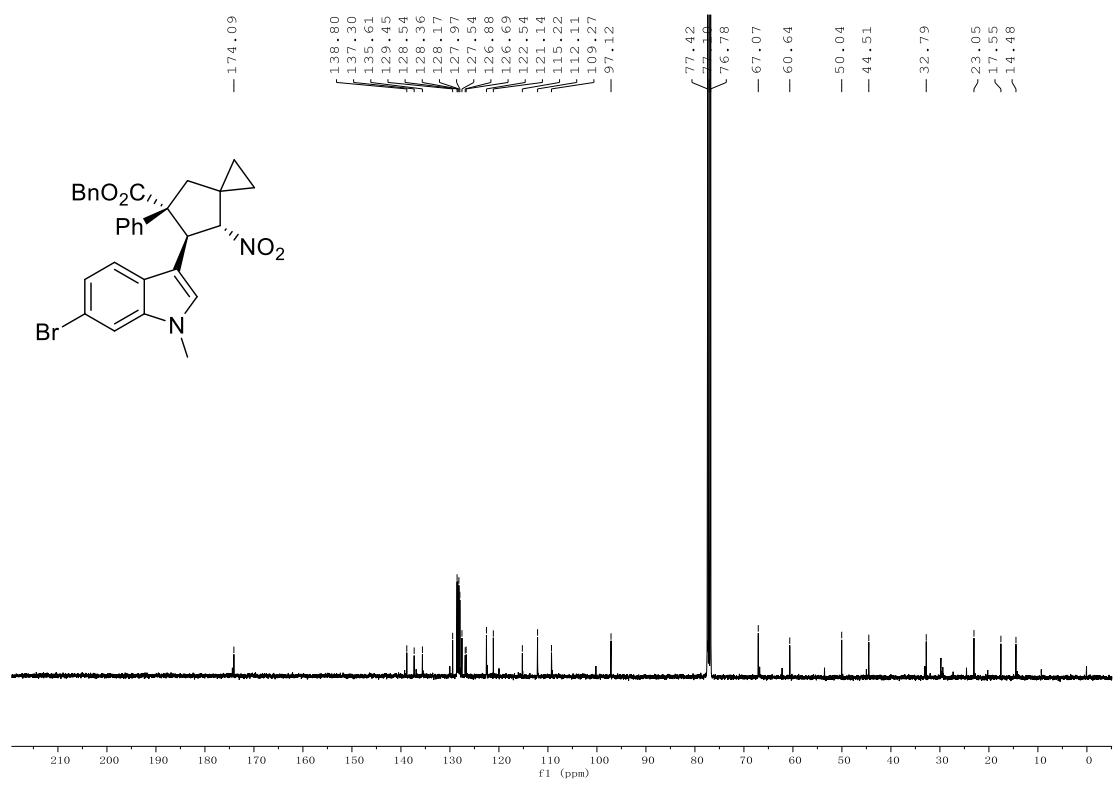

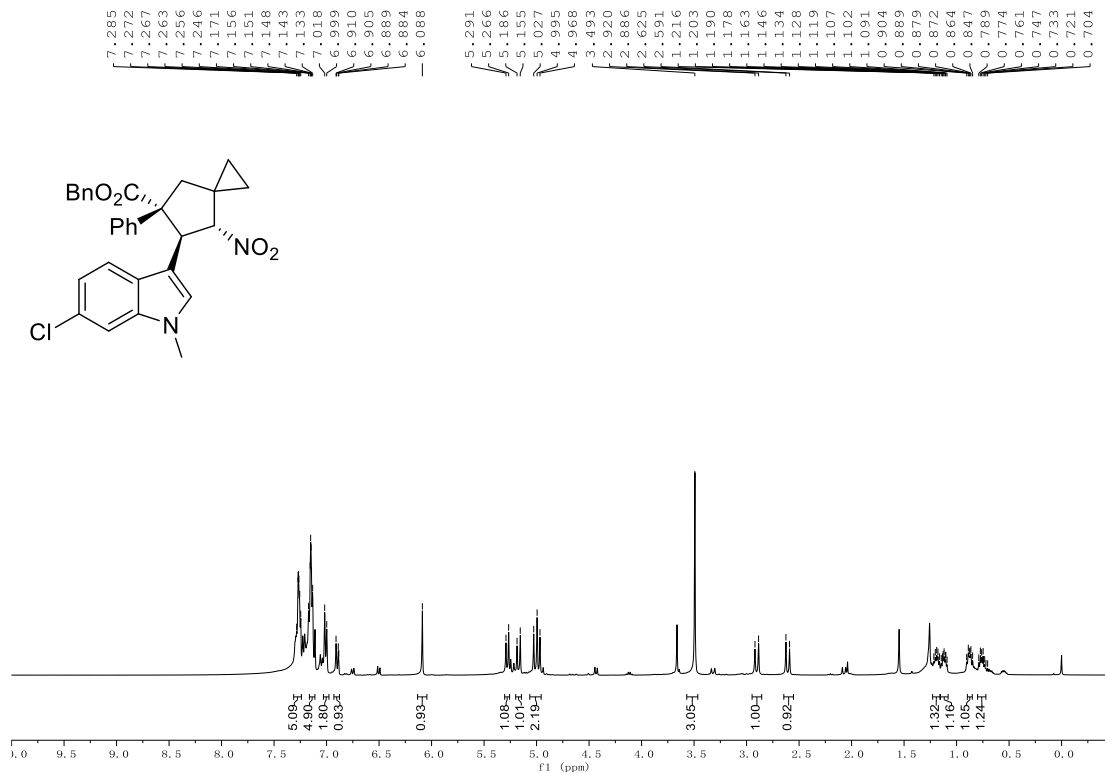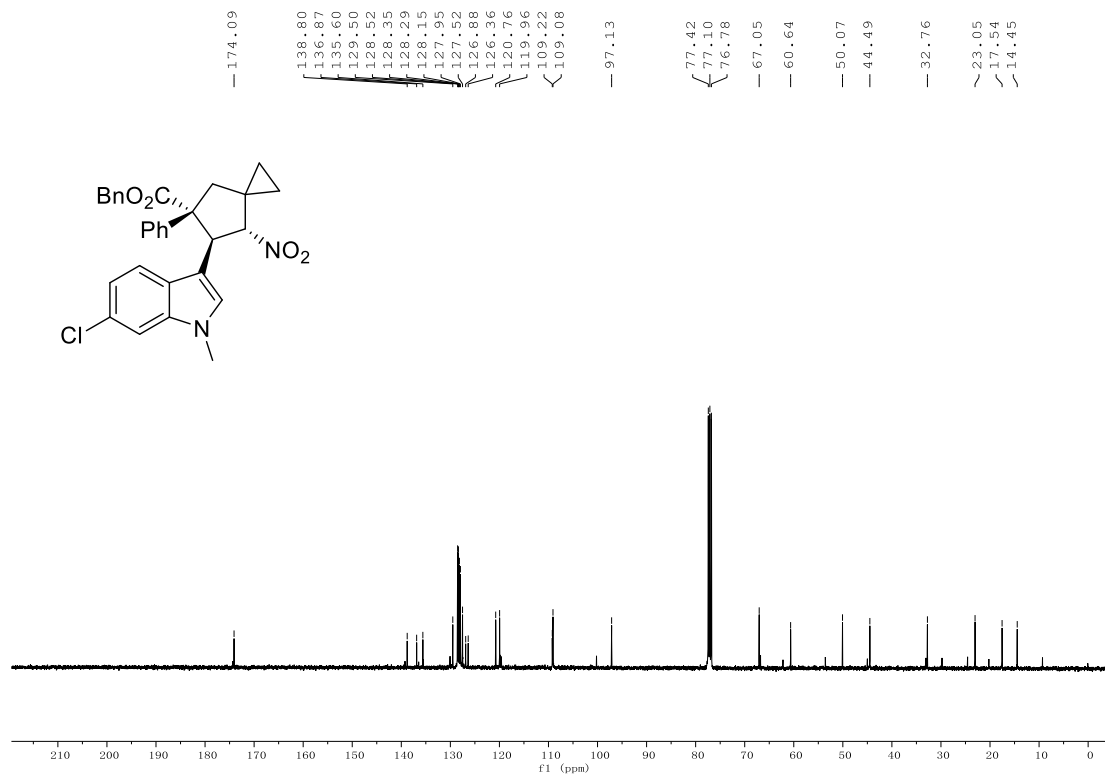

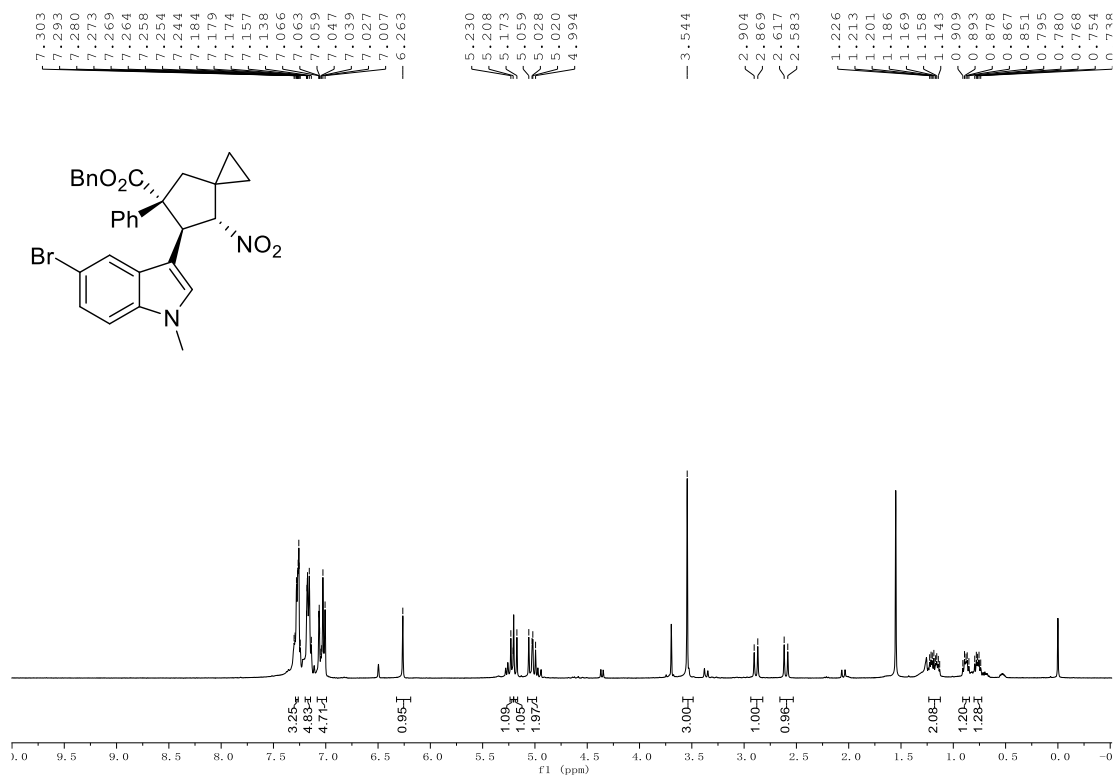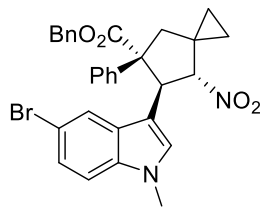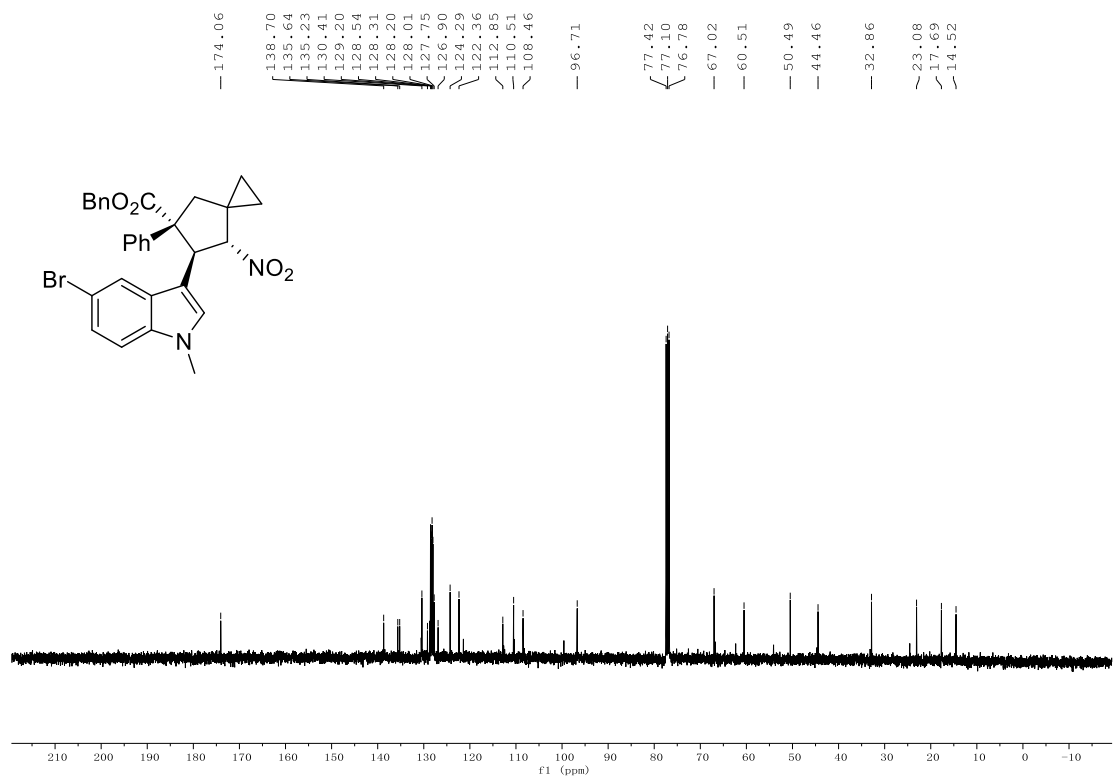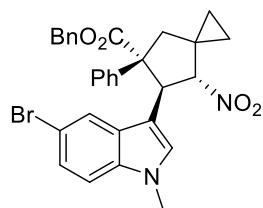

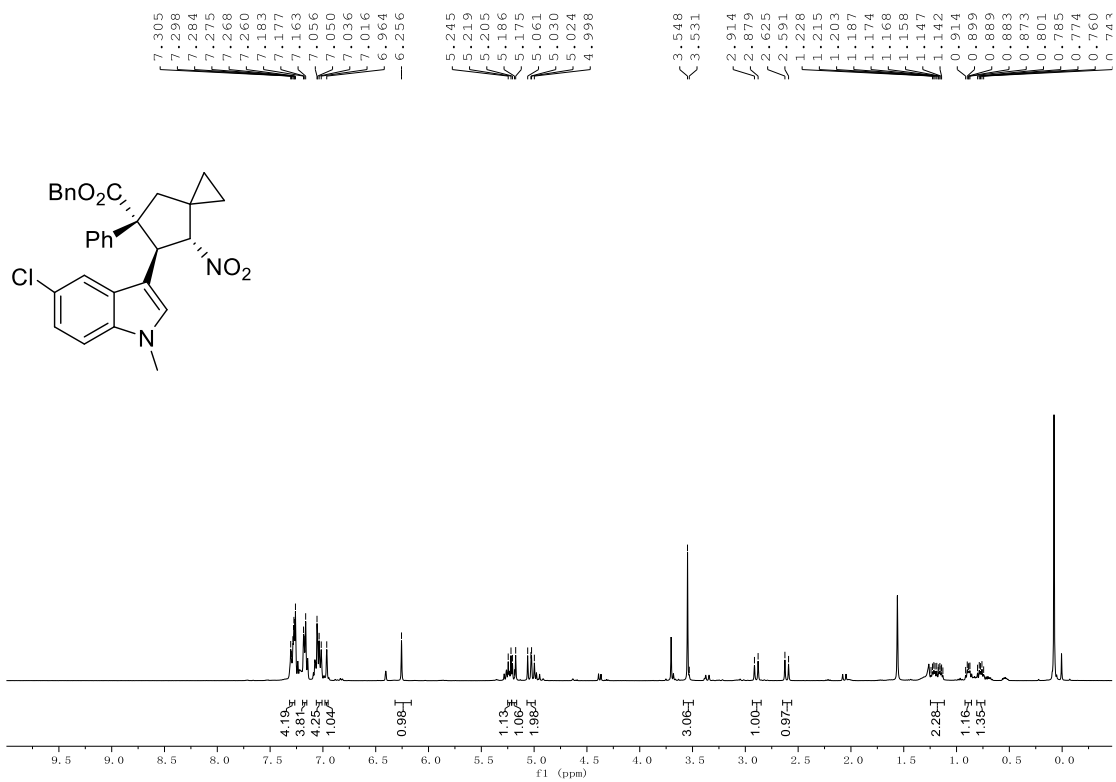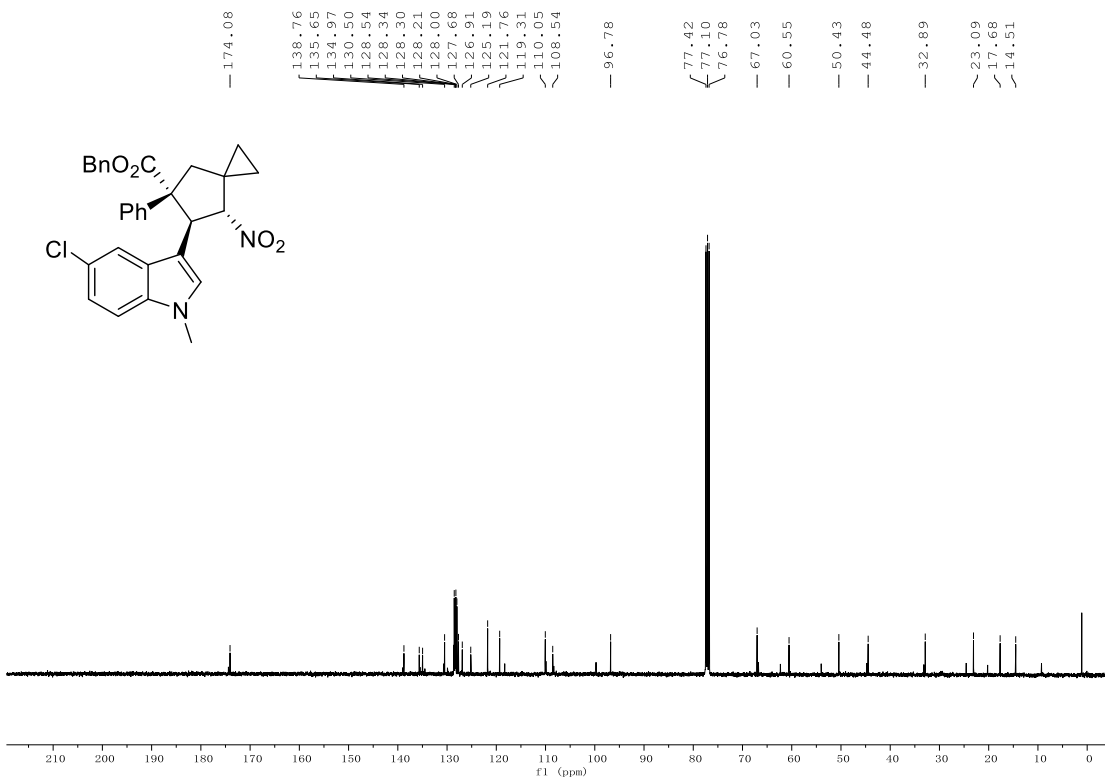

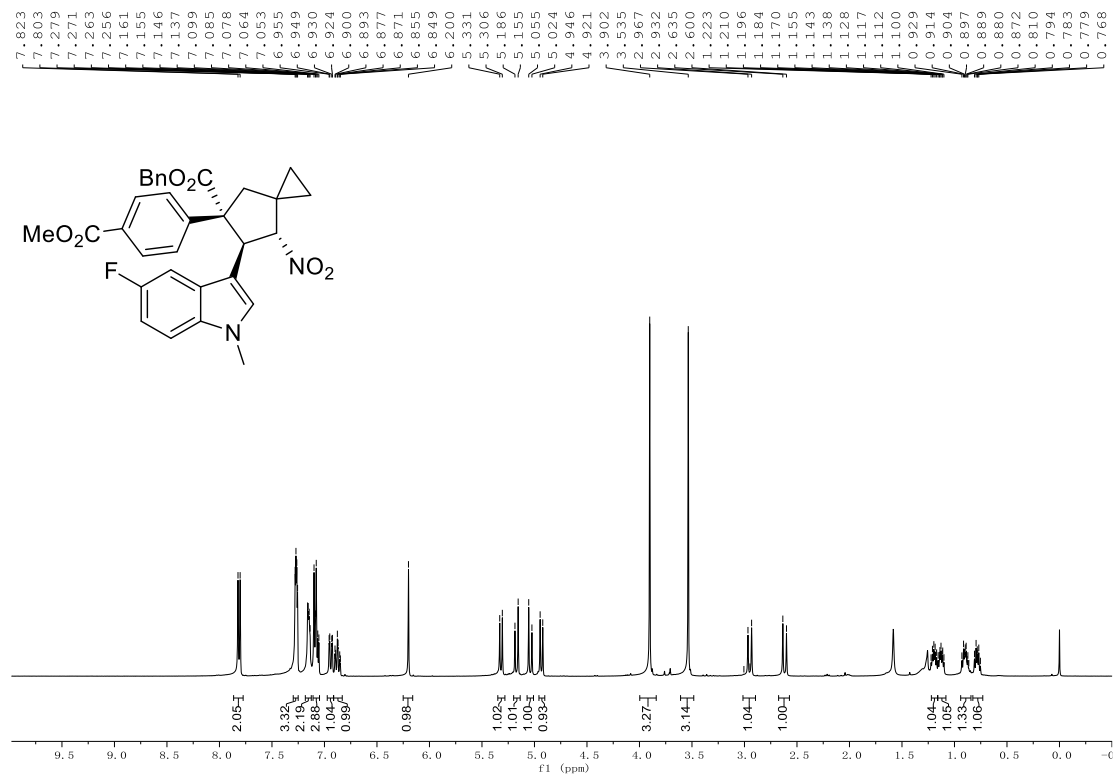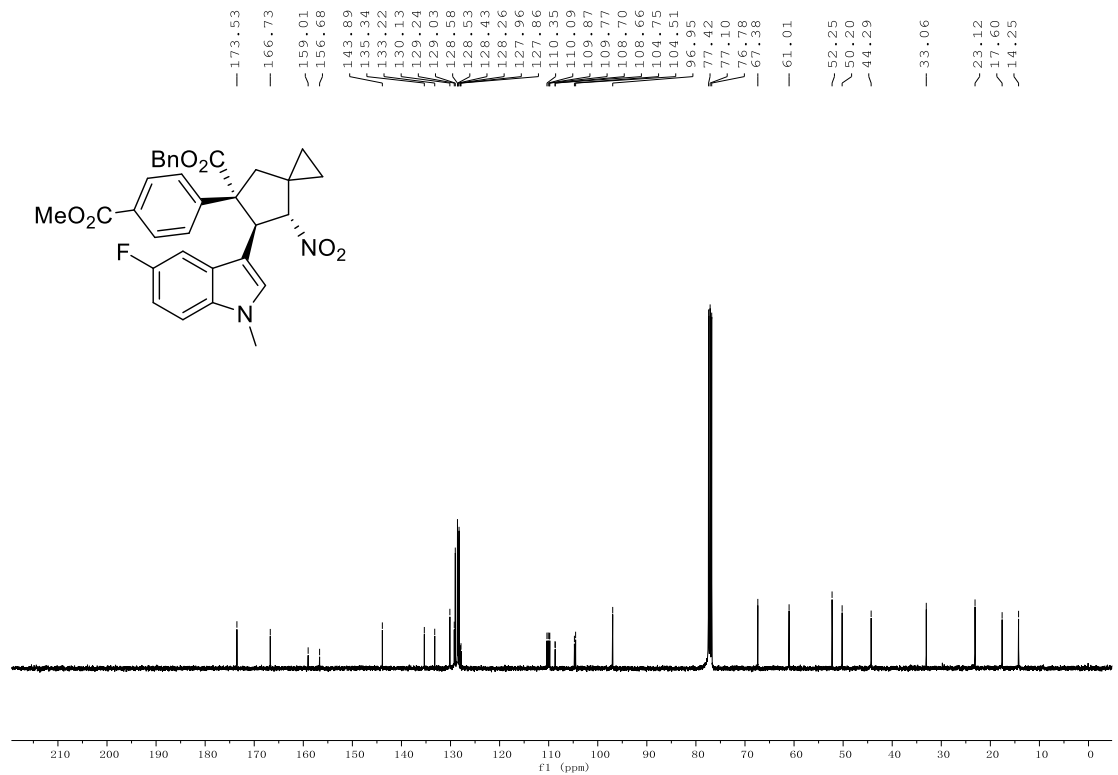

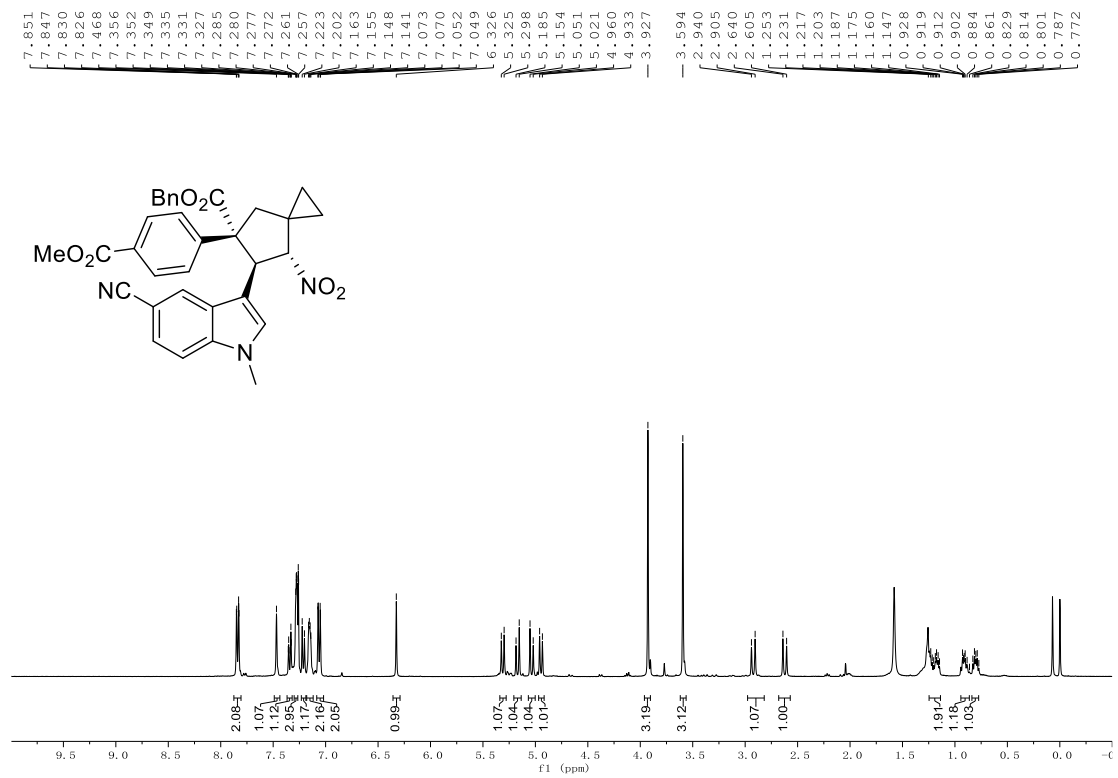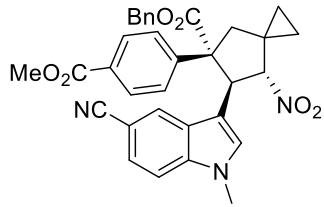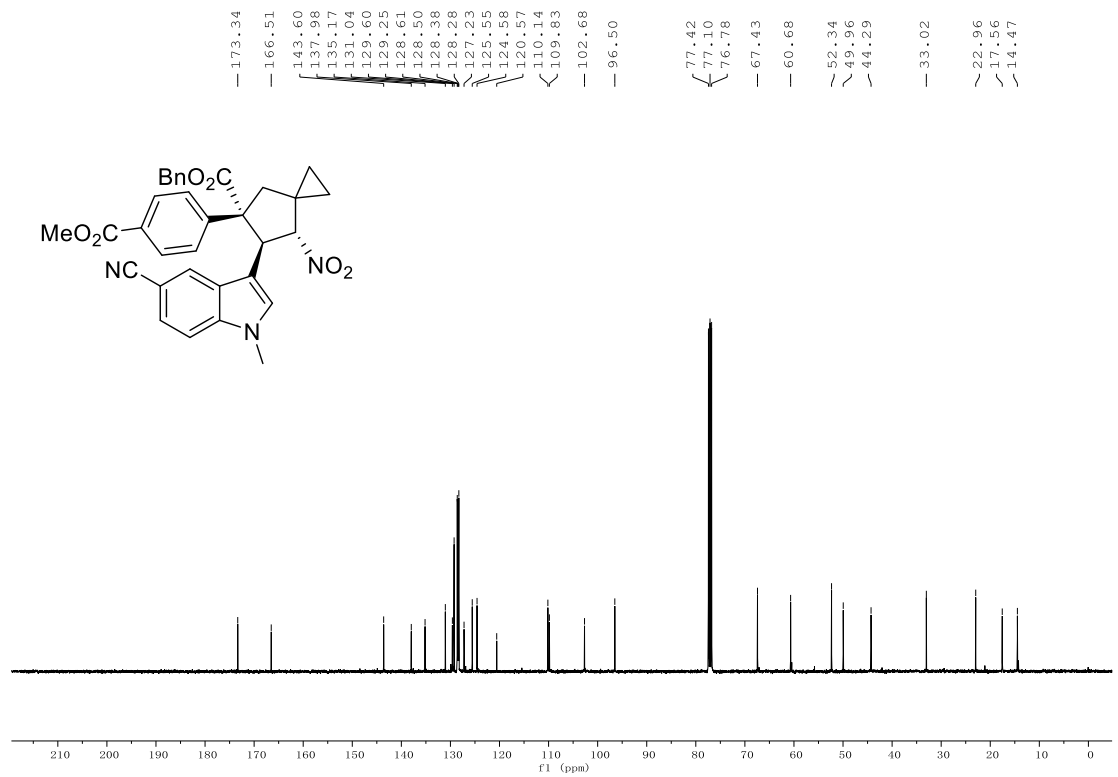

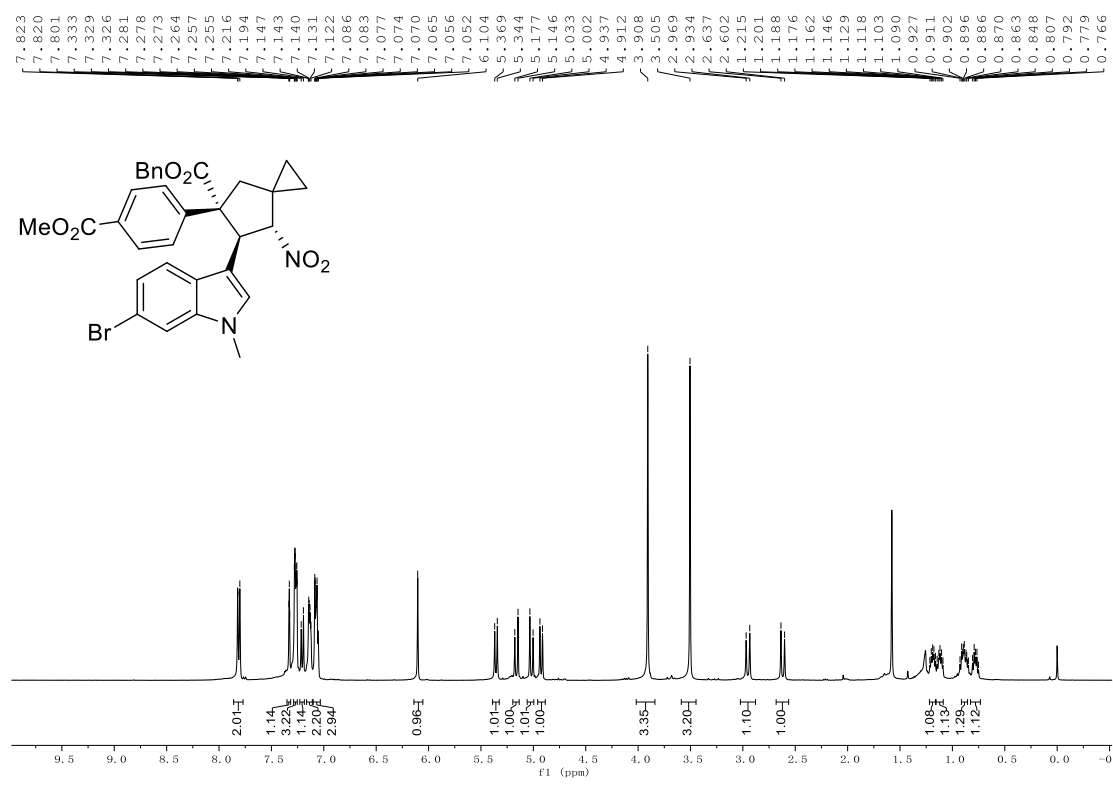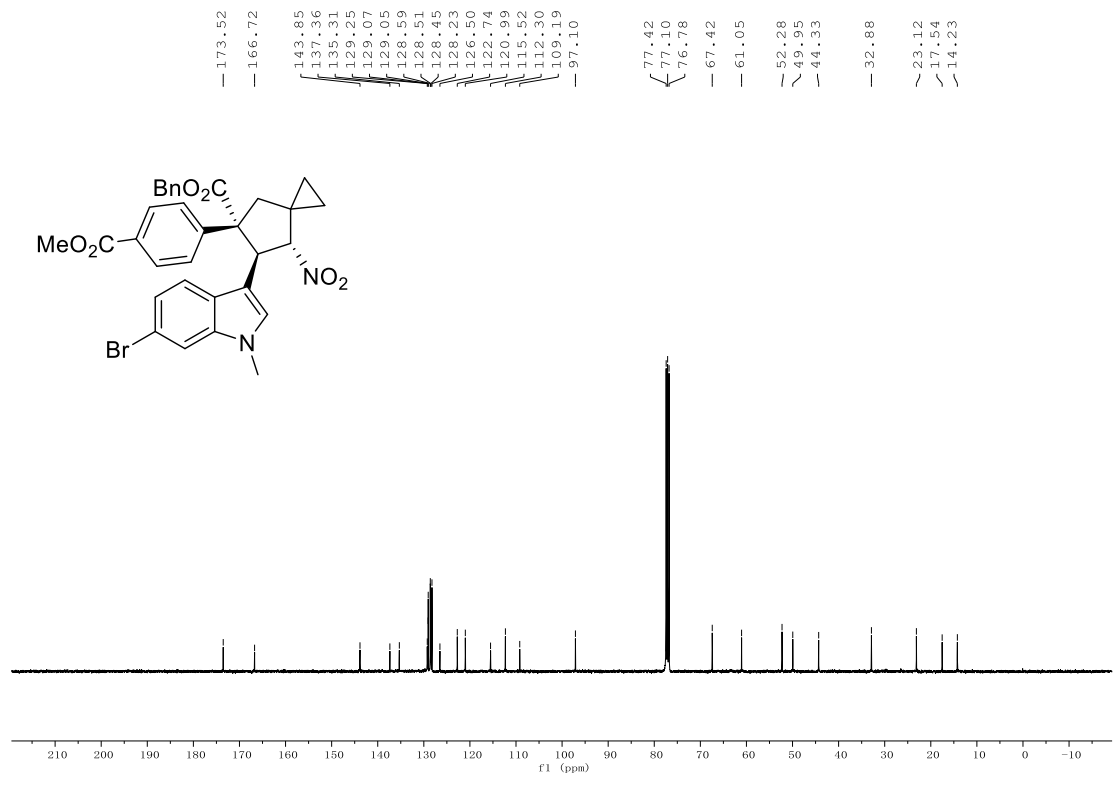

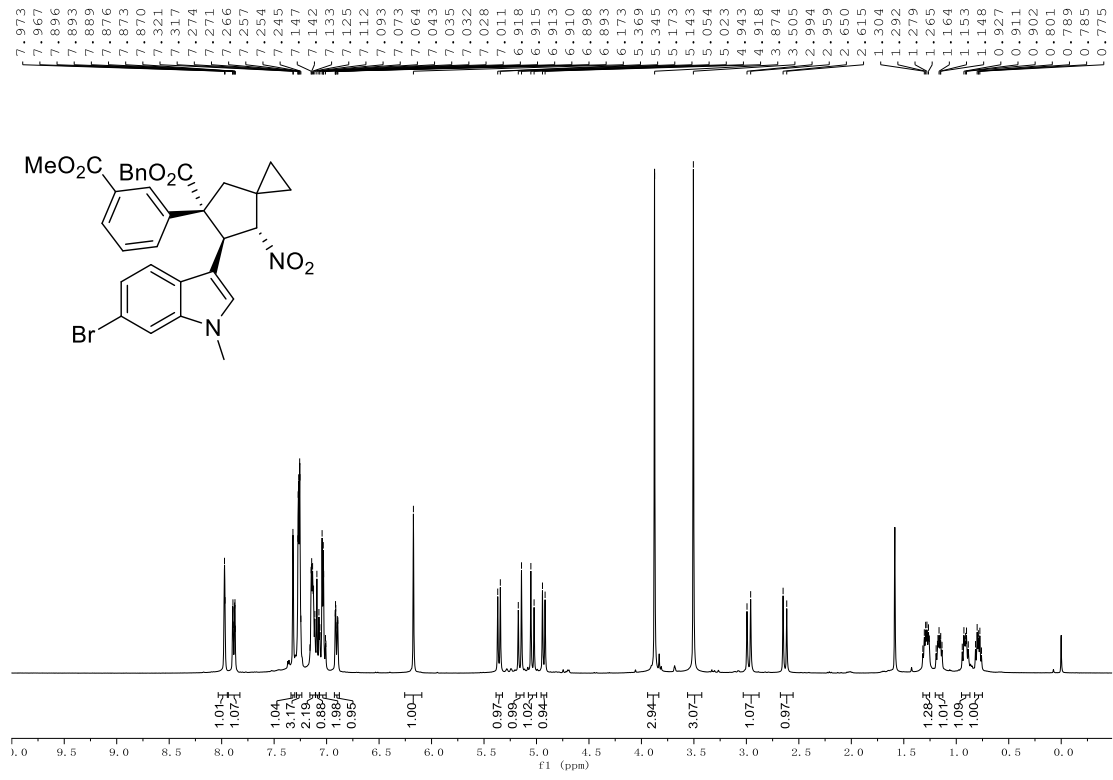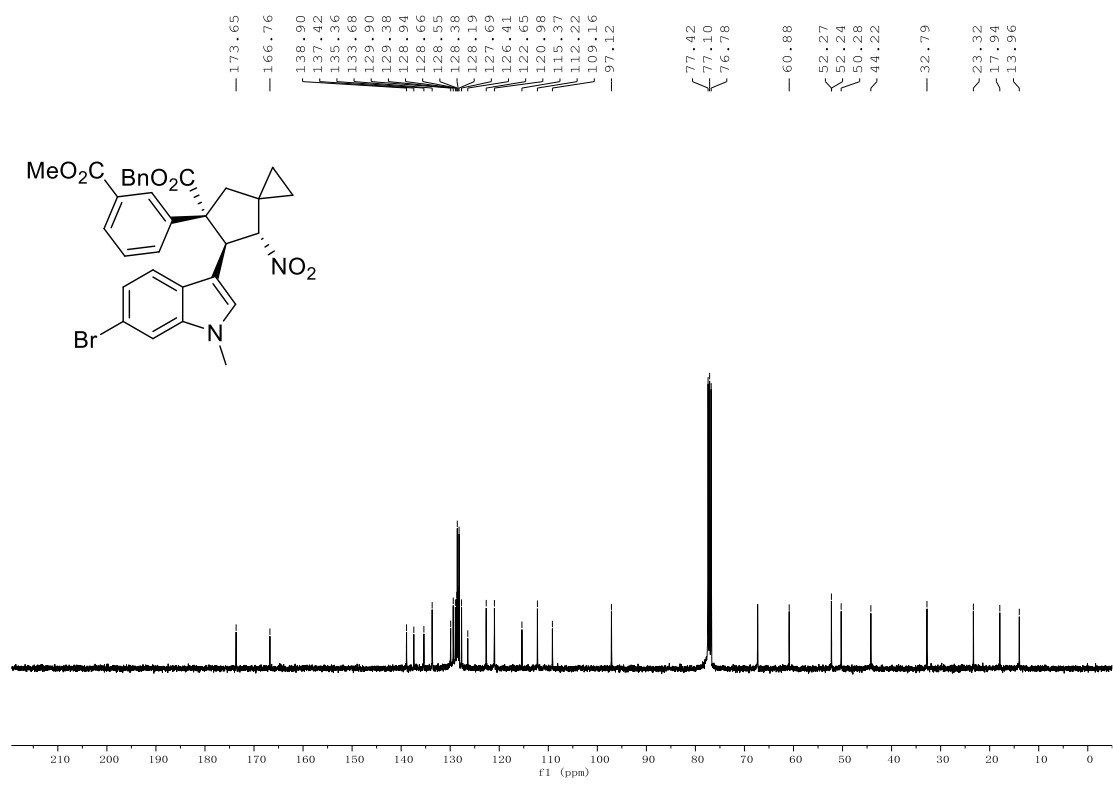



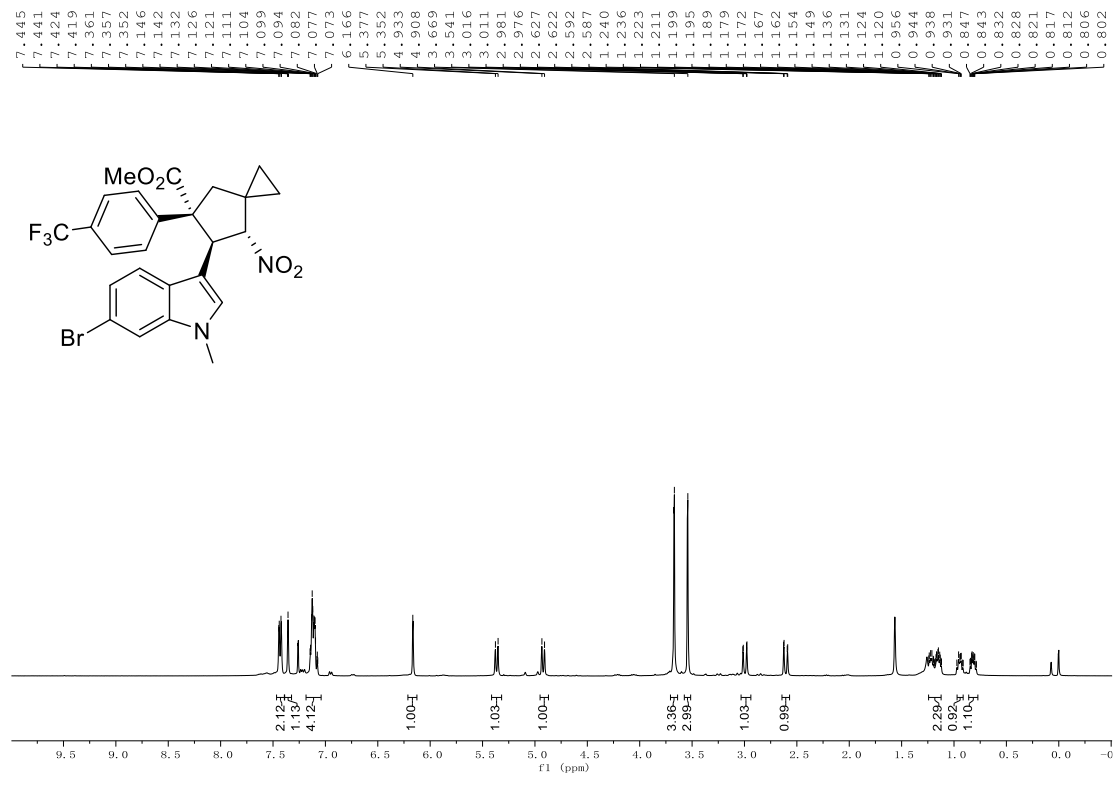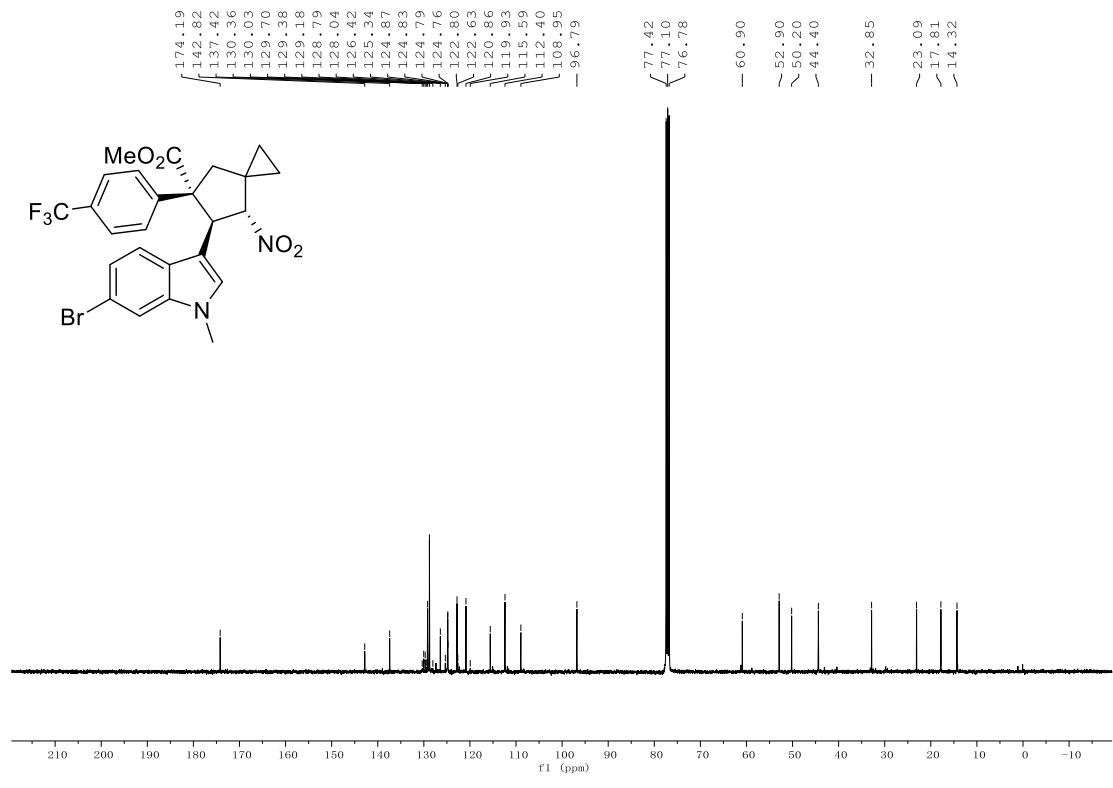

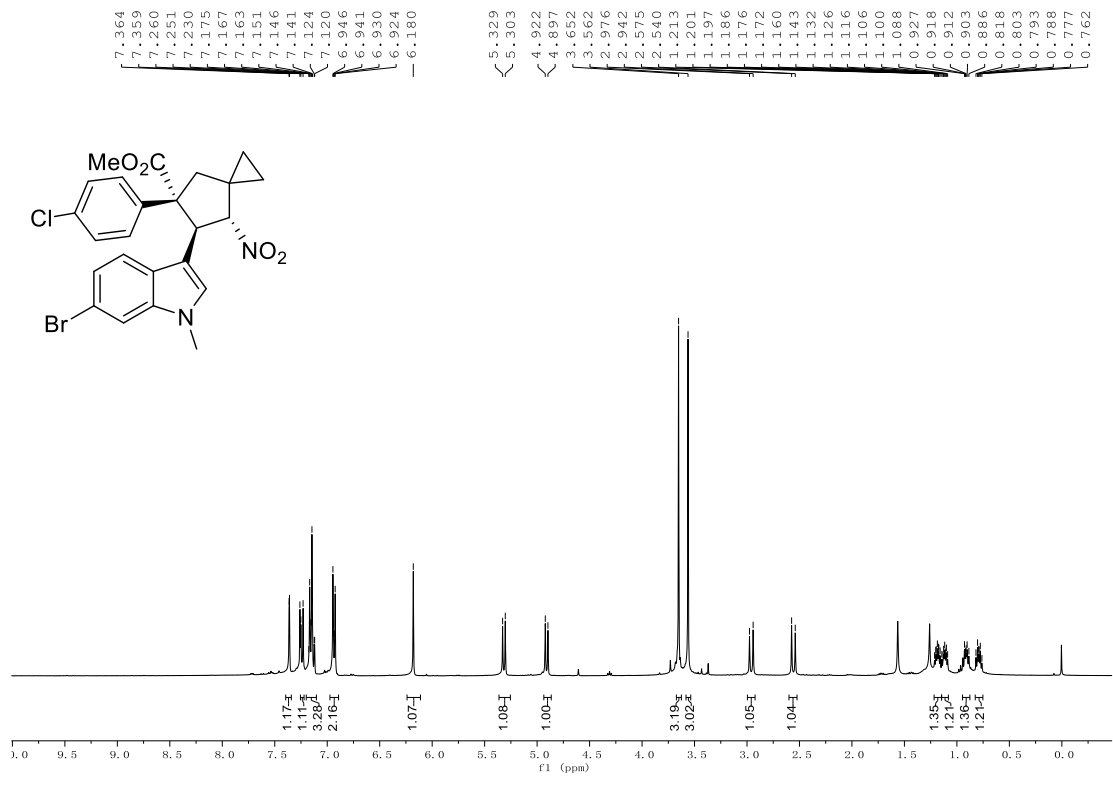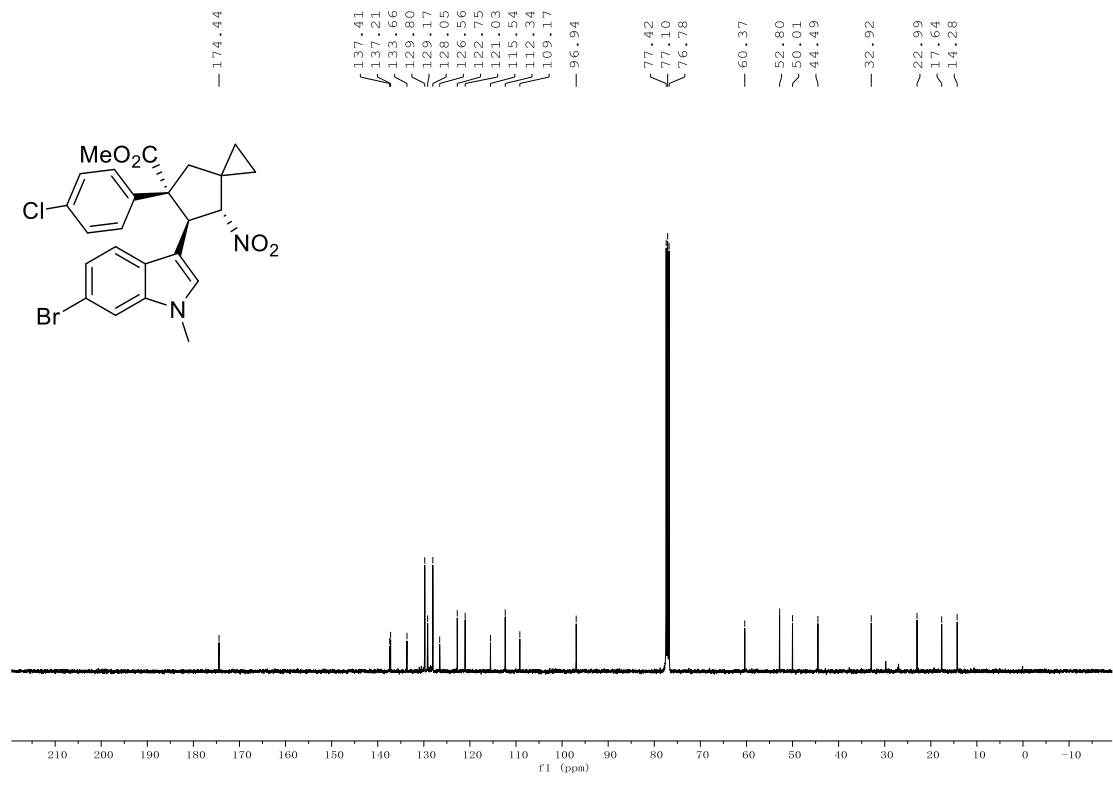

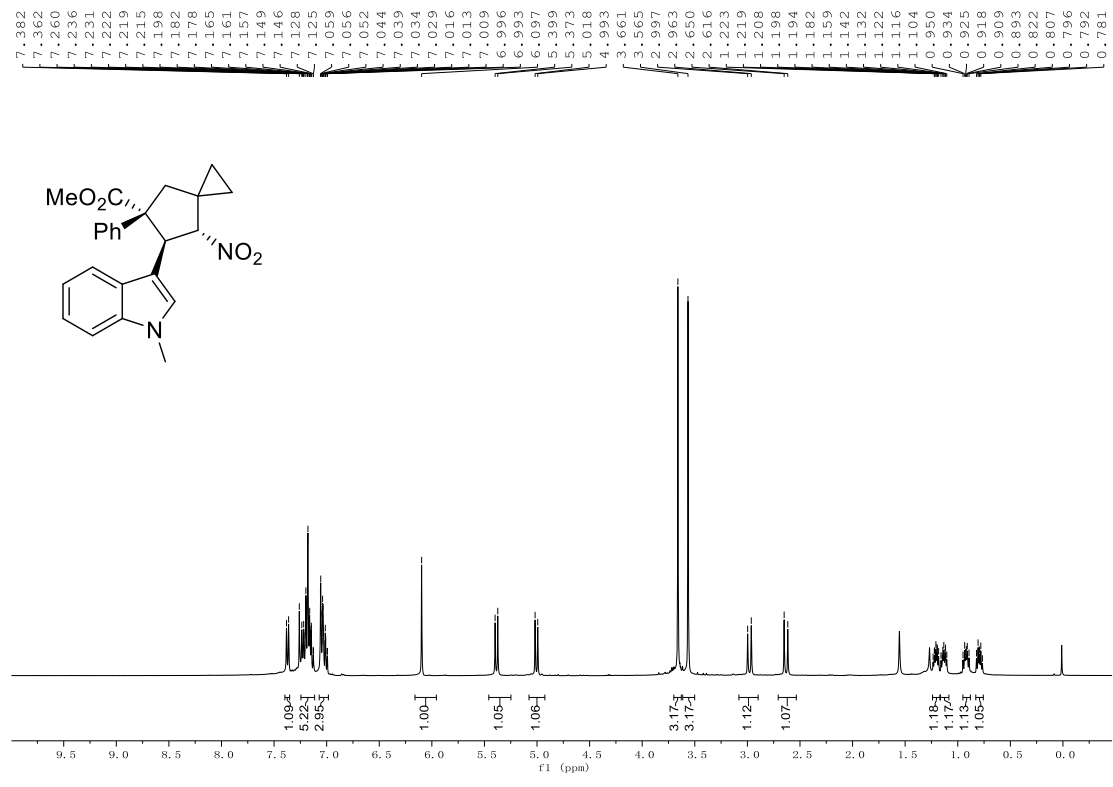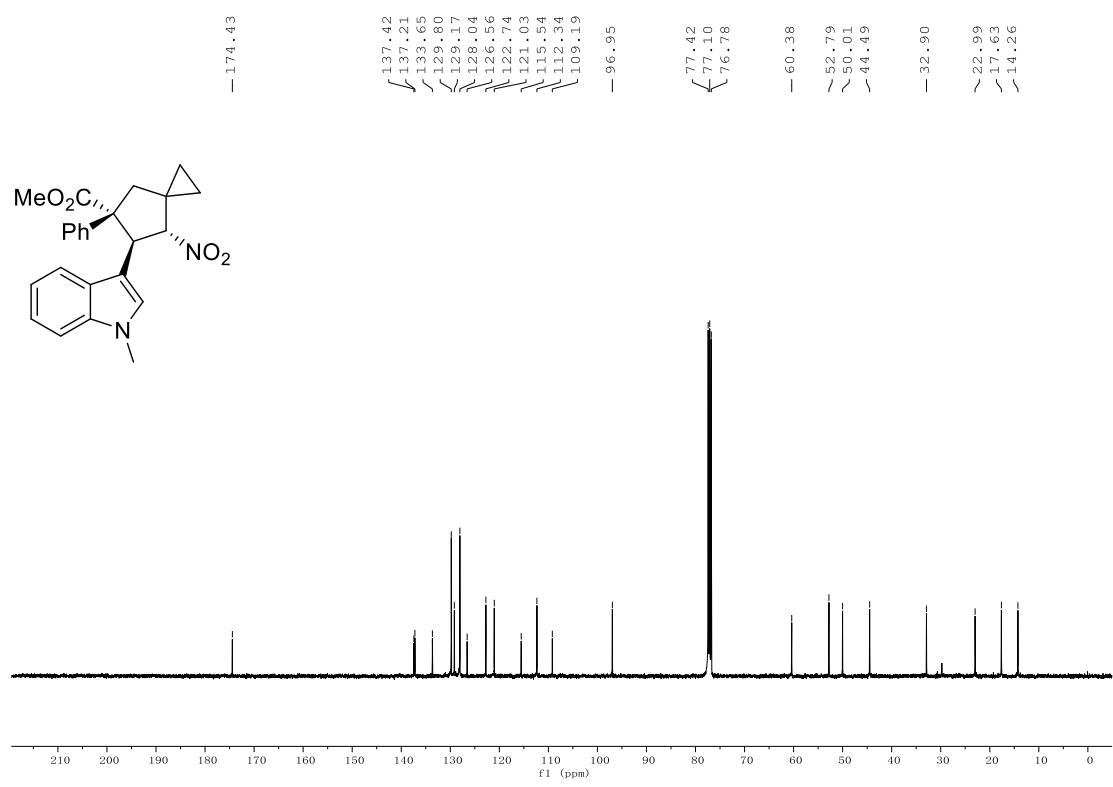

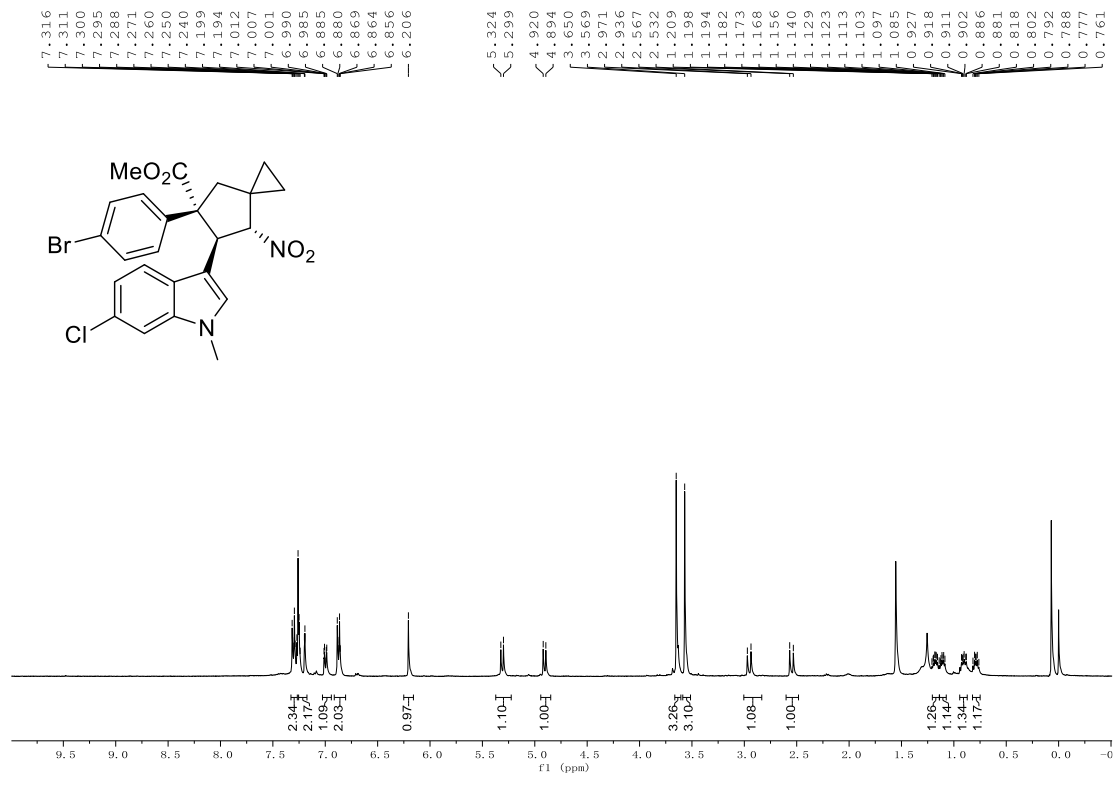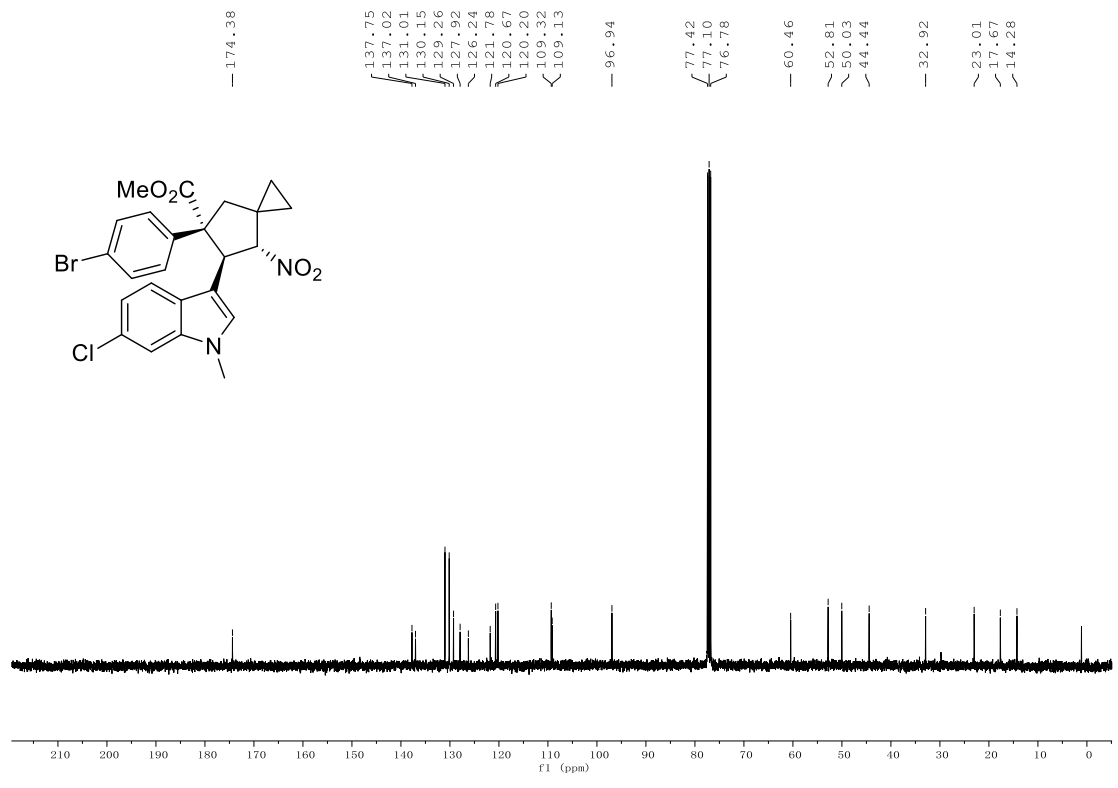

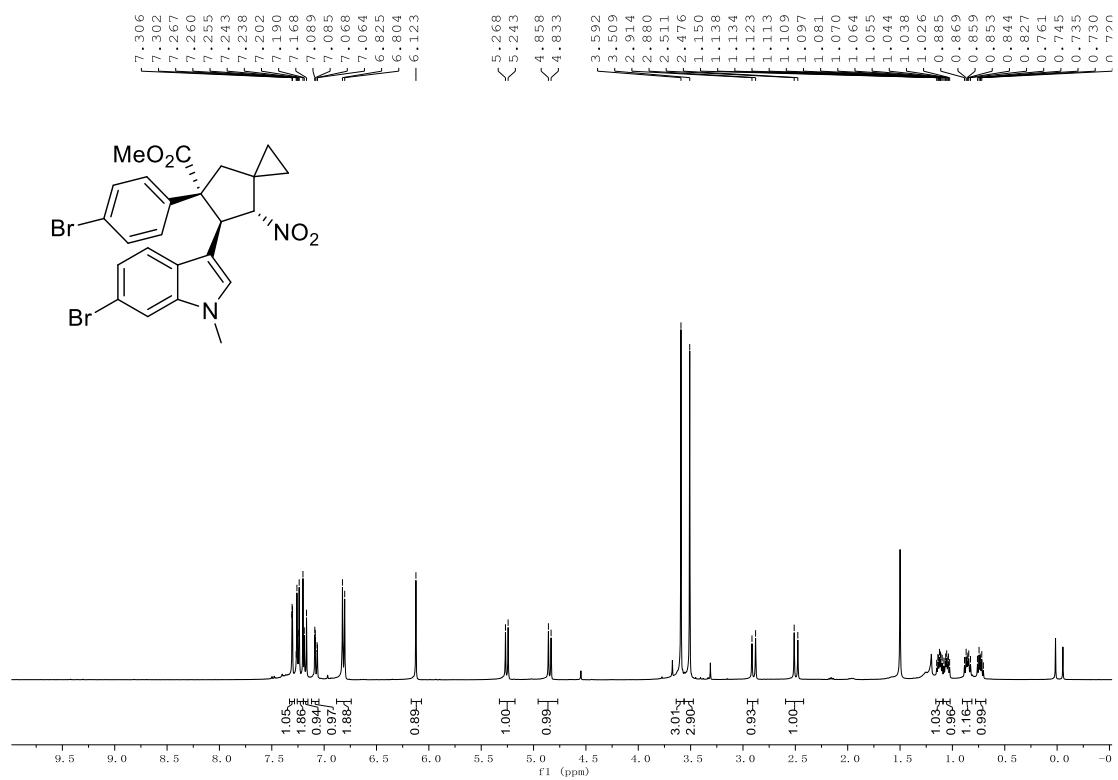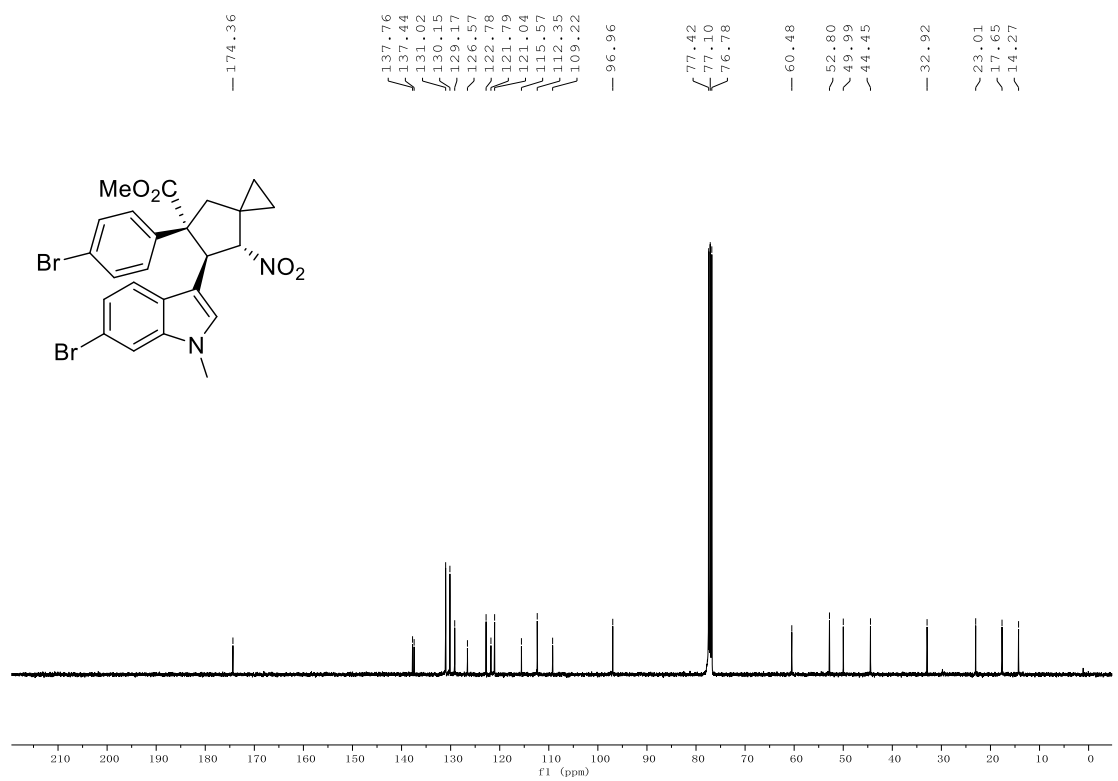

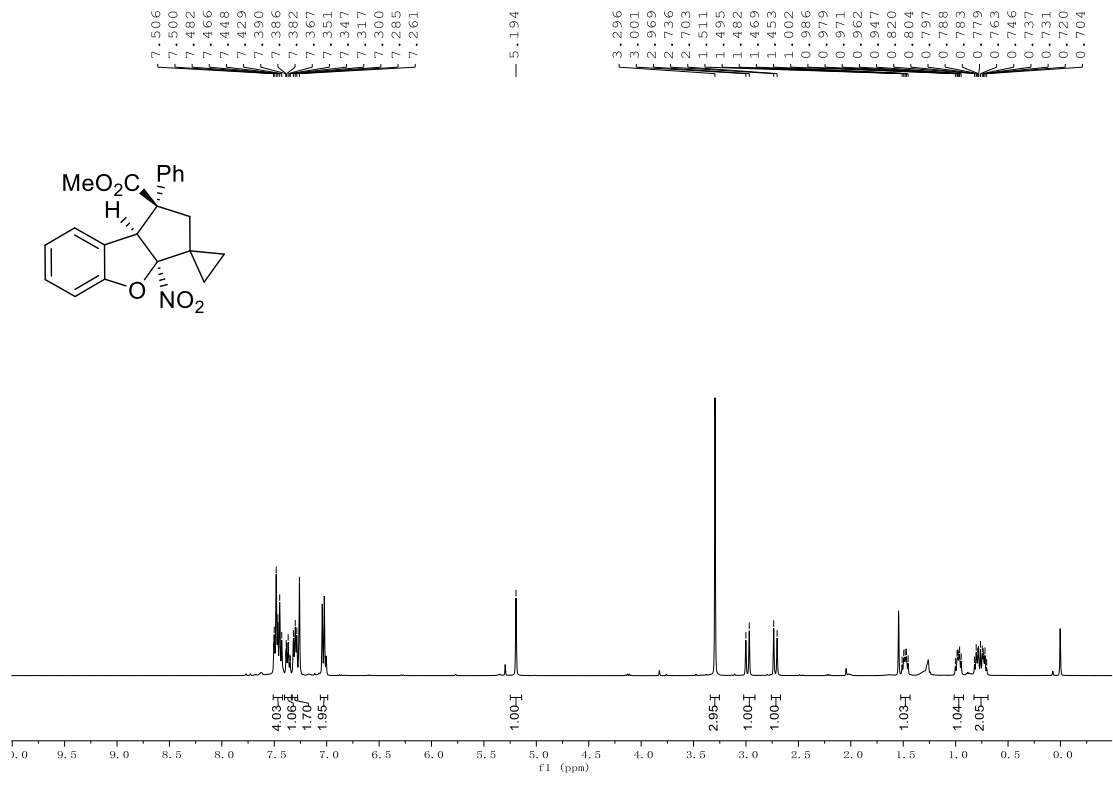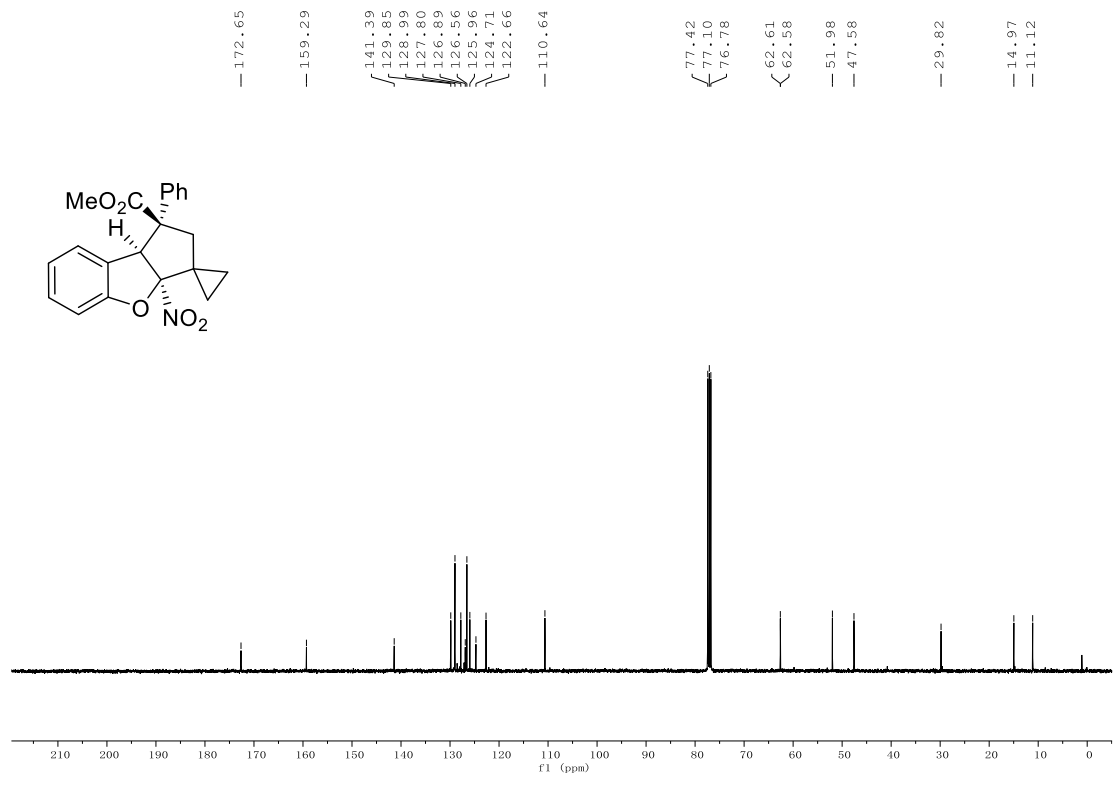

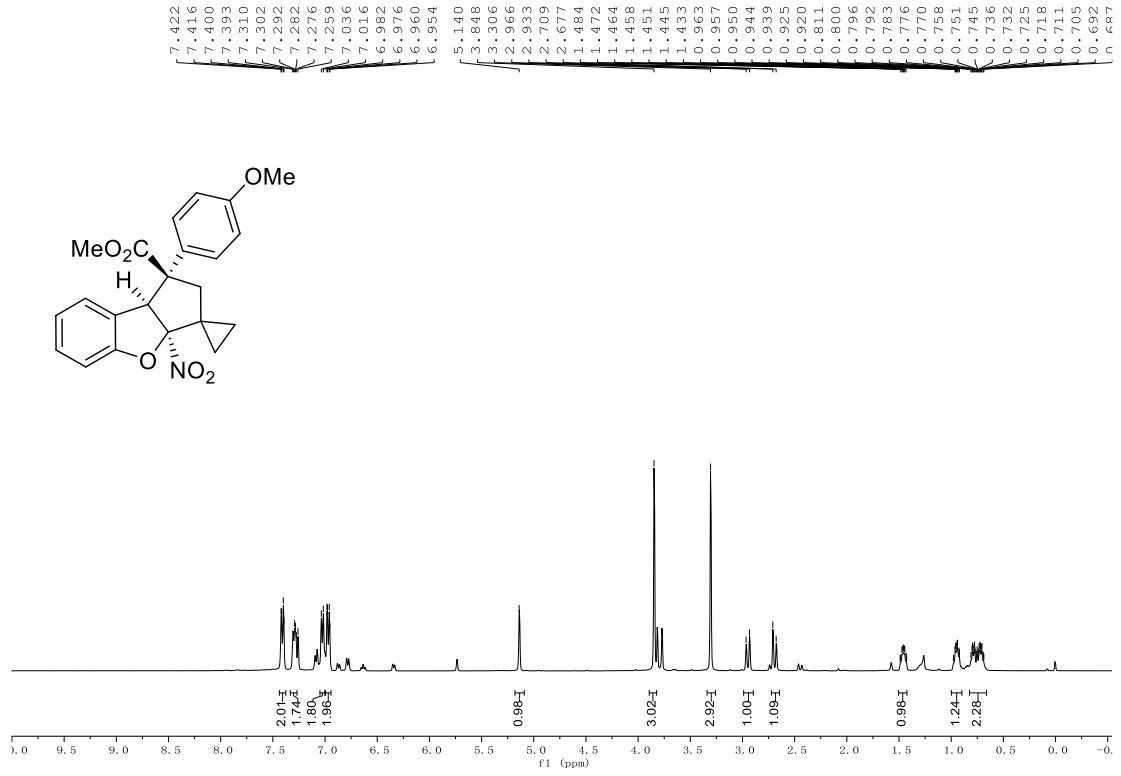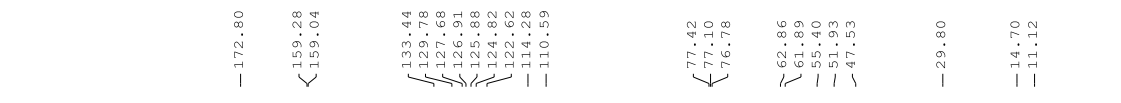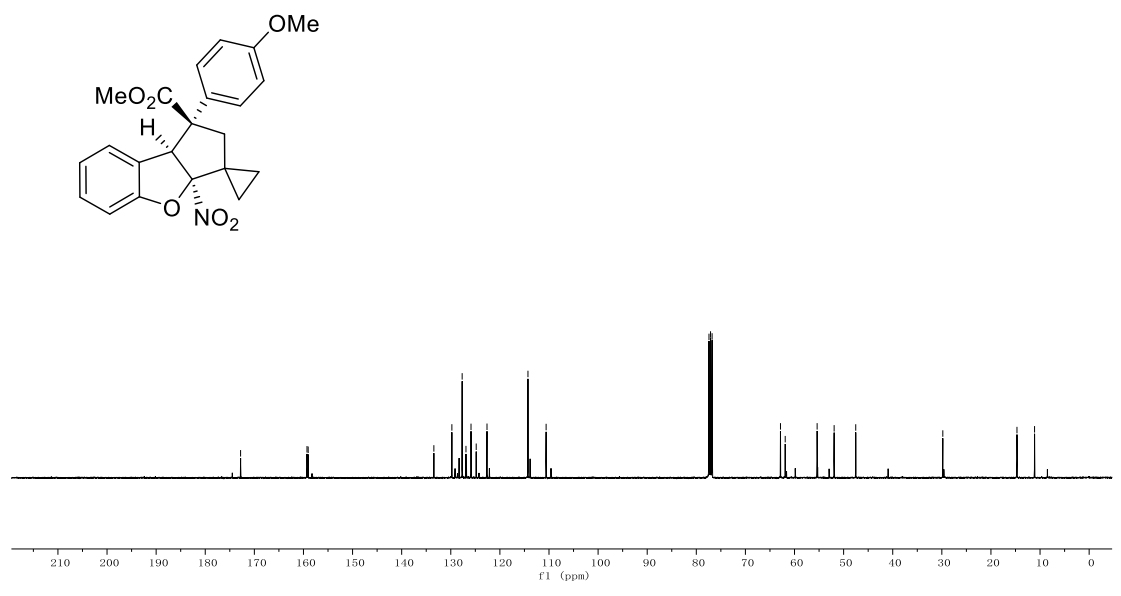

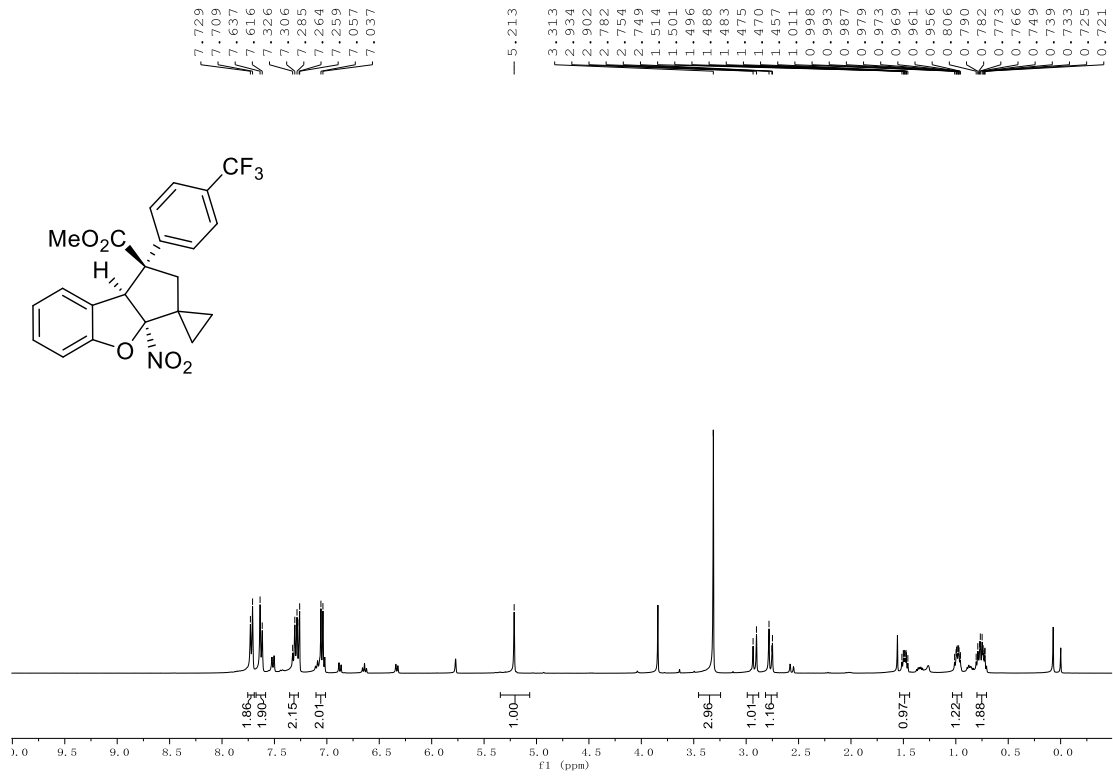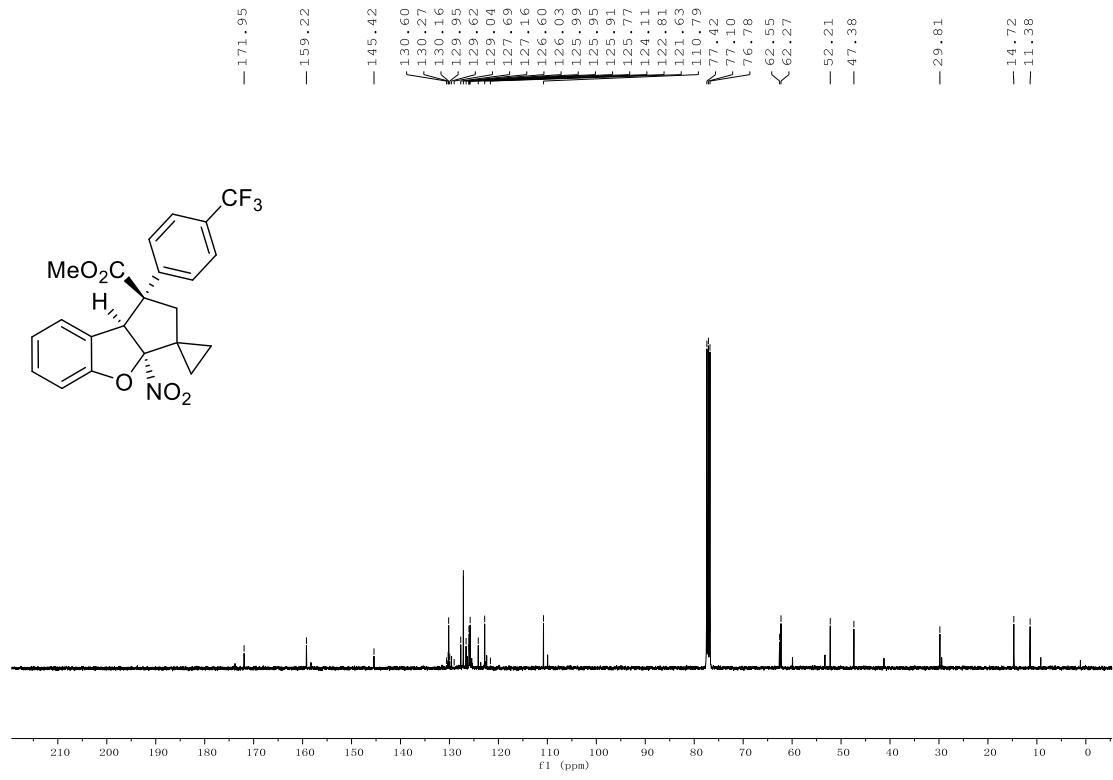



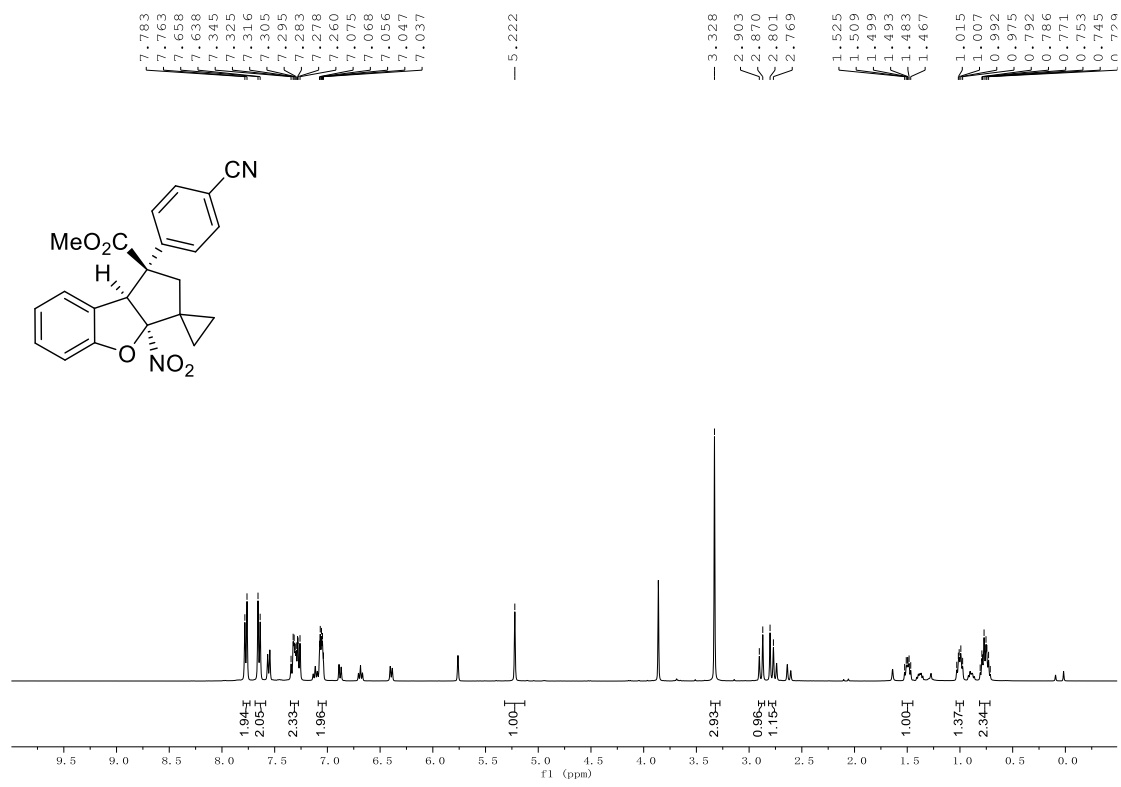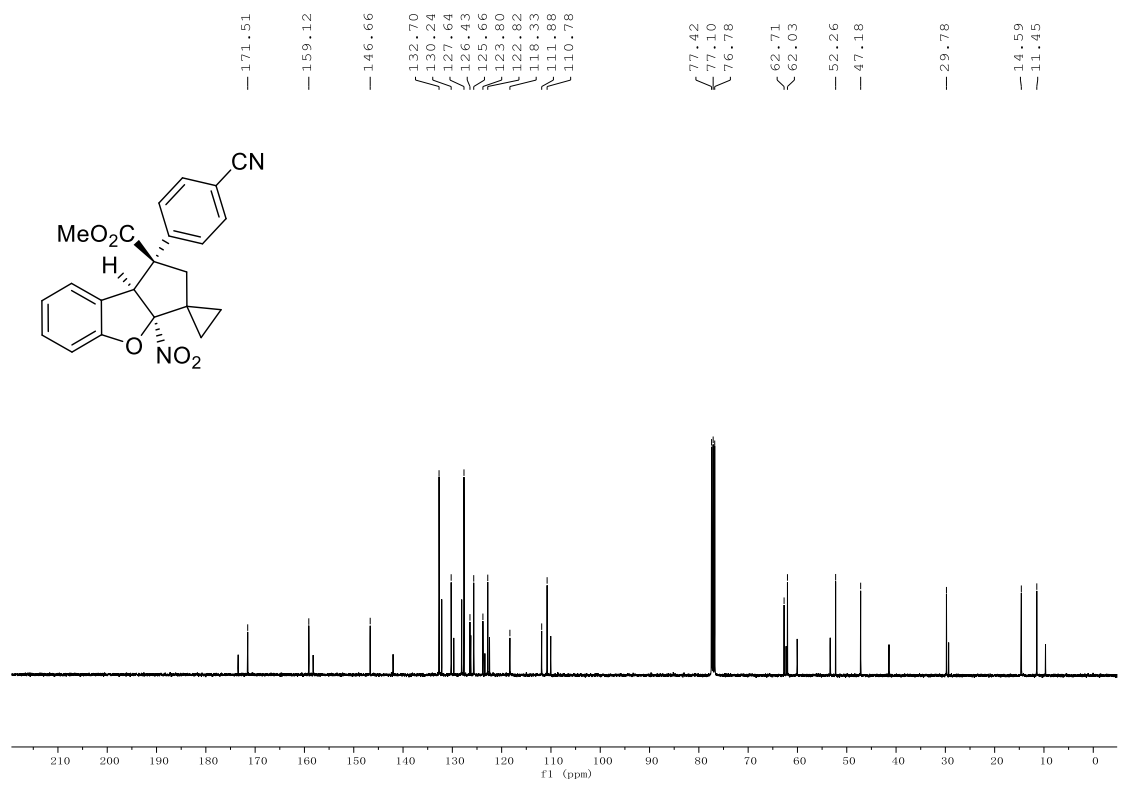

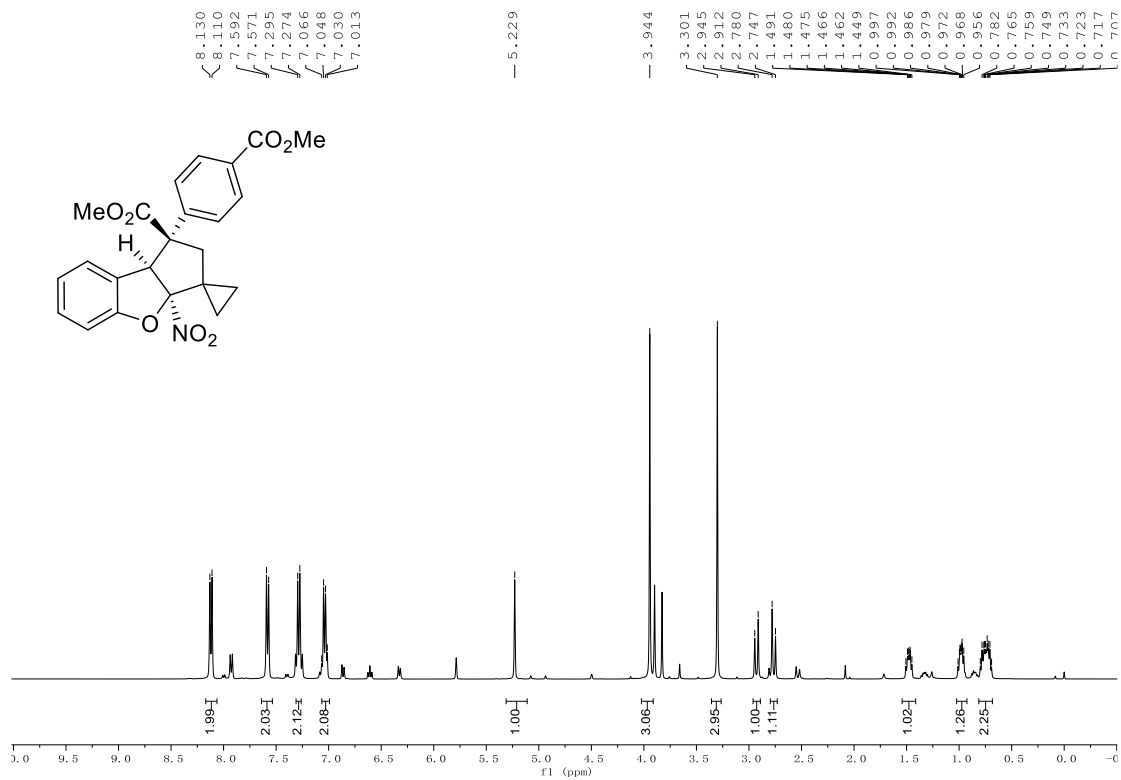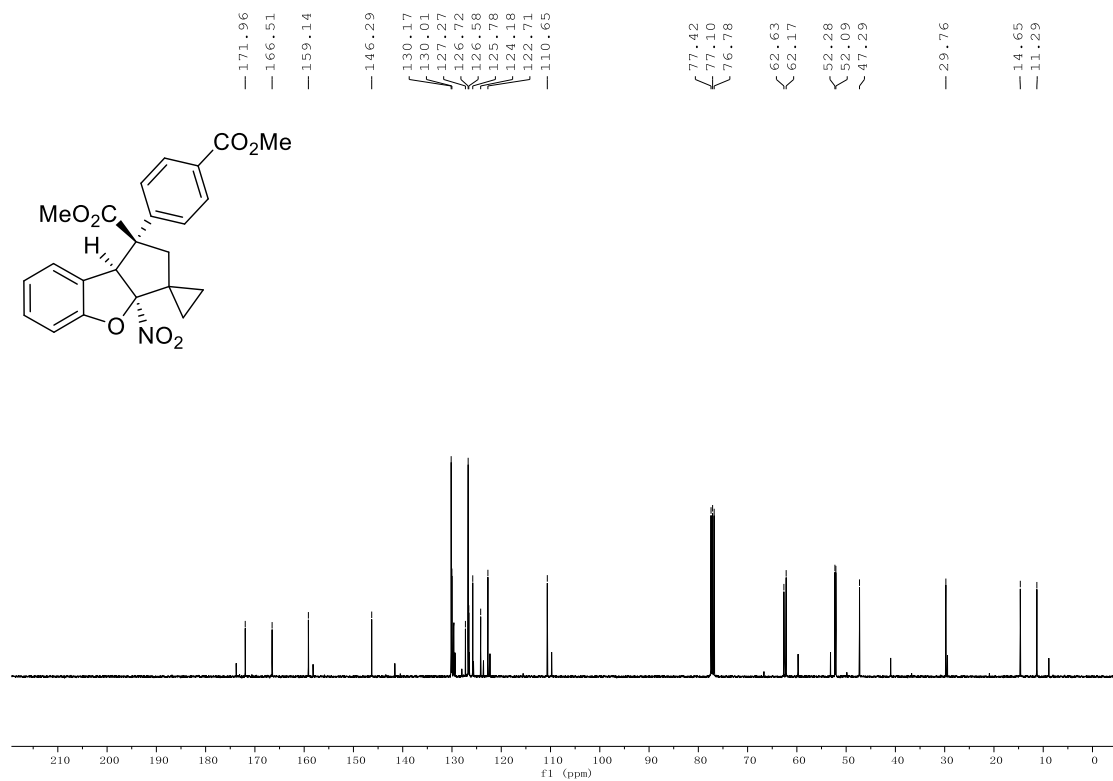

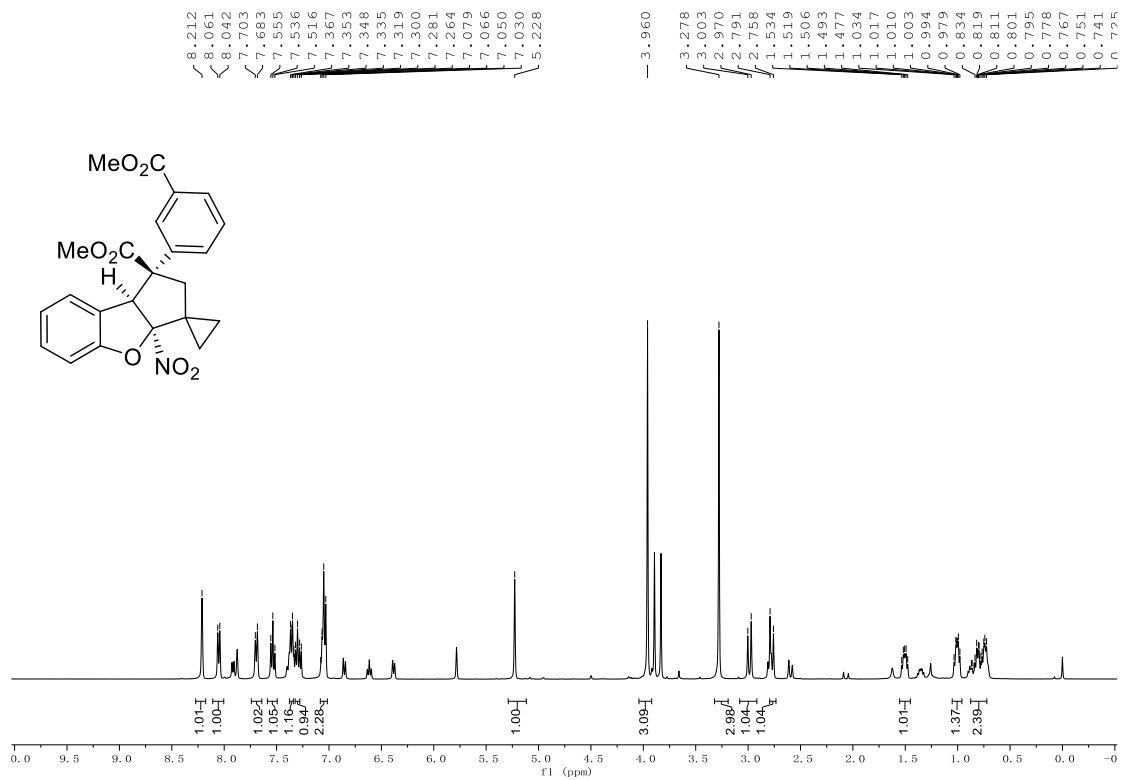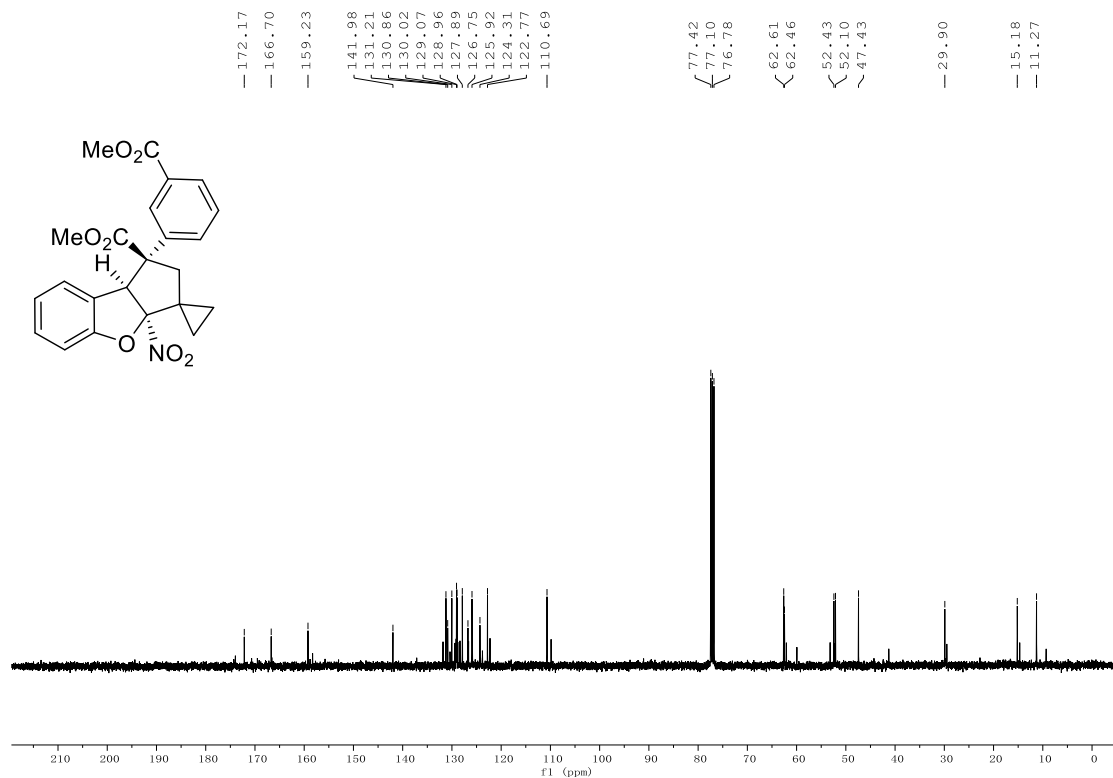

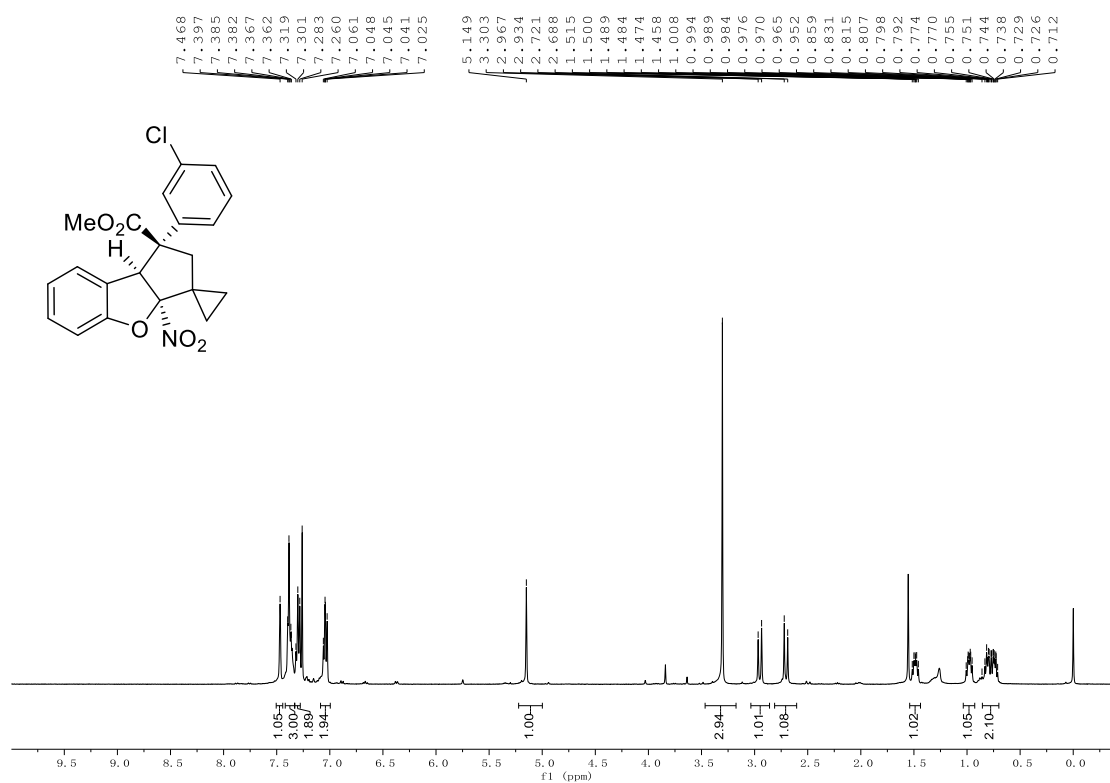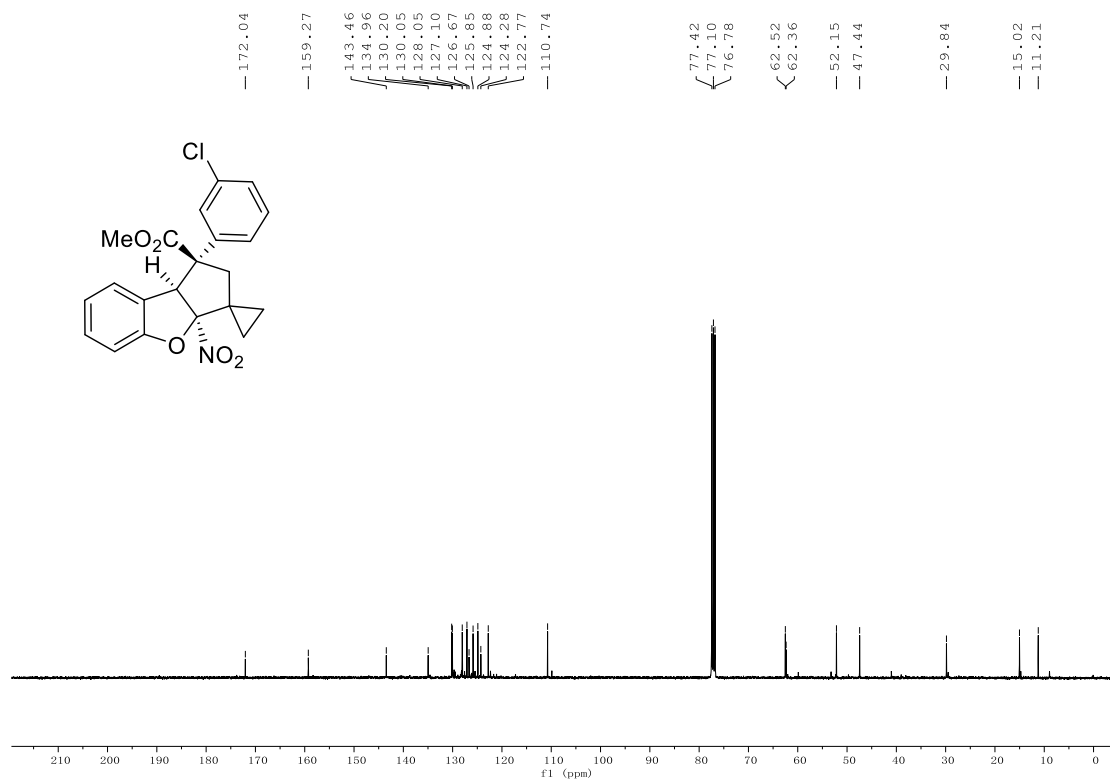

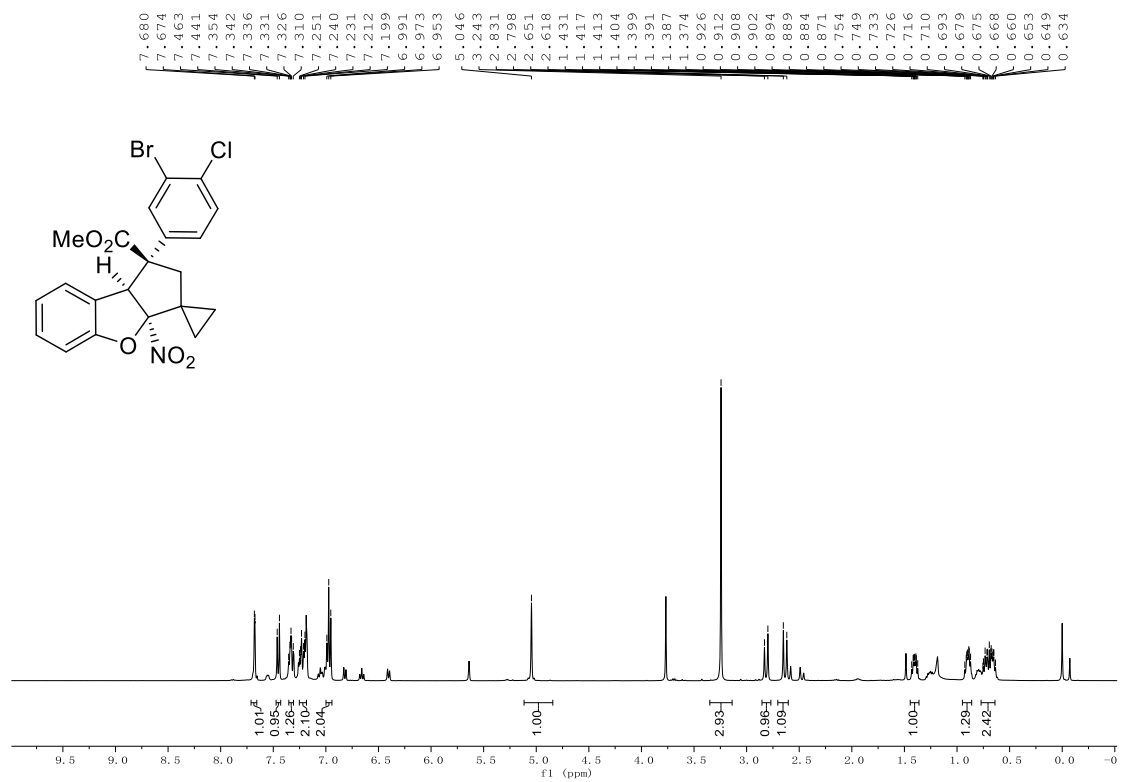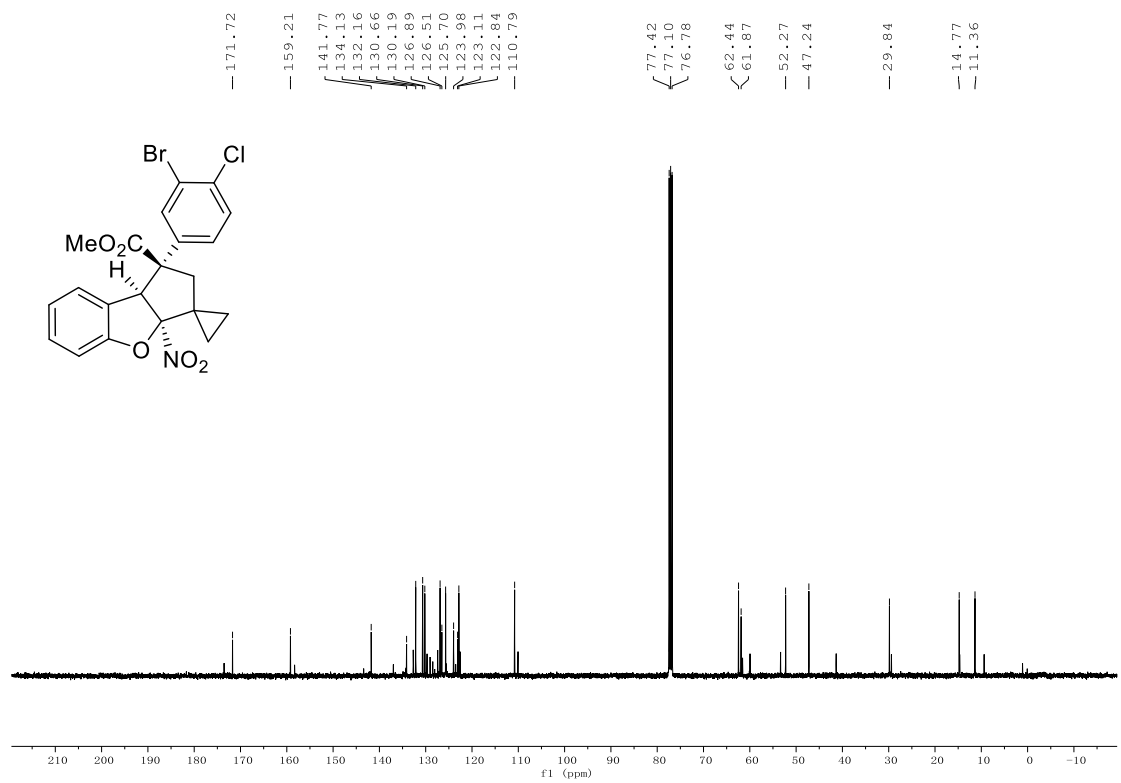

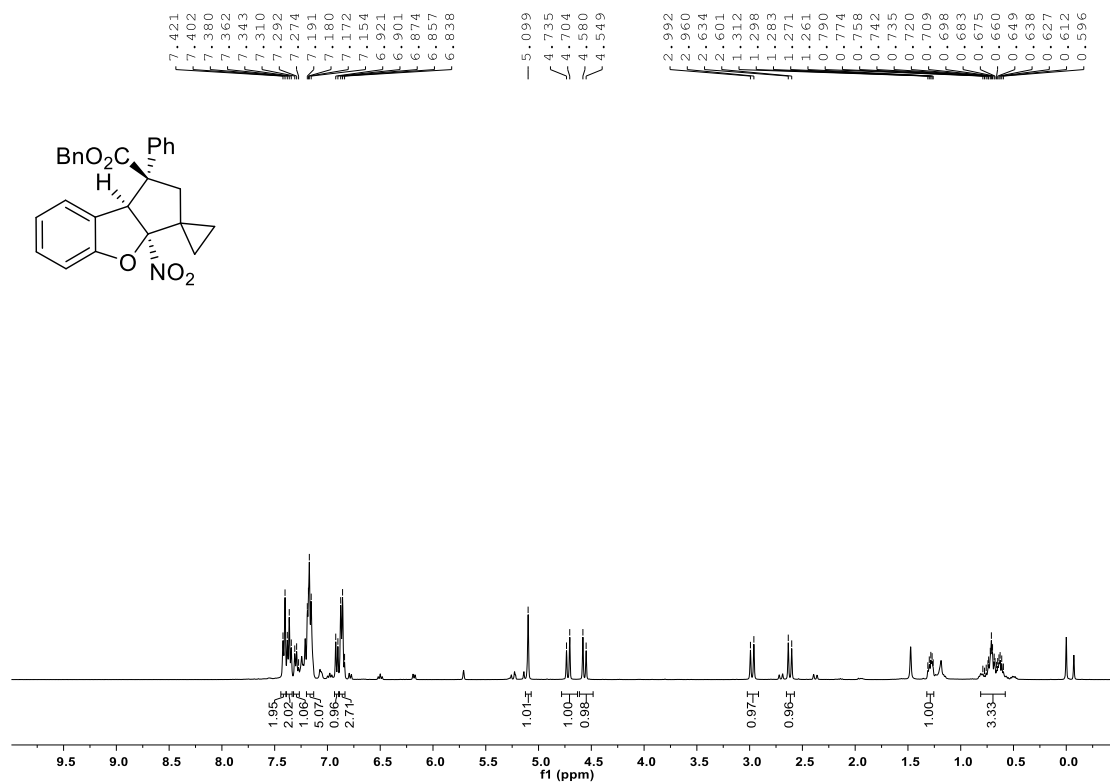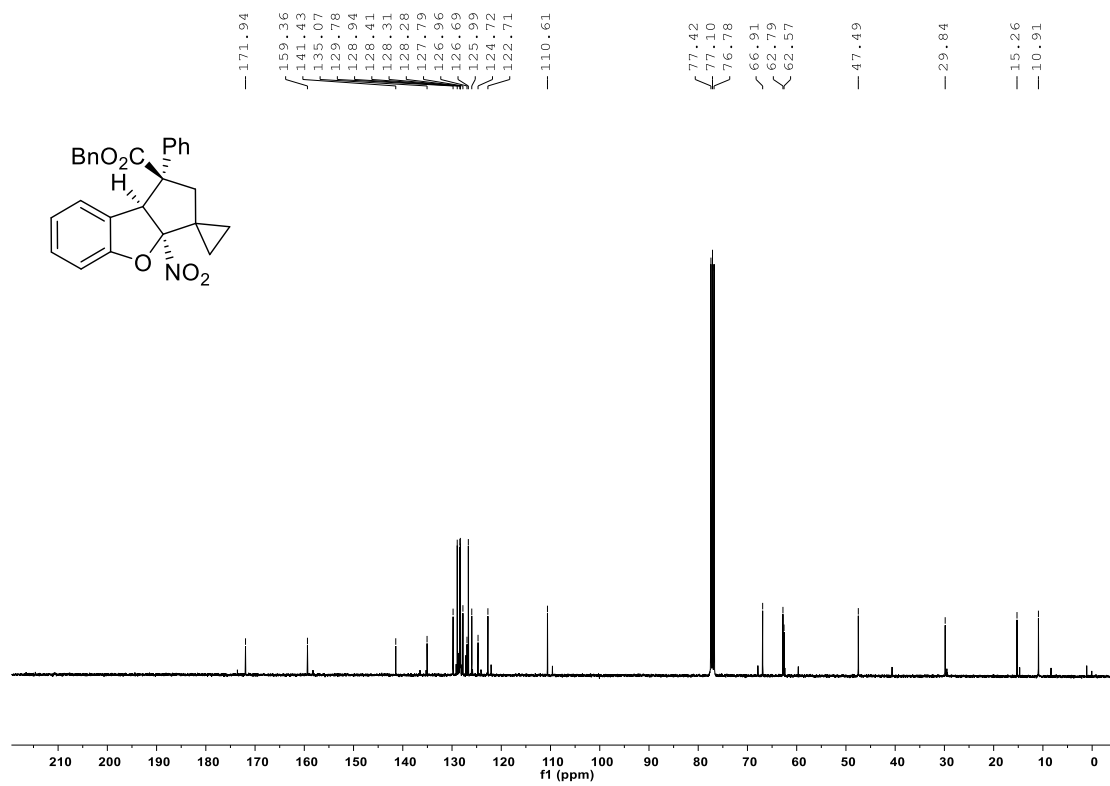

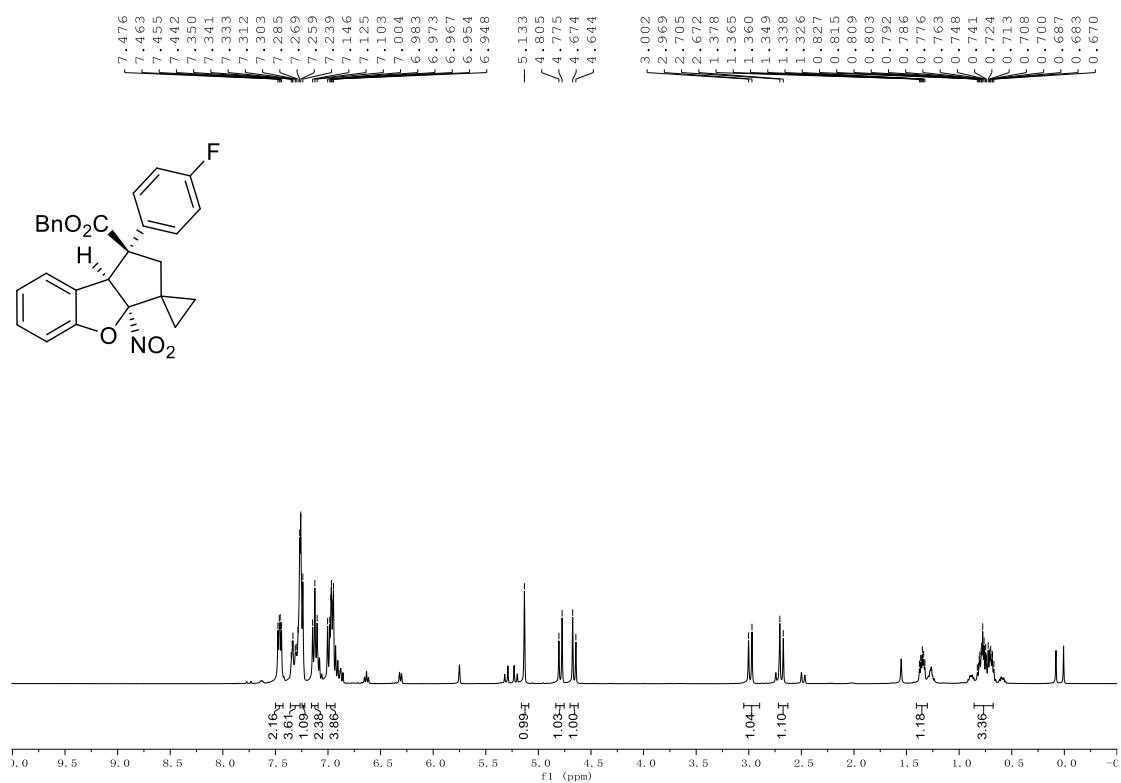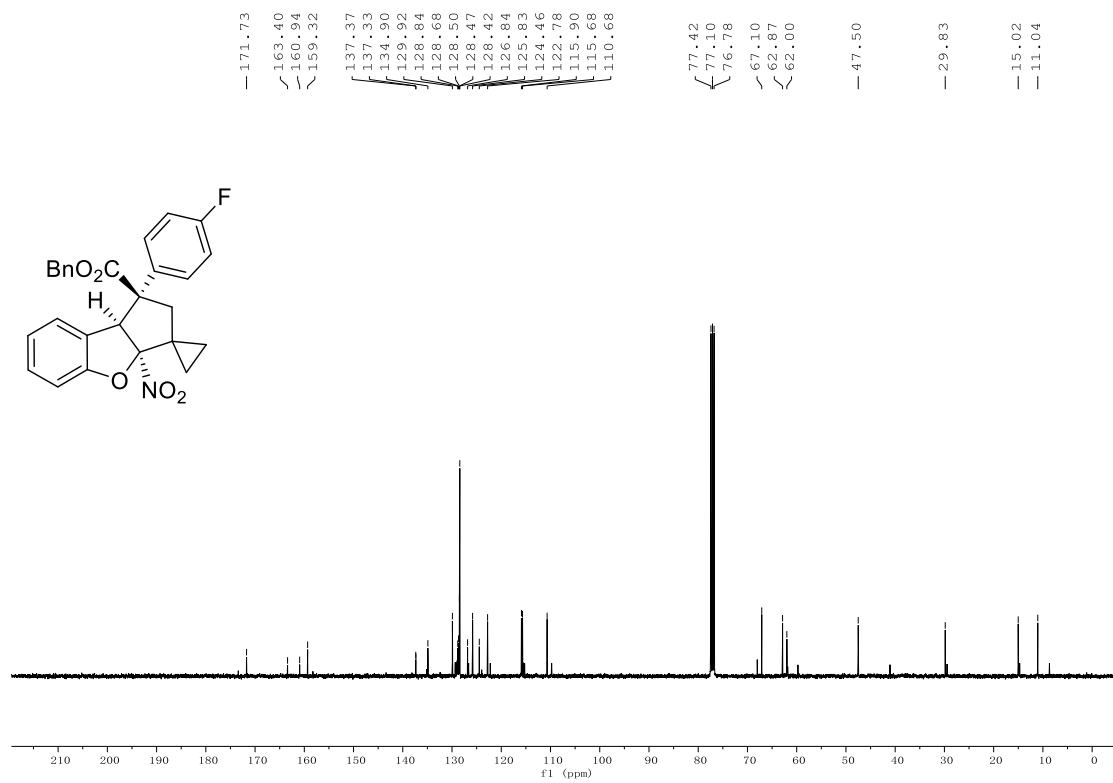

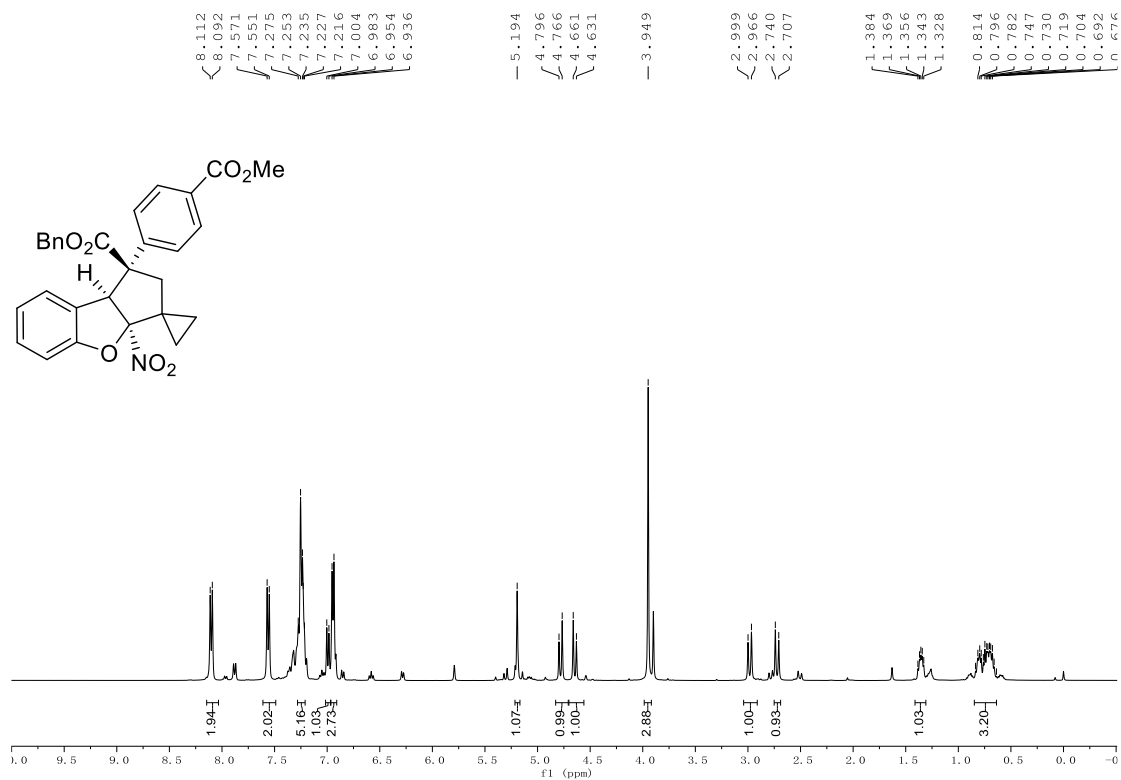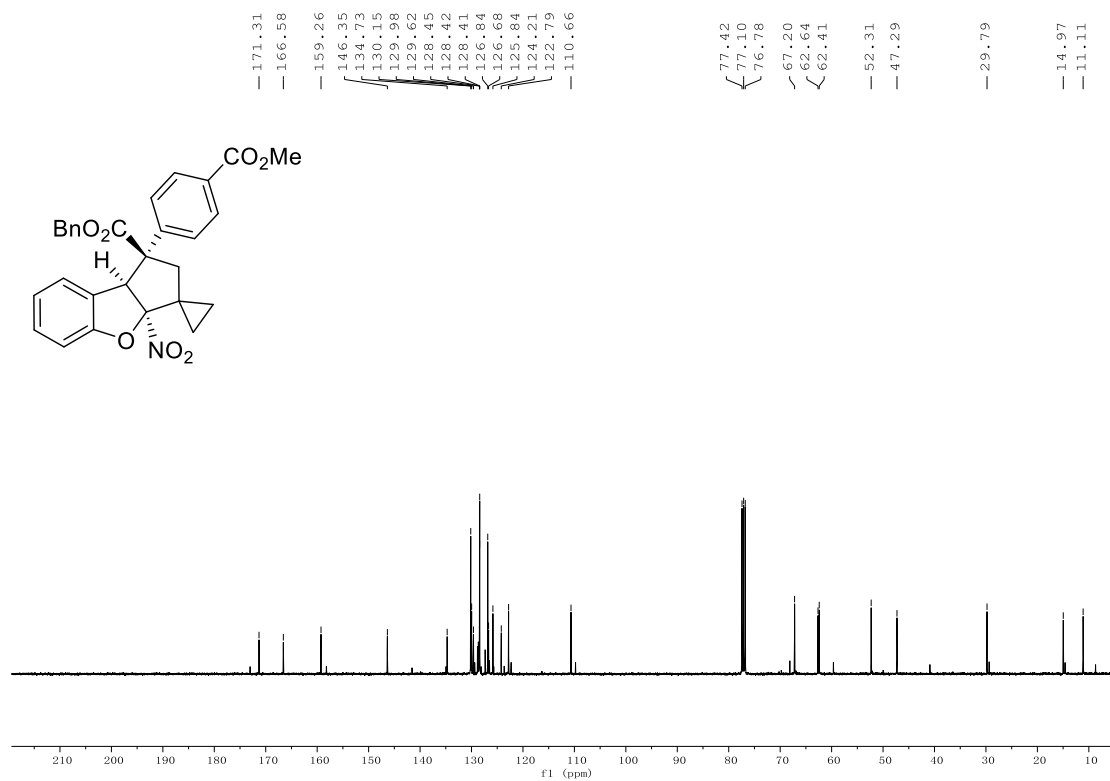



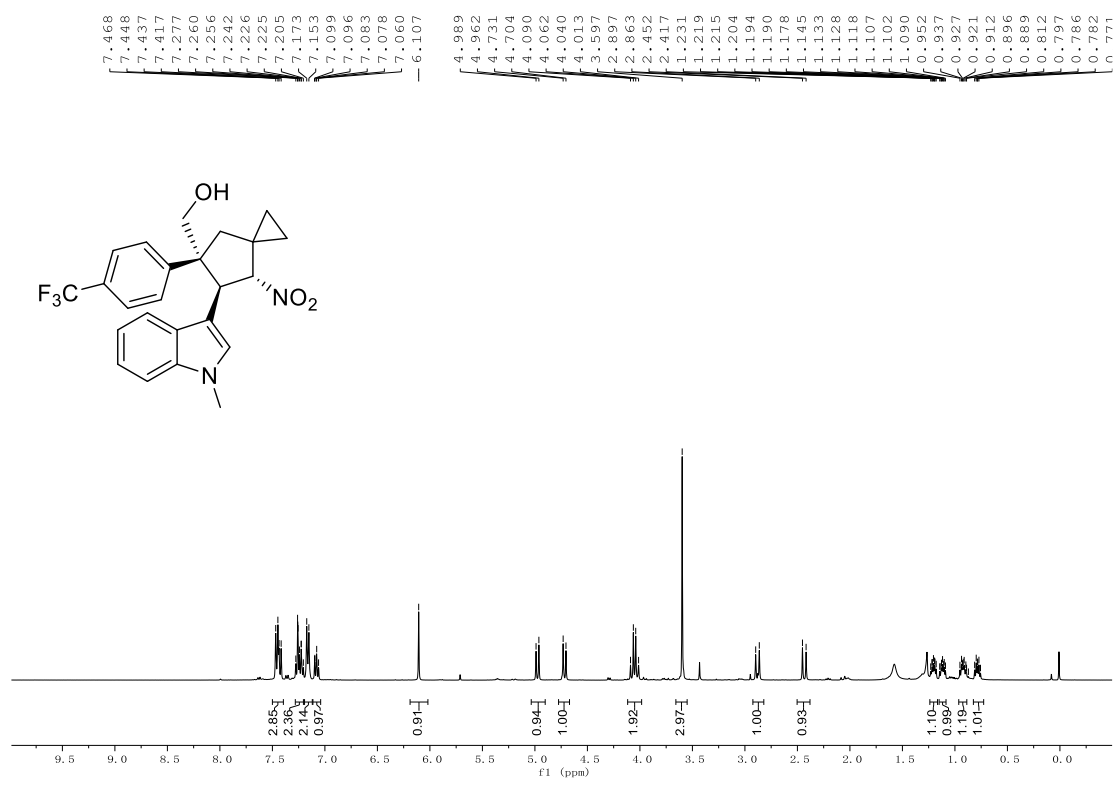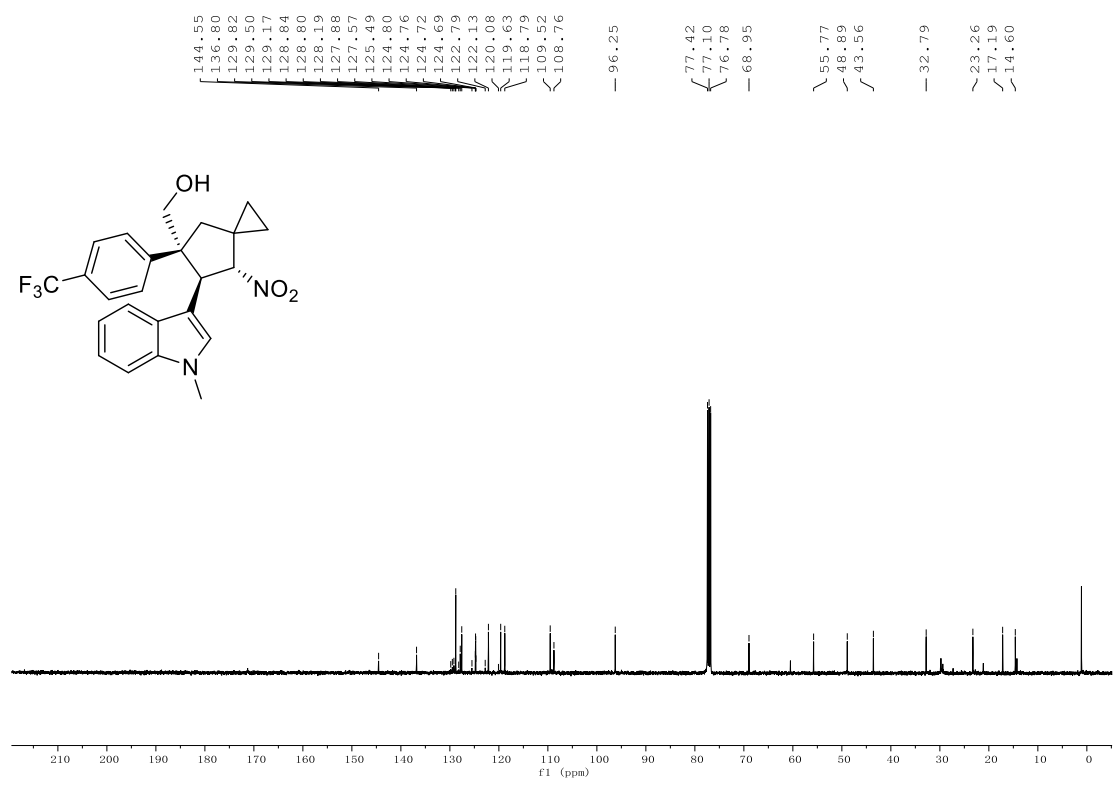

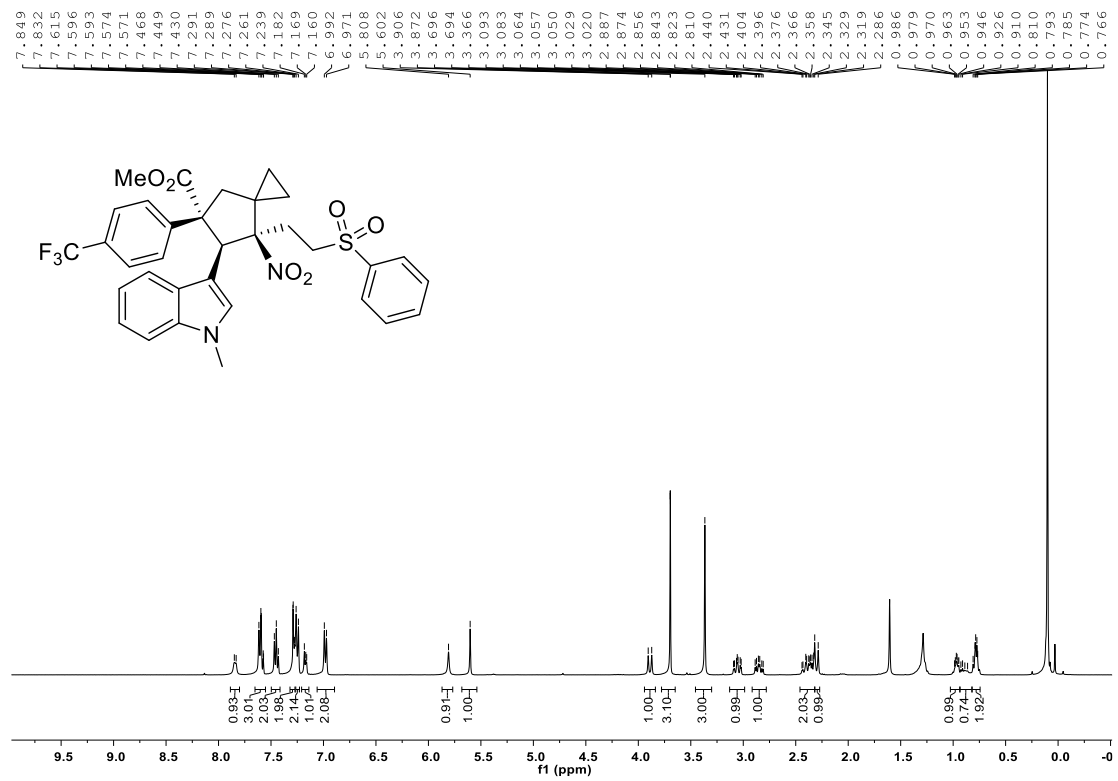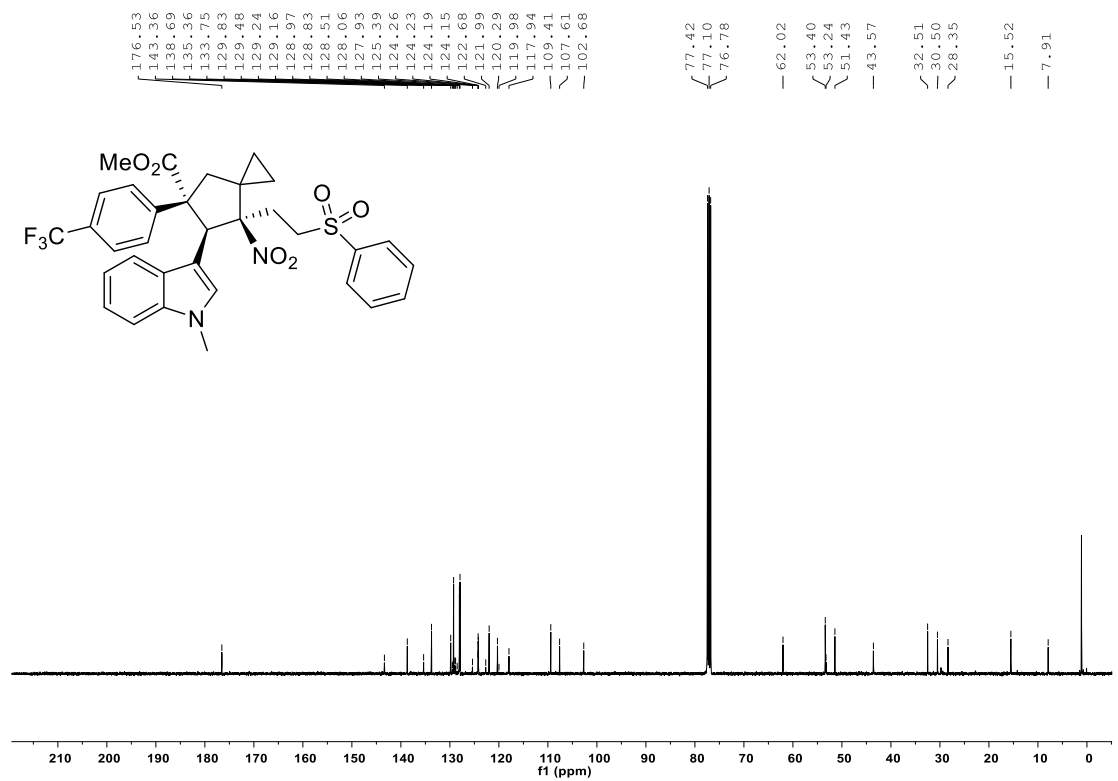

## 9.HPLC Spectra

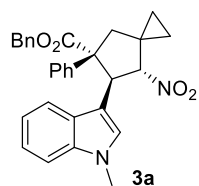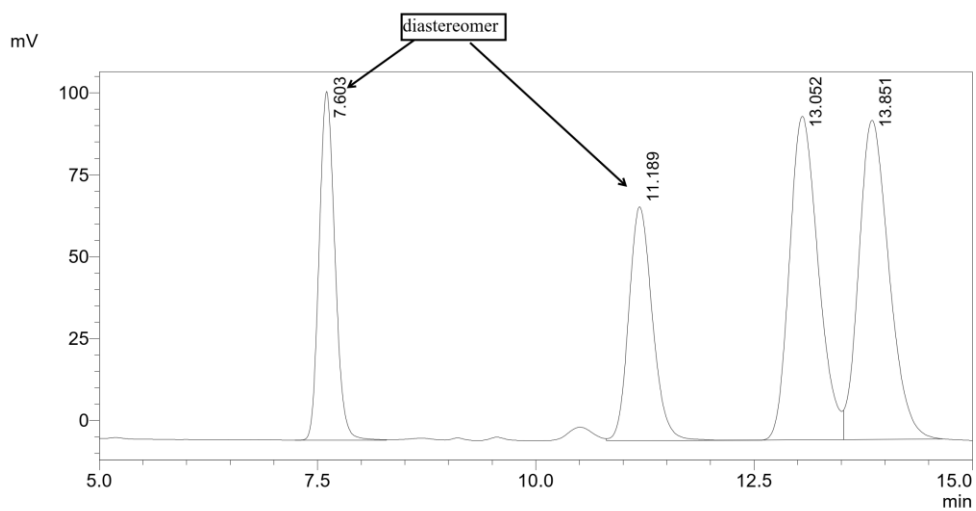

| Peak# | Ret. Time | Area    | Height | Area%   |
|-------|-----------|---------|--------|---------|
| 1     | 7.603     | 1333671 | 106443 | 18.278  |
| 2     | 11.189    | 1345295 | 71341  | 18.437  |
| 3     | 13.052    | 2273663 | 98785  | 31.161  |
| 4     | 13.851    | 2343985 | 97428  | 32.124  |
|       |           | 7296614 | 373997 | 100.000 |

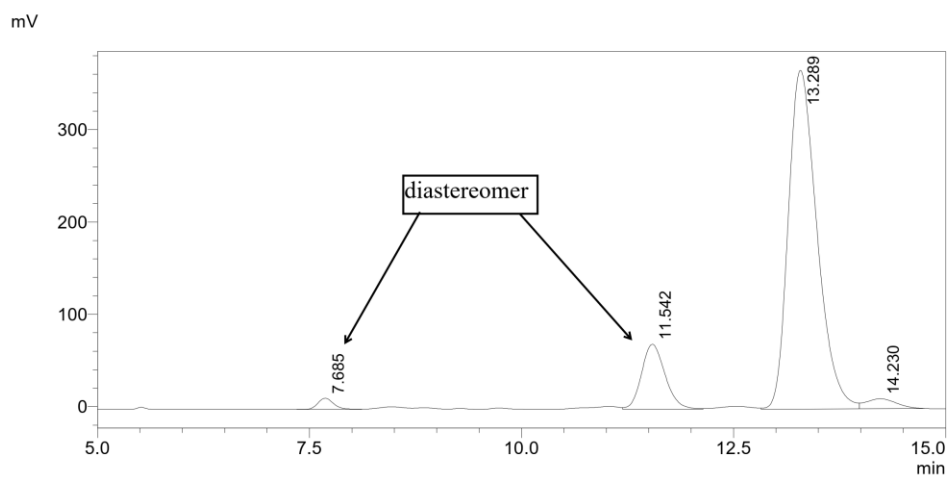

| Peak# | Ret. Time | Area     | Height | Area%   |
|-------|-----------|----------|--------|---------|
| 1     | 7.685     | 157581   | 12030  | 1.508   |
| 2     | 11.542    | 1364925  | 70467  | 13.064  |
| 3     | 13.289    | 8657418  | 366935 | 82.859  |
| 4     | 14.230    | 268455   | 10773  | 2.569   |
|       |           | 10448379 | 460205 | 100.000 |

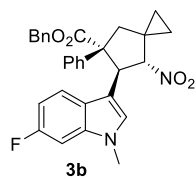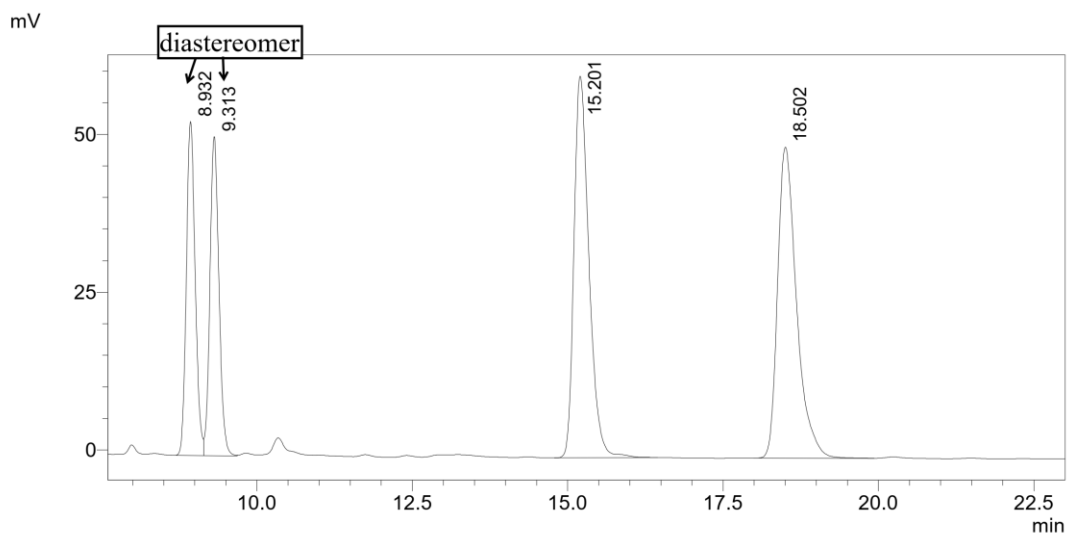

| Peak# | Ret. Time | Area    | Height | Area%   |
|-------|-----------|---------|--------|---------|
| 1     | 8.932     | 523484  | 52914  | 16.937  |
| 2     | 9.313     | 509840  | 50525  | 16.496  |
| 3     | 15.201    | 1012068 | 60461  | 32.745  |
| 4     | 18.502    | 1045330 | 49263  | 33.822  |
|       |           | 3090721 | 213163 | 100.000 |

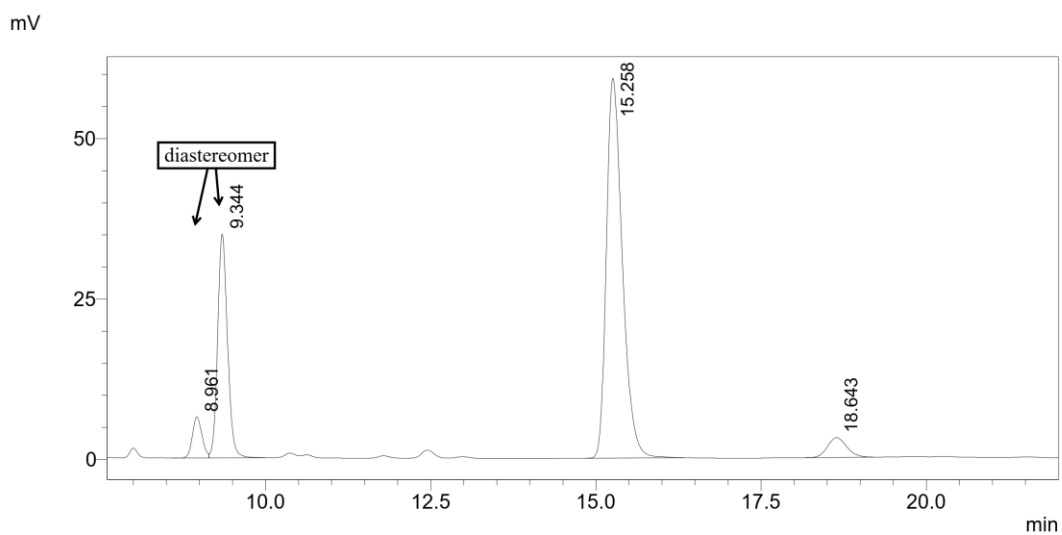

| Peak# | Ret. Time | Area    | Height | Area%   |
|-------|-----------|---------|--------|---------|
| 1     | 8.961     | 65063   | 6402   | 4.375   |
| 2     | 9.344     | 363567  | 34848  | 24.450  |
| 3     | 15.258    | 996213  | 59202  | 66.995  |
| 4     | 18.643    | 62162   | 3085   | 4.180   |
|       |           | 1487005 | 103537 | 100.000 |

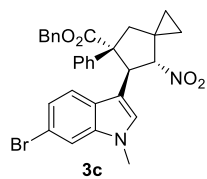

mV

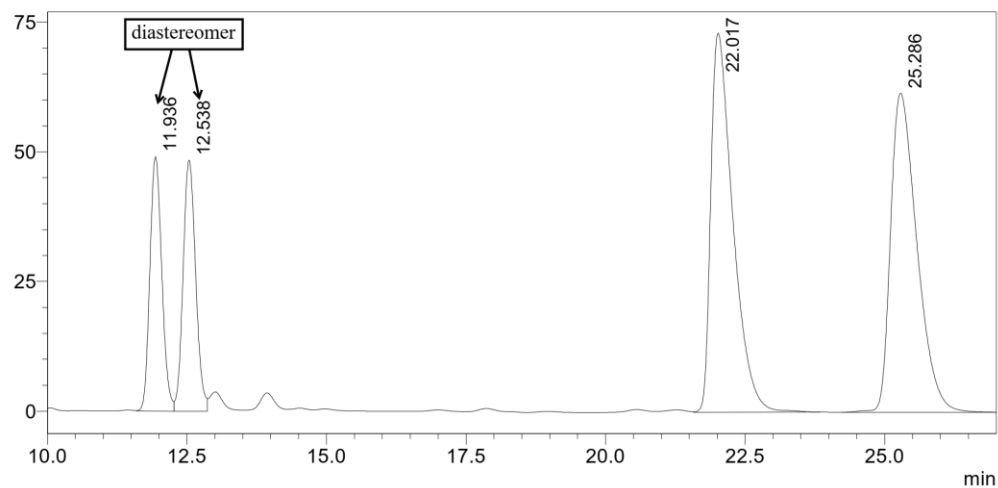

| Peak# | Ret. Time | Area    | Height | Area%   |
|-------|-----------|---------|--------|---------|
| 1     | 11.936    | 730478  | 48999  | 13.214  |
| 2     | 12.538    | 757742  | 48315  | 13.708  |
| 3     | 22.017    | 2015299 | 73089  | 36.457  |
| 4     | 25.286    | 2024407 | 61511  | 36.621  |
|       |           | 5527925 | 231914 | 100.000 |

mV

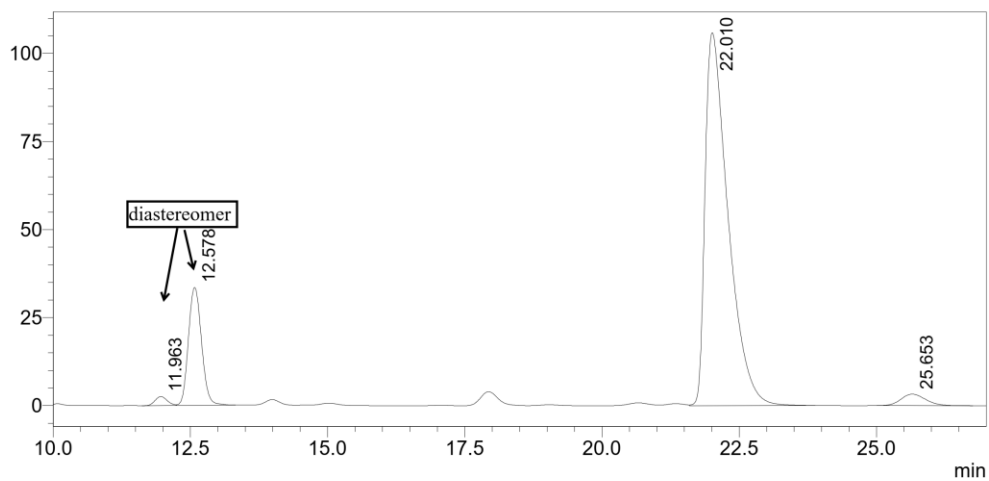

| Peak# | Ret. Time | Area    | Height | Area%   |
|-------|-----------|---------|--------|---------|
| 1     | 11.963    | 39663   | 2549   | 1.049   |
| 2     | 12.578    | 557074  | 33493  | 14.739  |
| 3     | 22.010    | 3080883 | 105919 | 81.512  |
| 4     | 25.653    | 102058  | 3269   | 2.700   |
|       |           | 3779678 | 145230 | 100.000 |

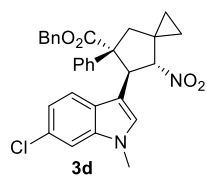

mV

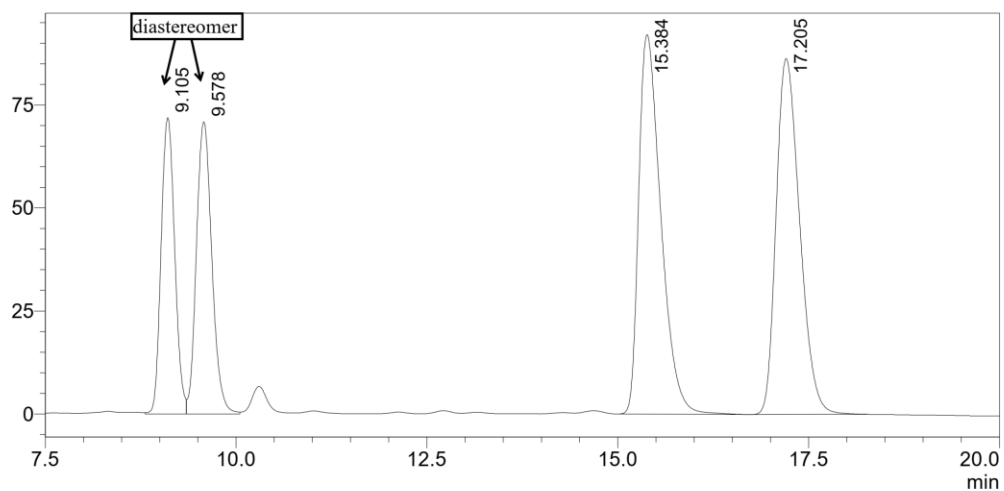

| Peak# | Ret. Time | Area    | Height | Area%   |
|-------|-----------|---------|--------|---------|
| 1     | 9.105     | 893168  | 71928  | 15.917  |
| 2     | 9.578     | 1000494 | 70917  | 17.830  |
| 3     | 15.384    | 1861671 | 92153  | 33.177  |
| 4     | 17.205    | 1856030 | 86391  | 33.076  |
|       |           | 5611362 | 321389 | 100.000 |

mV

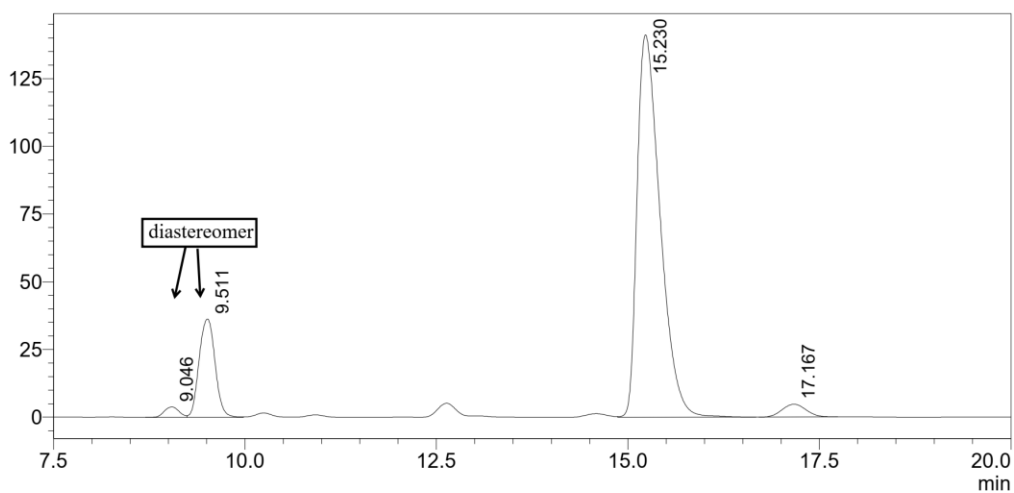

| Peak# | Ret. Time | Area    | Height | Area%   |
|-------|-----------|---------|--------|---------|
| 1     | 9.046     | 51754   | 3825   | 1.424   |
| 2     | 9.511     | 527751  | 36305  | 14.522  |
| 3     | 15.230    | 2951954 | 141155 | 81.229  |
| 4     | 17.167    | 102634  | 4712   | 2.824   |
|       |           | 3634092 | 185997 | 100.000 |

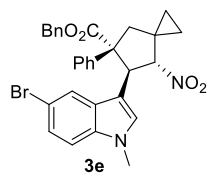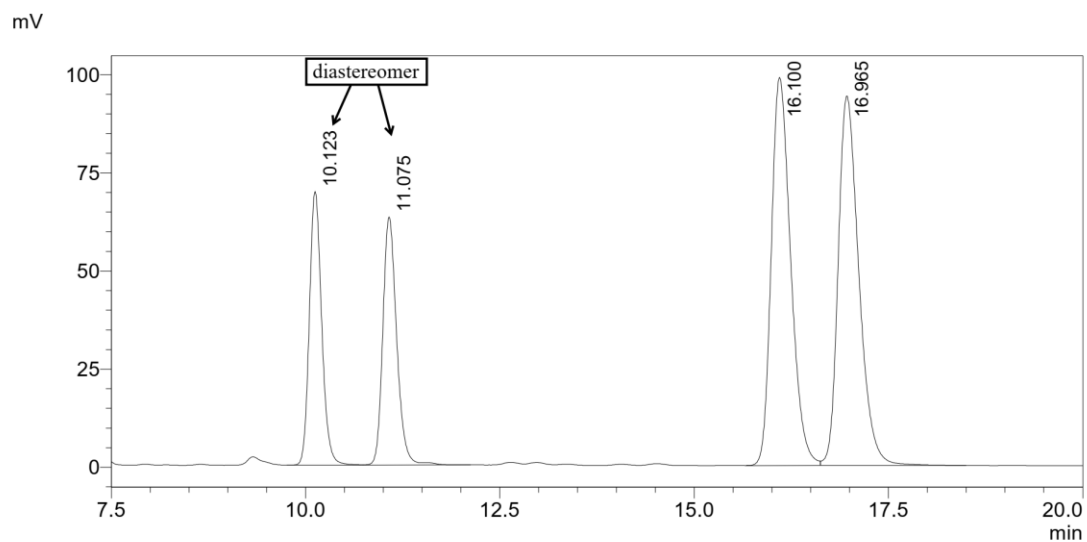

| Peak# | Ret. Time | Area    | Height | Area%   |
|-------|-----------|---------|--------|---------|
| 1     | 10.123    | 767874  | 69664  | 15.337  |
| 2     | 11.075    | 782685  | 63213  | 15.633  |
| 3     | 16.100    | 1715021 | 98850  | 34.254  |
| 4     | 16.965    | 1741186 | 94105  | 34.777  |
|       |           | 5006767 | 325832 | 100.000 |

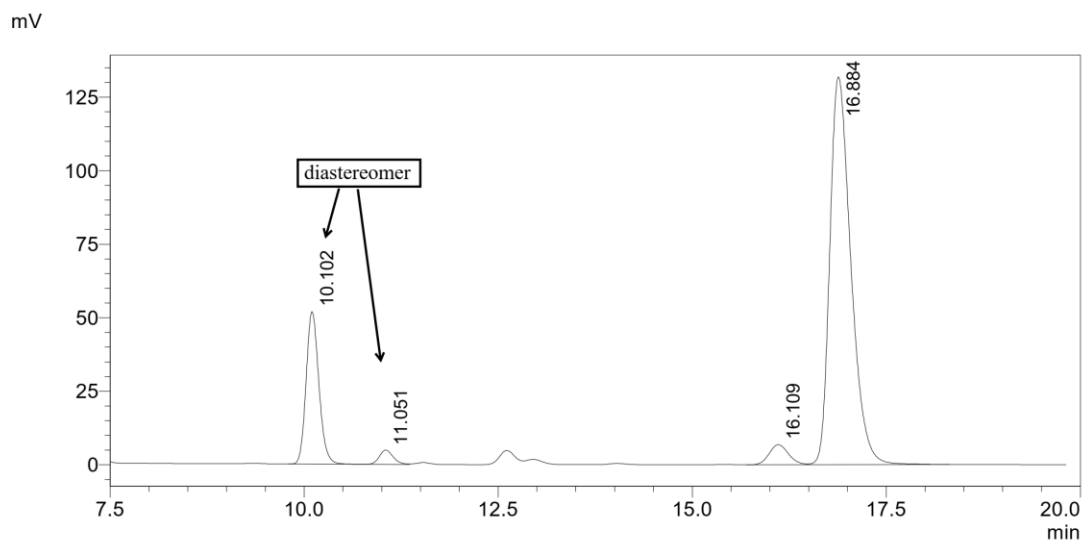

| Peak# | Ret. Time | Area    | Height | Area%   |
|-------|-----------|---------|--------|---------|
| 1     | 10.102    | 593561  | 51856  | 18.200  |
| 2     | 11.051    | 59850   | 4819   | 1.835   |
| 3     | 16.109    | 118772  | 6837   | 3.642   |
| 4     | 16.884    | 2489195 | 131897 | 76.323  |
|       |           | 3261377 | 195408 | 100.000 |

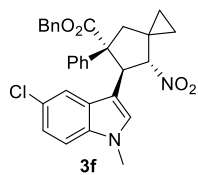

mV

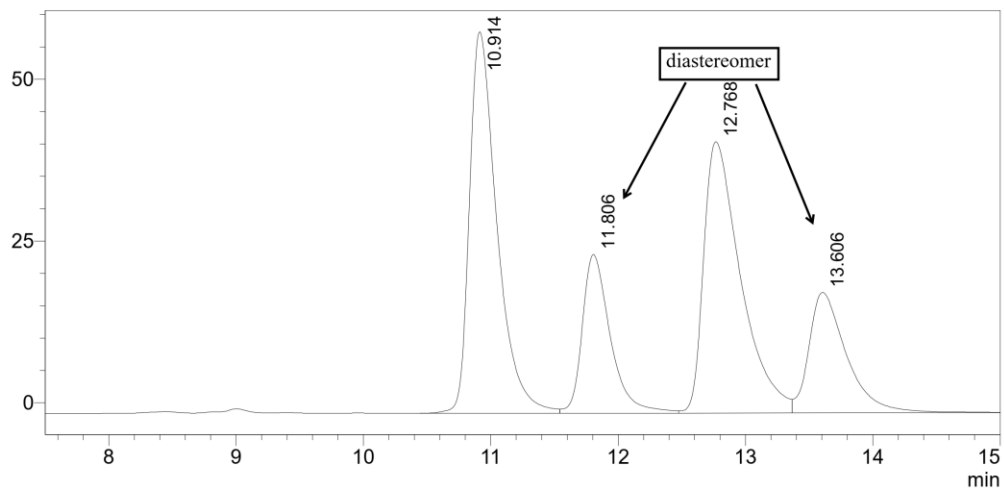

| Peak# | Ret. Time | Area    | Height | Area%   |
|-------|-----------|---------|--------|---------|
| 1     | 10.914    | 886511  | 58963  | 35.488  |
| 2     | 11.806    | 376496  | 24549  | 15.071  |
| 3     | 12.768    | 848653  | 41947  | 33.972  |
| 4     | 13.606    | 386426  | 18636  | 15.469  |
|       |           | 2498086 | 144095 | 100.000 |

mV

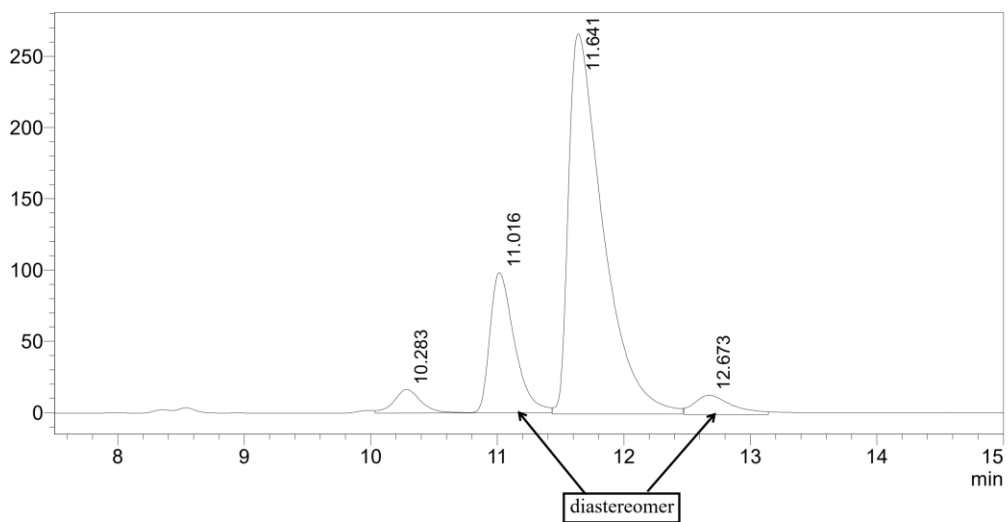

| Peak# | Ret. Time | Area    | Height | Area%   |
|-------|-----------|---------|--------|---------|
| 1     | 10.283    | 247795  | 16642  | 3.577   |
| 2     | 11.016    | 1330632 | 98521  | 19.209  |
| 3     | 11.641    | 5065326 | 266810 | 73.123  |
| 4     | 12.673    | 283356  | 13561  | 4.091   |
|       |           | 6927109 | 395534 | 100.000 |



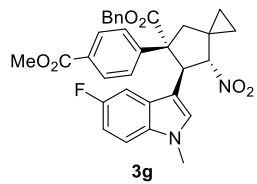

mV

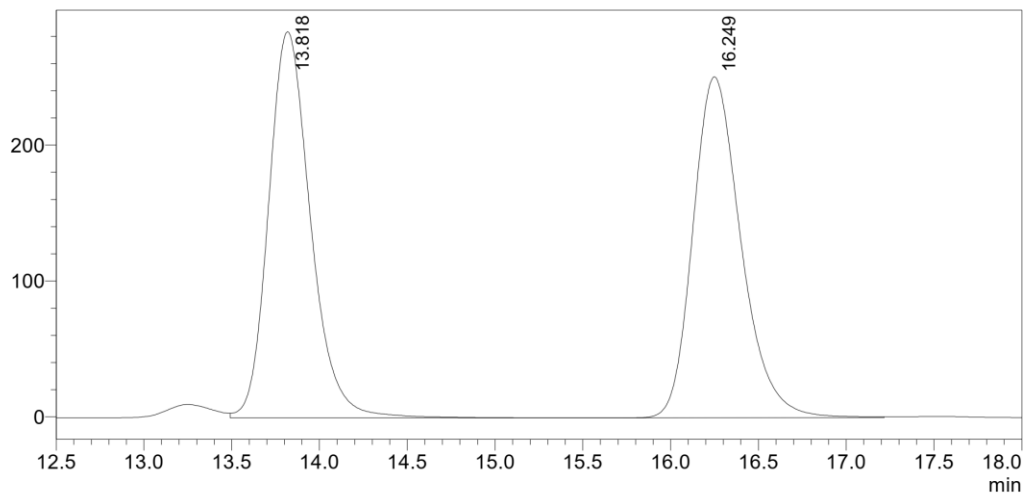

| Peak# | Ret. Time | Area    | Height | Area%   |
|-------|-----------|---------|--------|---------|
| 1     | 13.818    | 4734791 | 284319 | 49.736  |
| 2     | 16.249    | 4785144 | 251003 | 50.264  |
|       |           | 9519935 | 535323 | 100.000 |

mV

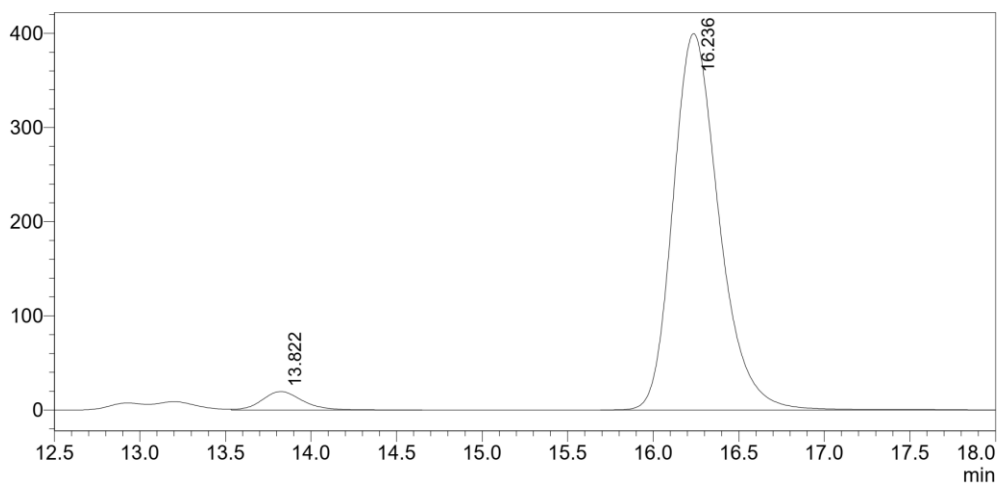

| Peak# | Ret. Time | Area    | Height | Area%   |
|-------|-----------|---------|--------|---------|
| 1     | 13.822    | 322945  | 19620  | 4.130   |
| 2     | 16.236    | 7496354 | 399769 | 95.870  |
|       |           | 7819298 | 419389 | 100.000 |

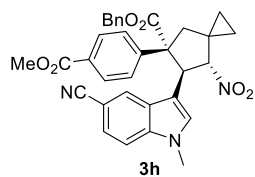

mV

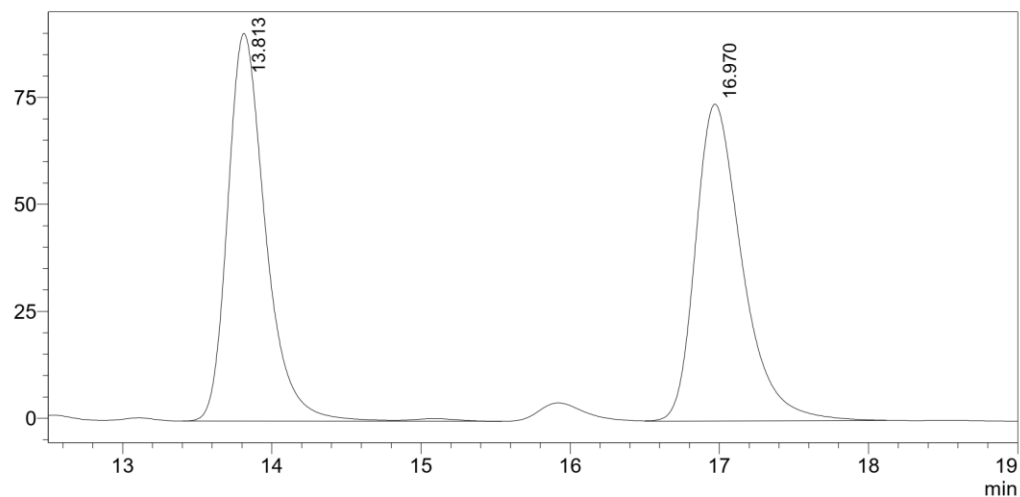

| Peak# | Ret. Time | Area    | Height | Area%   |
|-------|-----------|---------|--------|---------|
| 1     | 13.813    | 1608244 | 90616  | 49.940  |
| 2     | 16.970    | 1612092 | 74069  | 50.060  |
|       |           | 3220335 | 164685 | 100.000 |

mV

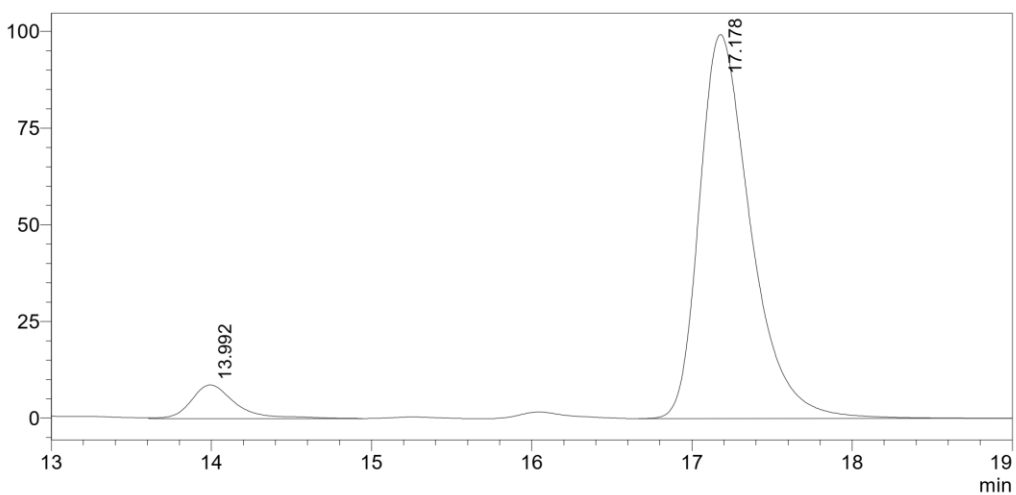

| Peak# | Ret. Time | Area    | Height | Area%   |
|-------|-----------|---------|--------|---------|
| 1     | 13.992    | 169587  | 8729   | 7.112   |
| 2     | 17.178    | 2215007 | 99310  | 92.888  |
|       |           | 2384594 | 108039 | 100.000 |

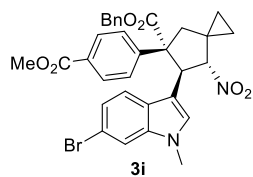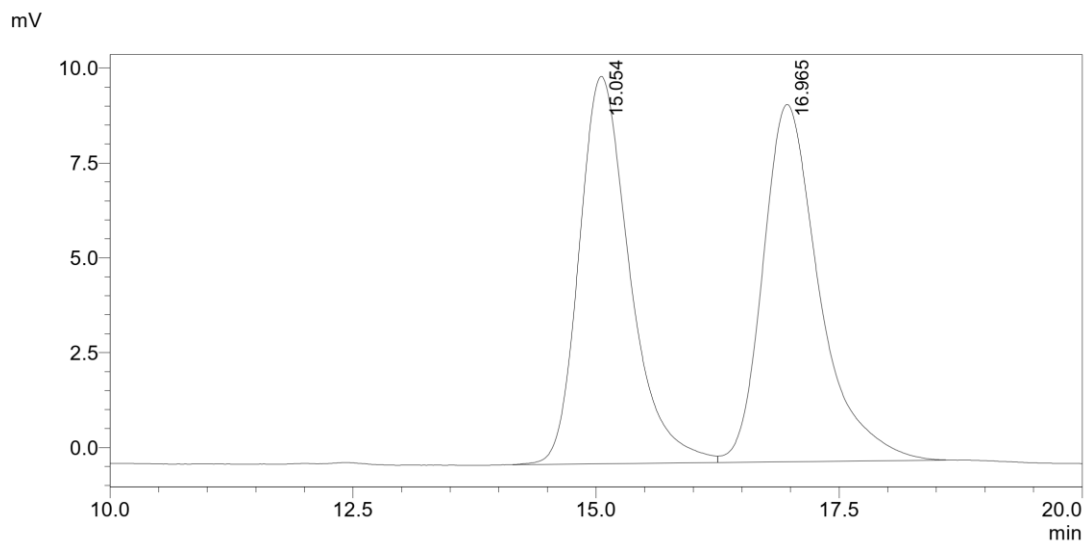

| Peak# | Ret. Time | Area   | Height | Area%   |
|-------|-----------|--------|--------|---------|
| 1     | 15.054    | 368952 | 10211  | 49.287  |
| 2     | 16.965    | 379626 | 9420   | 50.713  |
|       |           | 748577 | 19630  | 100.000 |

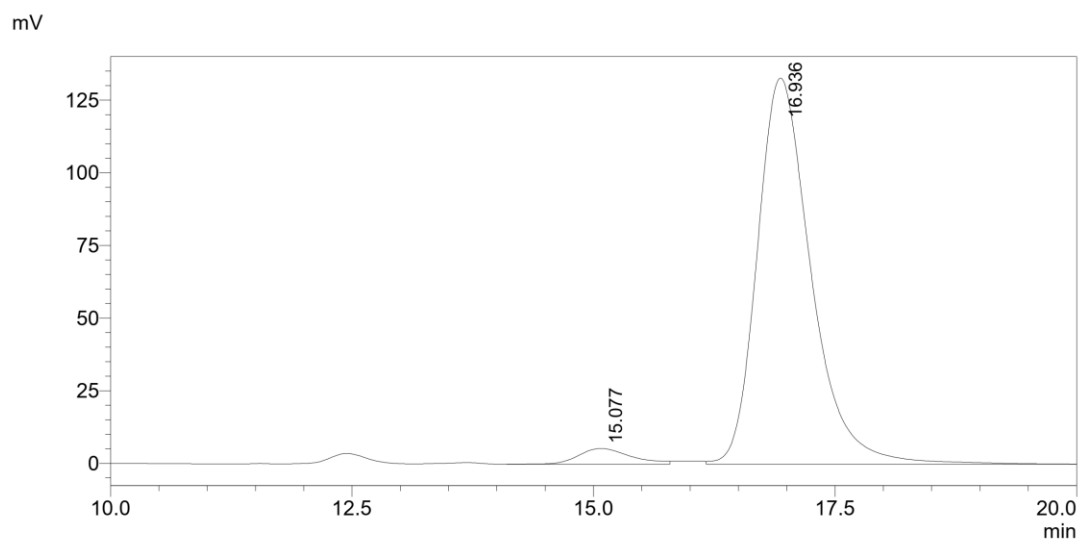

| Peak# | Ret. Time | Area    | Height | Area%   |
|-------|-----------|---------|--------|---------|
| 1     | 15.077    | 206099  | 5437   | 3.836   |
| 2     | 16.936    | 5166167 | 132853 | 96.164  |
|       |           | 5372266 | 138290 | 100.000 |

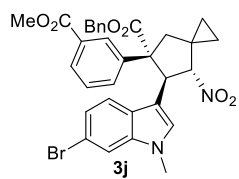

mV

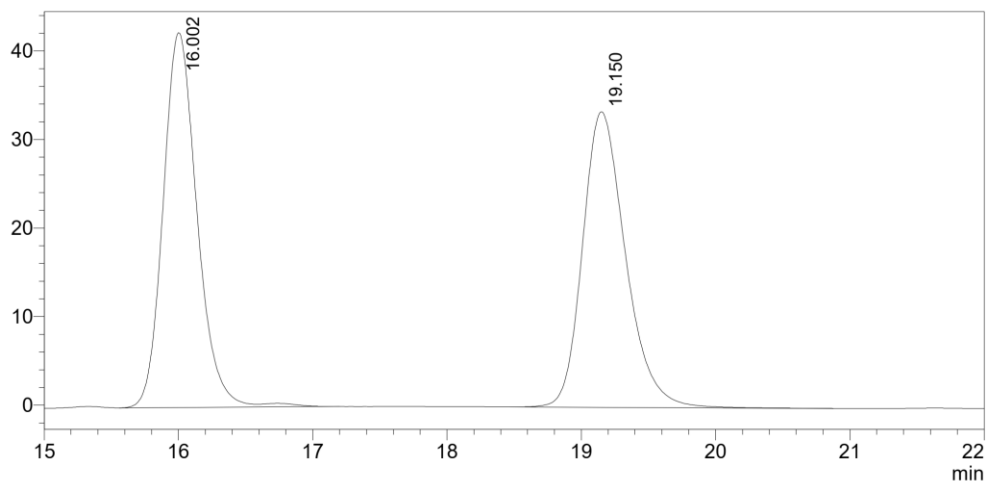

| Peak# | Ret. Time | Area    | Height | Area%   |
|-------|-----------|---------|--------|---------|
| 1     | 16.002    | 746503  | 42339  | 50.103  |
| 2     | 19.150    | 743436  | 33388  | 49.897  |
|       |           | 1489939 | 75727  | 100.000 |

mV

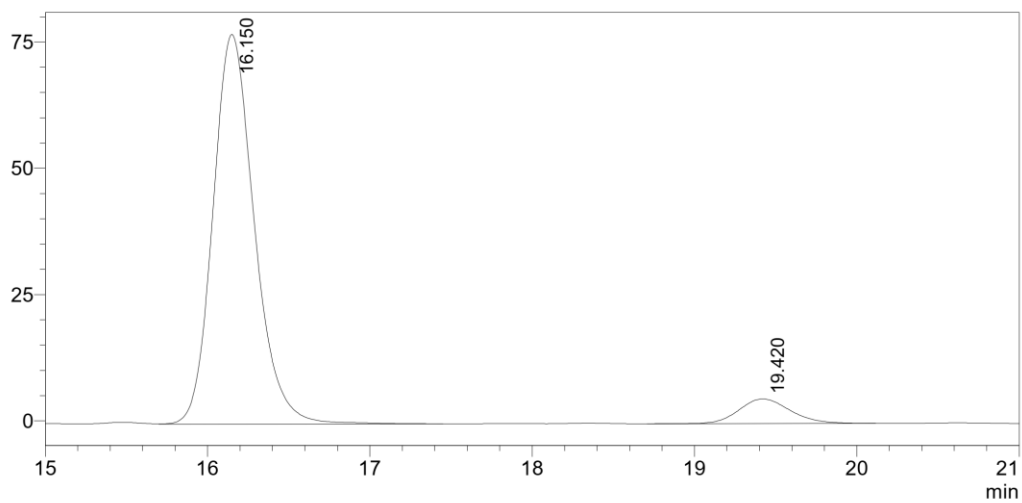

| Peak# | Ret. Time | Area    | Height | Area%   |
|-------|-----------|---------|--------|---------|
| 1     | 16.150    | 1364613 | 77162  | 92.652  |
| 2     | 19.420    | 108231  | 4891   | 7.348   |
|       |           | 1472844 | 82053  | 100.000 |

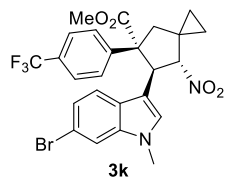

mV

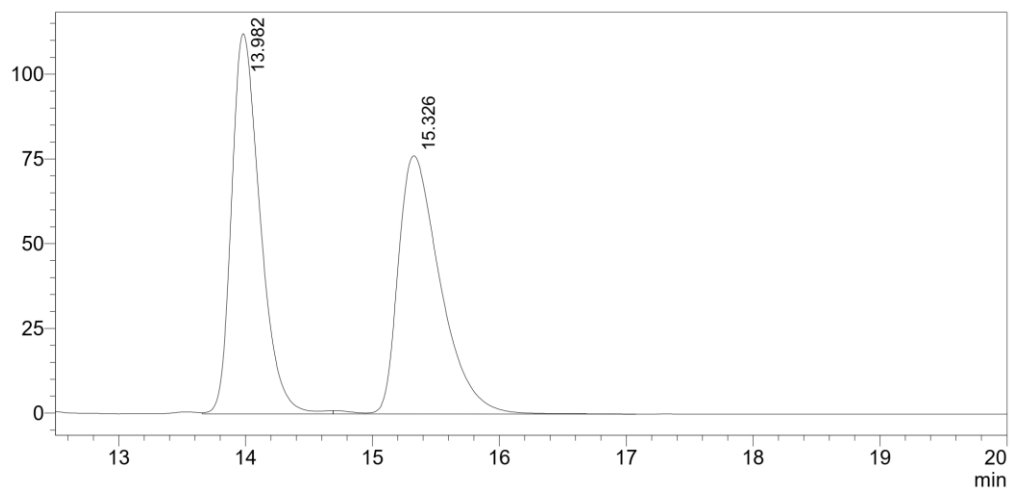

| Peak# | Ret. Time | Area    | Height | Area%   |
|-------|-----------|---------|--------|---------|
| 1     | 13.982    | 1764903 | 112250 | 50.086  |
| 2     | 15.326    | 1758847 | 76221  | 49.914  |
|       |           | 3523750 | 188471 | 100.000 |

mV

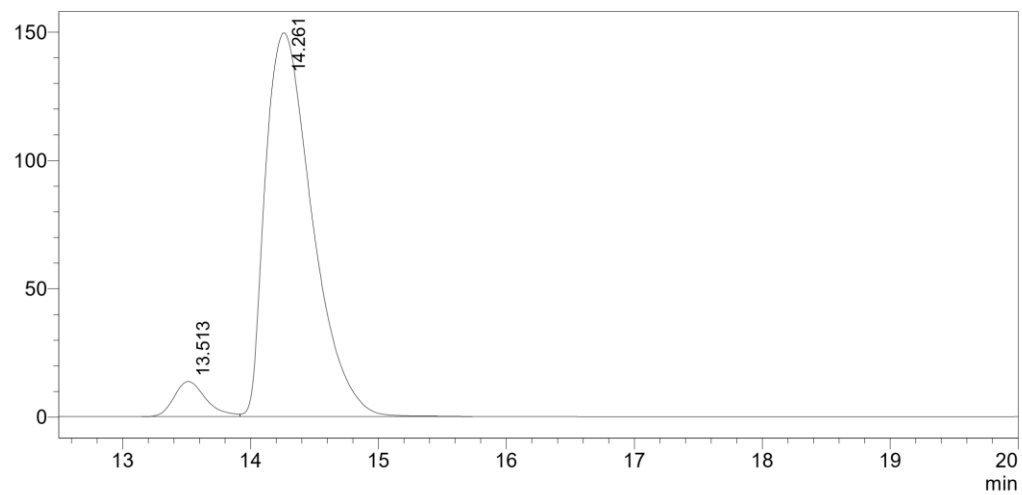

| Peak# | Ret. Time | Area    | Height | Area%   |
|-------|-----------|---------|--------|---------|
| 1     | 13.513    | 237461  | 13683  | 5.882   |
| 2     | 14.261    | 3799655 | 149462 | 94.118  |
|       |           | 4037116 | 163145 | 100.000 |

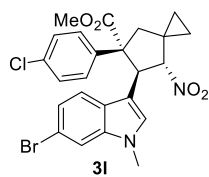

mV

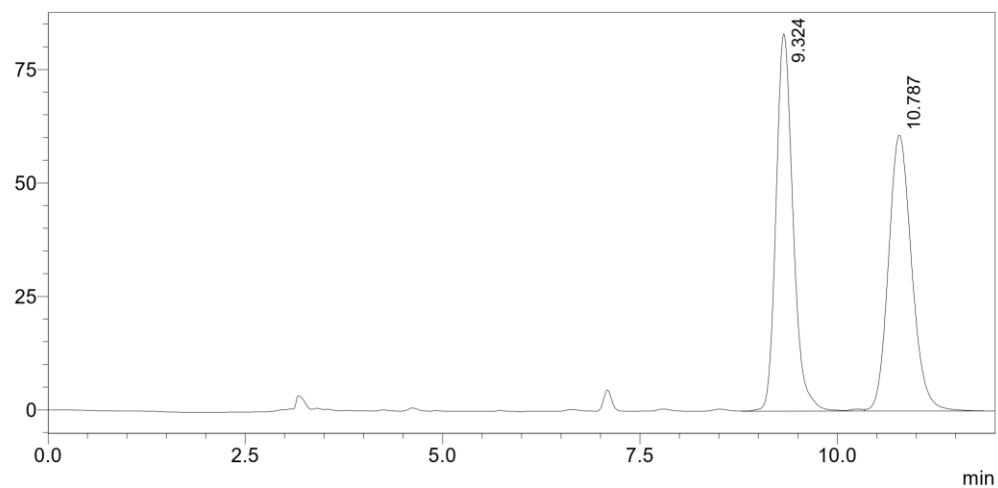

| Peak# | Ret. Time | Area    | Height | Area%   |
|-------|-----------|---------|--------|---------|
| 1     | 9.324     | 1252445 | 83164  | 50.139  |
| 2     | 10.787    | 1245484 | 60817  | 49.861  |
|       |           | 2497929 | 143981 | 100.000 |

mV

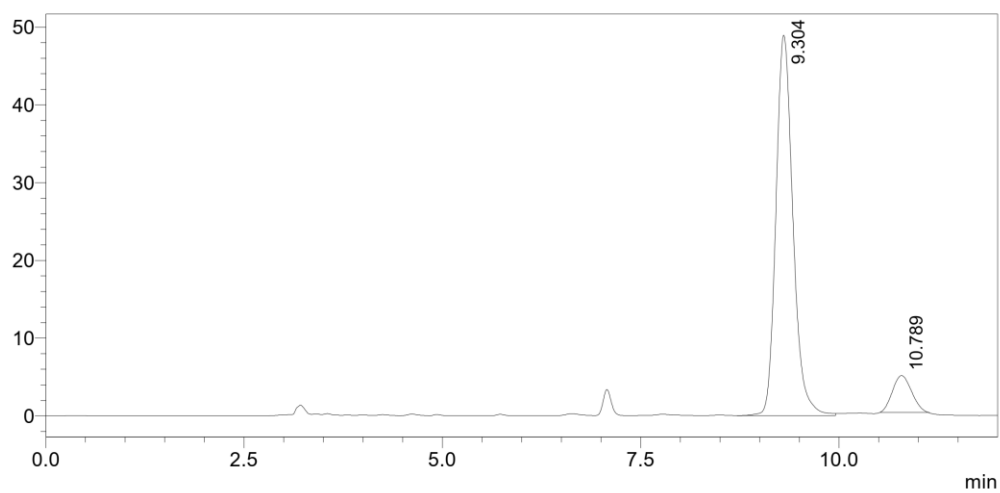

| Peak# | Ret. Time | Area   | Height | Area%   |
|-------|-----------|--------|--------|---------|
| 1     | 9.304     | 731458 | 48910  | 90.160  |
| 2     | 10.789    | 79827  | 4742   | 9.840   |
|       |           | 811285 | 53652  | 100.000 |

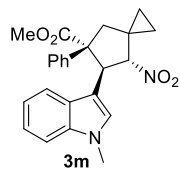

mV

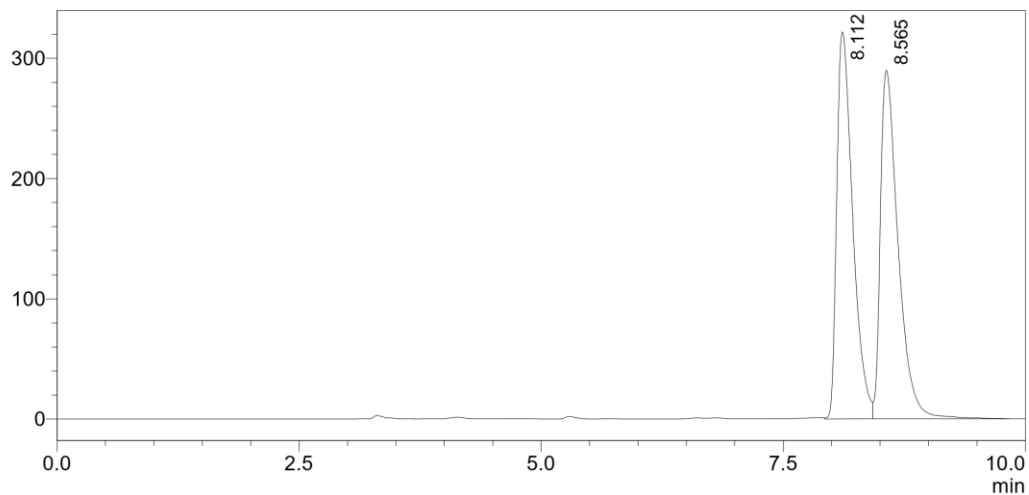

| Peak# | Ret. Time | Area    | Height | Area%   |
|-------|-----------|---------|--------|---------|
| 1     | 8.112     | 3697707 | 321664 | 49.961  |
| 2     | 8.565     | 3703492 | 289741 | 50.039  |
|       |           | 7401199 | 611405 | 100.000 |

mV

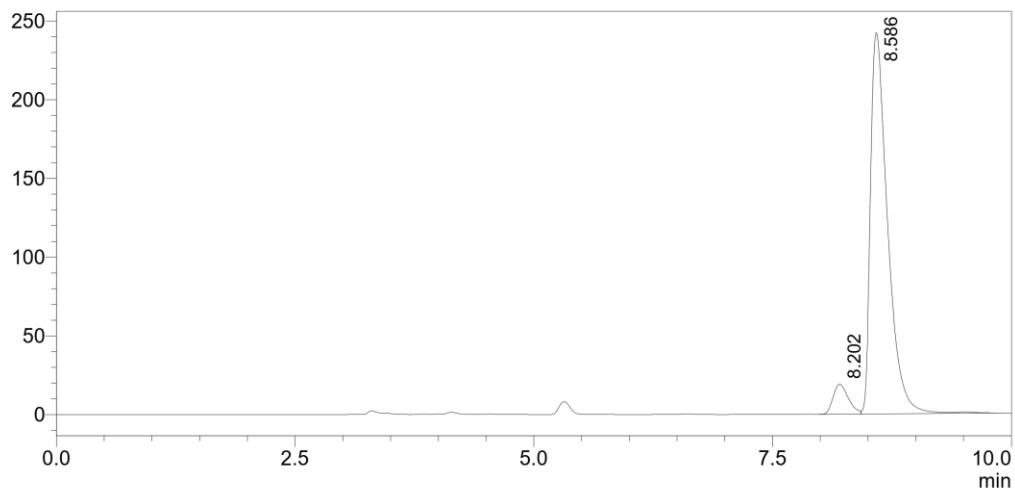

| Peak# | Ret. Time | Area    | Height | Area%   |
|-------|-----------|---------|--------|---------|
| 1     | 8.202     | 210115  | 19079  | 6.503   |
| 2     | 8.586     | 3020923 | 242048 | 93.497  |
|       |           | 3231038 | 261126 | 100.000 |

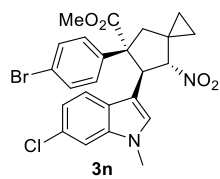

mV

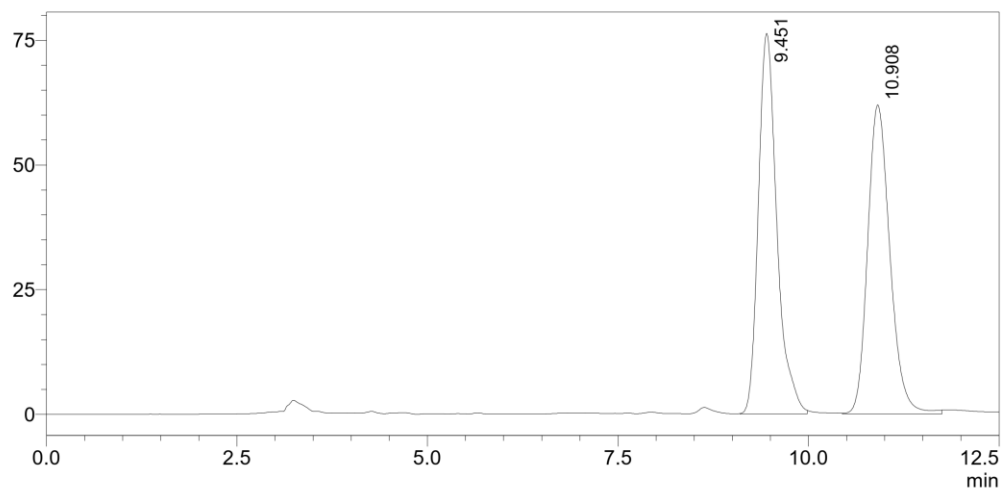

| Peak# | Ret. Time | Area    | Height | Area%   |
|-------|-----------|---------|--------|---------|
| 1     | 9.451     | 1295053 | 76393  | 50.555  |
| 2     | 10.908    | 1266635 | 62029  | 49.445  |
|       |           | 2561688 | 138422 | 100.000 |

mV

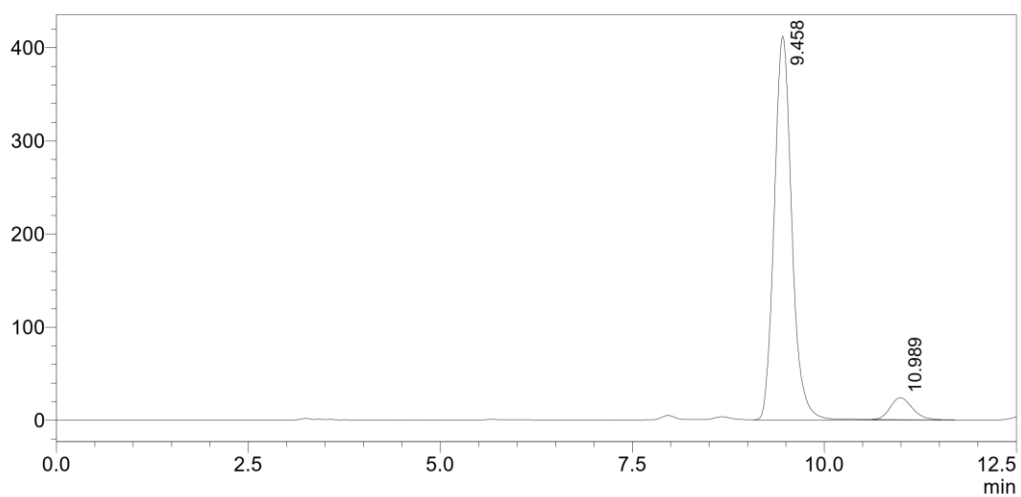

| Peak# | Ret. Time | Area    | Height | Area%   |
|-------|-----------|---------|--------|---------|
| 1     | 9.458     | 6596134 | 412217 | 93.362  |
| 2     | 10.989    | 468980  | 23509  | 6.638   |
|       |           | 7065114 | 435726 | 100.000 |



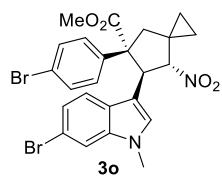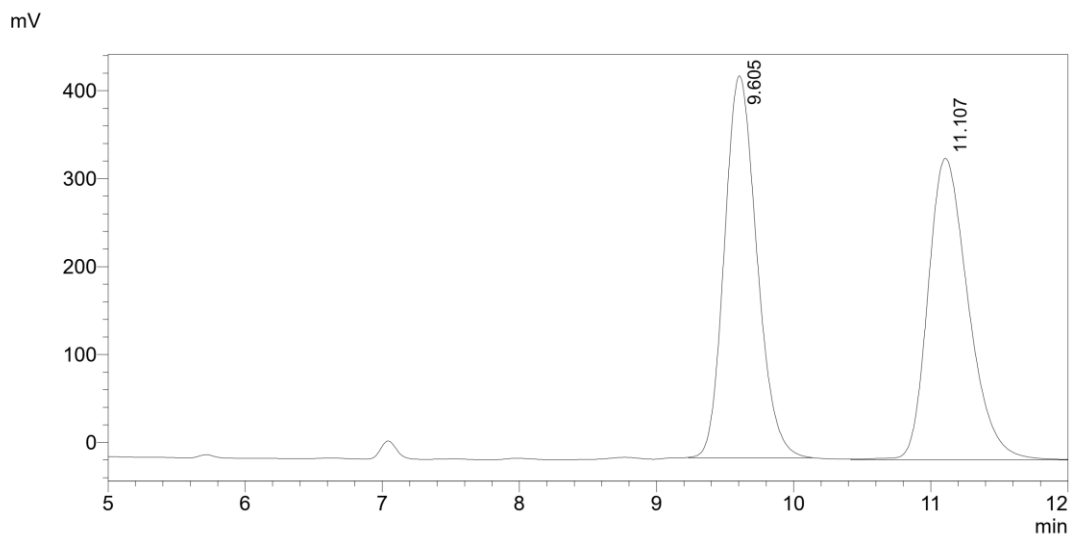

| Peak# | Ret. Time | Area     | Height | Area%   |
|-------|-----------|----------|--------|---------|
| 1     | 9.605     | 7139743  | 434248 | 50.483  |
| 2     | 11.107    | 7003232  | 343072 | 49.517  |
|       |           | 14142975 | 777320 | 100.000 |

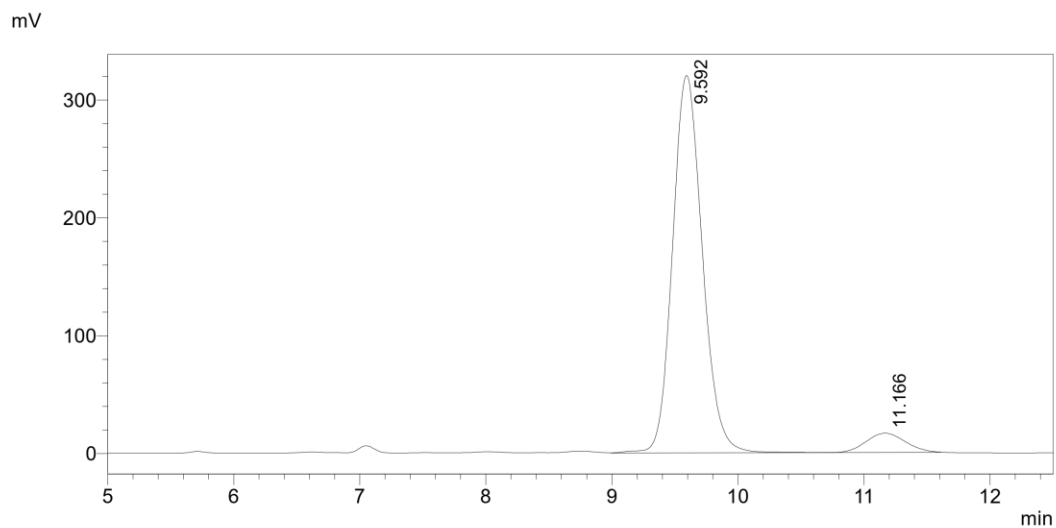

| Peak# | Ret. Time | Area    | Height | Area%   |
|-------|-----------|---------|--------|---------|
| 1     | 9.592     | 5261890 | 320306 | 93.693  |
| 2     | 11.166    | 354209  | 16303  | 6.307   |
|       |           | 5616099 | 336609 | 100.000 |

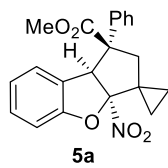

mV

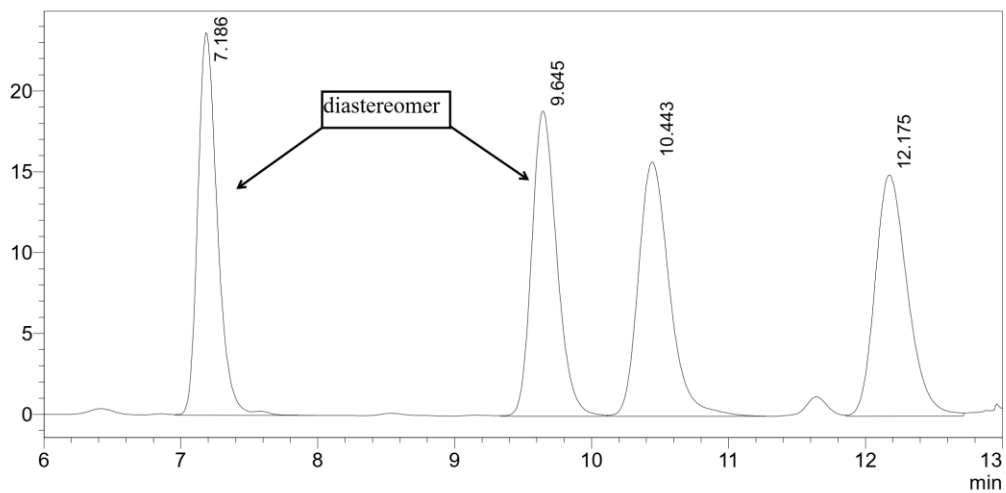

<Peak Table>

| Peak# | Ret. Time | Area   | Height | Area%   |
|-------|-----------|--------|--------|---------|
| 1     | 7.186     | 234721 | 23665  | 24.249  |
| 2     | 9.645     | 239885 | 18865  | 24.783  |
| 3     | 10.443    | 248203 | 15728  | 25.642  |
| 4     | 12.175    | 245141 | 14923  | 25.326  |
|       |           | 967951 | 73181  | 100.000 |

mV

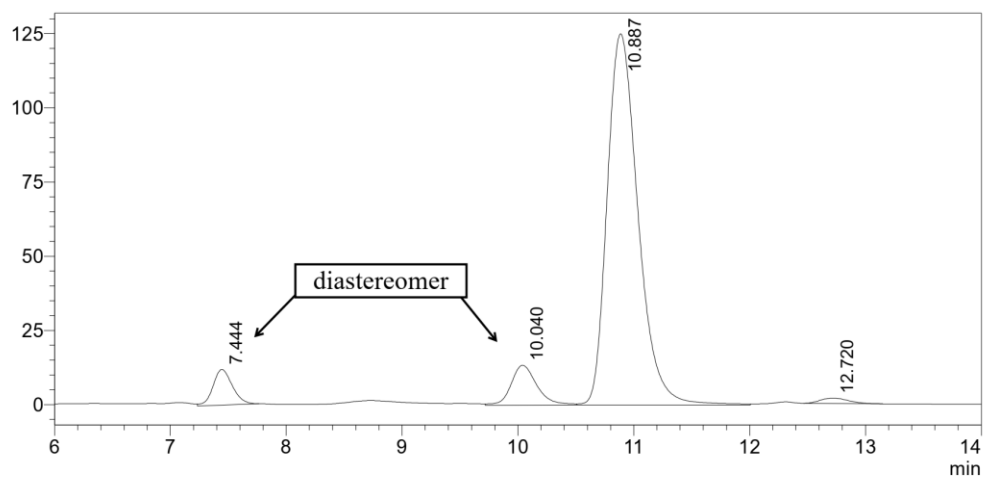

<Peak Table>

| Peak# | Ret. Time | Area    | Height | Area%   |
|-------|-----------|---------|--------|---------|
| 1     | 7.444     | 140207  | 12033  | 5.205   |
| 2     | 10.040    | 206954  | 13426  | 7.683   |
| 3     | 10.887    | 2314781 | 125004 | 85.939  |
| 4     | 12.720    | 31579   | 1870   | 1.172   |
|       |           | 2693521 | 152332 | 100.000 |

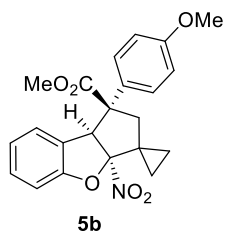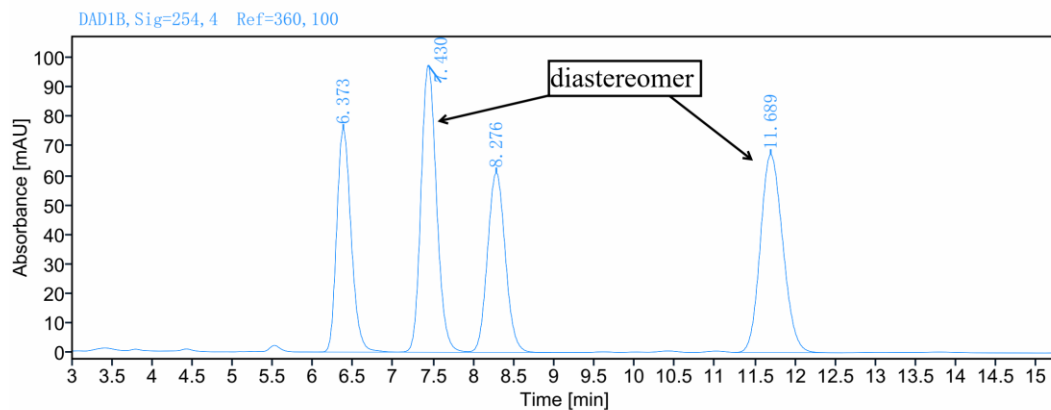

Signal: DAD1B, Sig=254, 4 Ref=360, 100

| Retention Time [min] | Area [mAU*min] | Height [mAU] | Relative Area [%] |
|----------------------|----------------|--------------|-------------------|
| 6.373                | 946.12         | 75.77        | 20.99             |
| 7.430                | 1309.49        | 97.61        | 29.05             |
| 8.276                | 941.40         | 61.13        | 20.88             |
| 11.689               | 1311.19        | 67.43        | 29.08             |

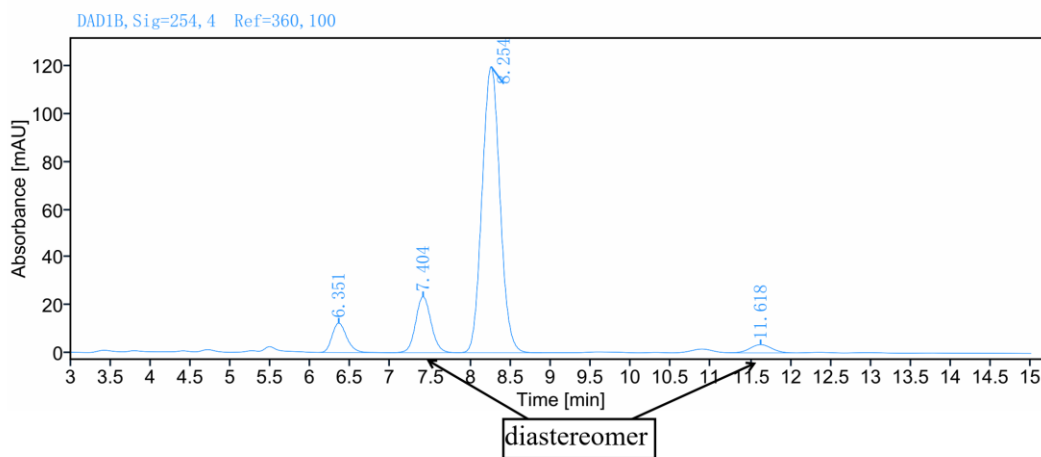

Signal: DAD1B, Sig=254, 4 Ref=360, 100

| Retention Time [min] | Area [mAU*min] | Height [mAU] | Relative Area [%] |
|----------------------|----------------|--------------|-------------------|
| 6.351                | 157.16         | 12.33        | 6.55              |
| 7.404                | 315.36         | 23.50        | 13.14             |
| 8.254                | 1863.09        | 119.93       | 77.62             |
| 11.618               | 64.73          | 3.44         | 2.70              |

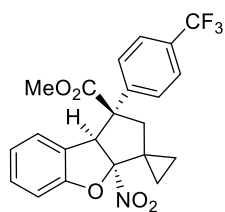

**5c**

mV

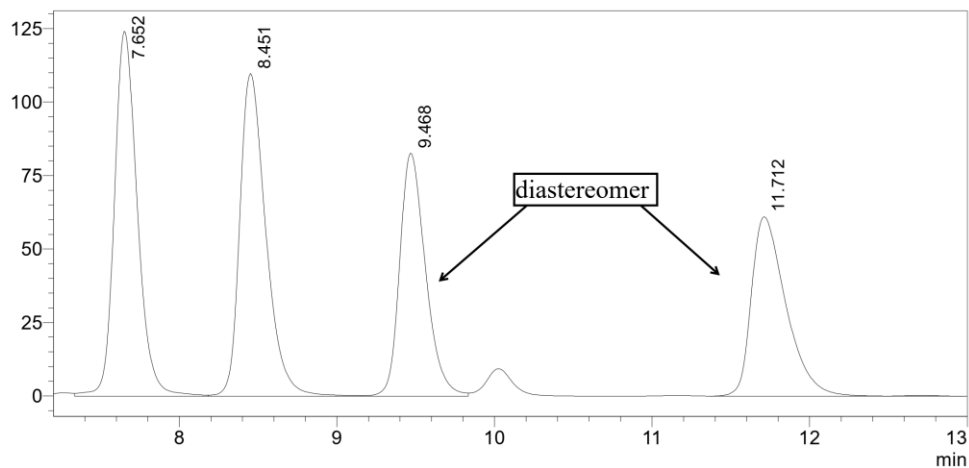

<Peak Table>

| Peak# | Ret. Time | Area    | Height | Area%   |
|-------|-----------|---------|--------|---------|
| 1     | 7.652     | 1259544 | 124184 | 28.631  |
| 2     | 8.451     | 1260909 | 109800 | 28.662  |
| 3     | 9.468     | 944772  | 82760  | 21.476  |
| 4     | 11.712    | 934017  | 61056  | 21.231  |
|       |           | 4399242 | 377799 | 100.000 |

mV

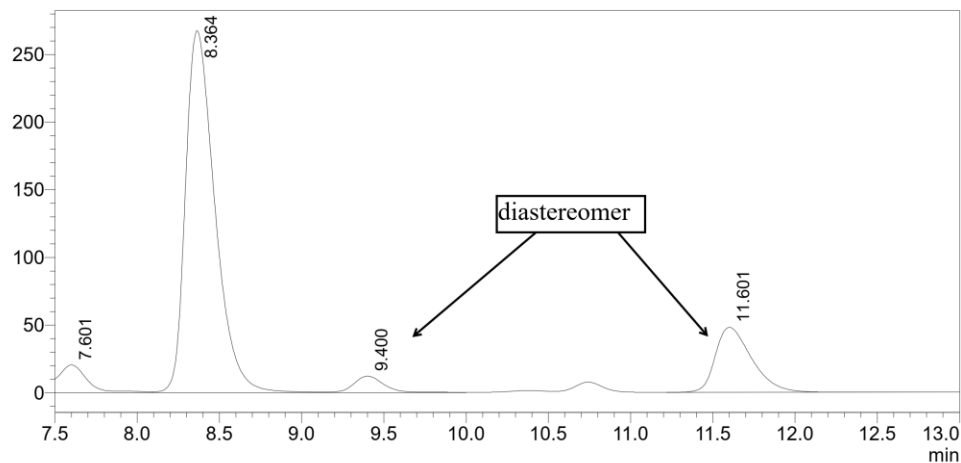

<Peak Table>

| Peak# | Ret. Time | Area    | Height | Area%   |
|-------|-----------|---------|--------|---------|
| 1     | 7.601     | 237697  | 20443  | 5.328   |
| 2     | 8.364     | 3328145 | 267508 | 74.605  |
| 3     | 9.400     | 155321  | 12187  | 3.482   |
| 4     | 11.601    | 739878  | 48082  | 16.585  |
|       |           | 4461041 | 348220 | 100.000 |

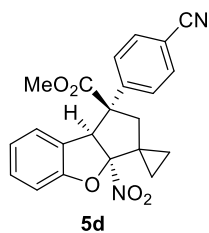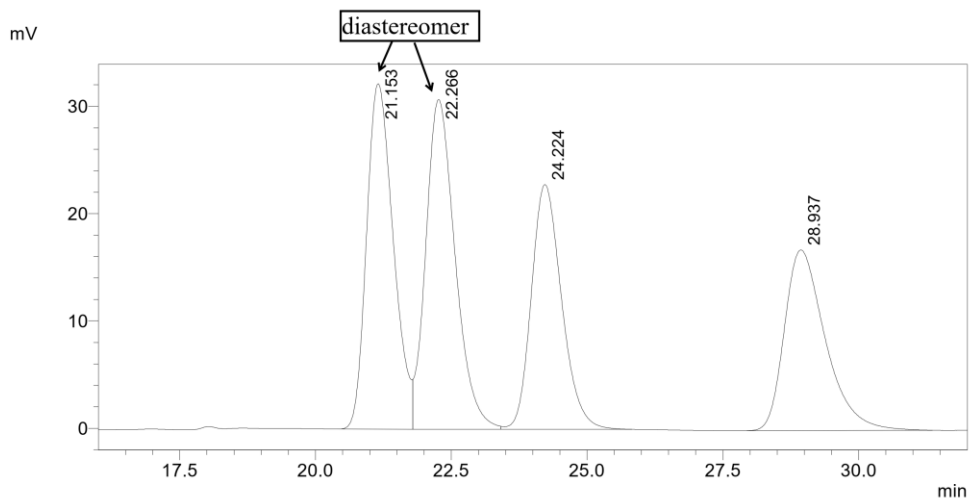

<Peak Table>

| Peak# | Ret. Time | Area    | Height | Area%   |
|-------|-----------|---------|--------|---------|
| 1     | 21.153    | 1105824 | 32185  | 27.449  |
| 2     | 22.266    | 1154072 | 30716  | 28.646  |
| 3     | 24.224    | 884995  | 22803  | 21.967  |
| 4     | 28.937    | 883828  | 16832  | 21.938  |
|       |           | 4028718 | 102536 | 100.000 |

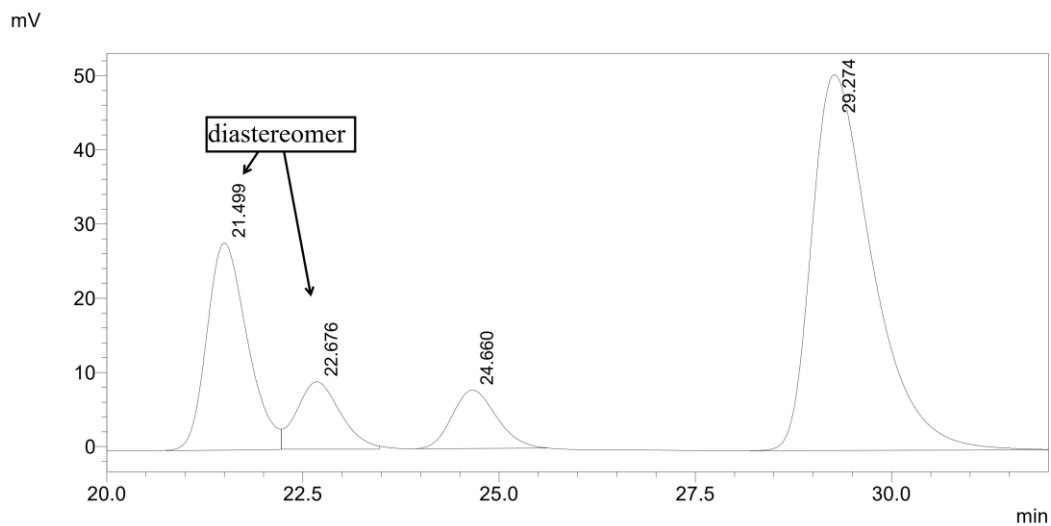

<Peak Table>

| Peak# | Ret. Time | Area    | Height | Area%   |
|-------|-----------|---------|--------|---------|
| 1     | 21.499    | 1002610 | 27935  | 22.825  |
| 2     | 22.676    | 352806  | 9104   | 8.032   |
| 3     | 24.660    | 308328  | 7858   | 7.019   |
| 4     | 29.274    | 2728942 | 50686  | 62.125  |
|       |           | 4392686 | 95584  | 100.000 |

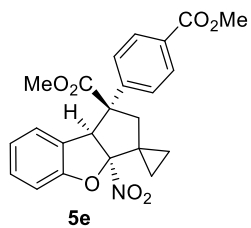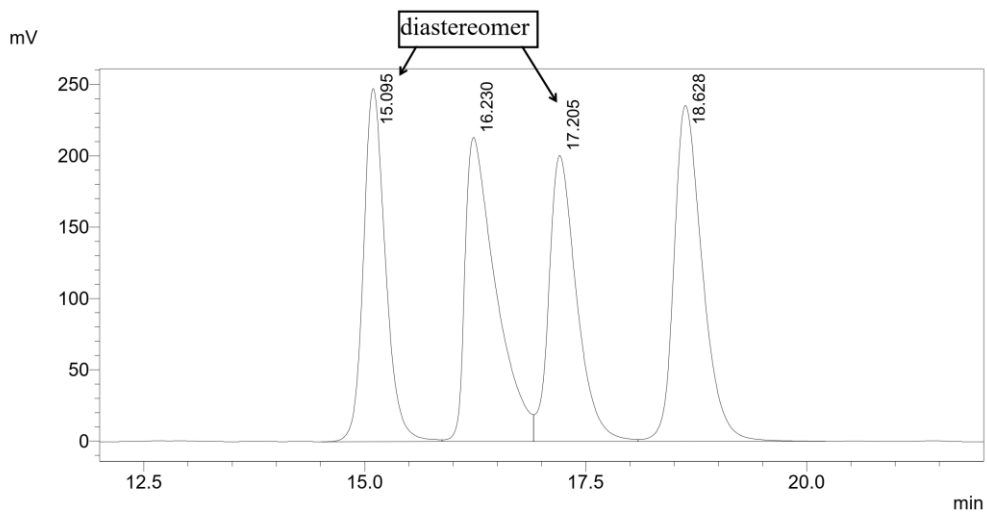

<Peak Table>

| Peak# | Ret. Time | Area     | Height | Area%   |
|-------|-----------|----------|--------|---------|
| 1     | 15.095    | 4271863  | 247502 | 22.379  |
| 2     | 16.230    | 5177778  | 213202 | 27.125  |
| 3     | 17.205    | 4371981  | 200615 | 22.903  |
| 4     | 18.628    | 5267128  | 235425 | 27.593  |
|       |           | 19088750 | 896743 | 100.000 |

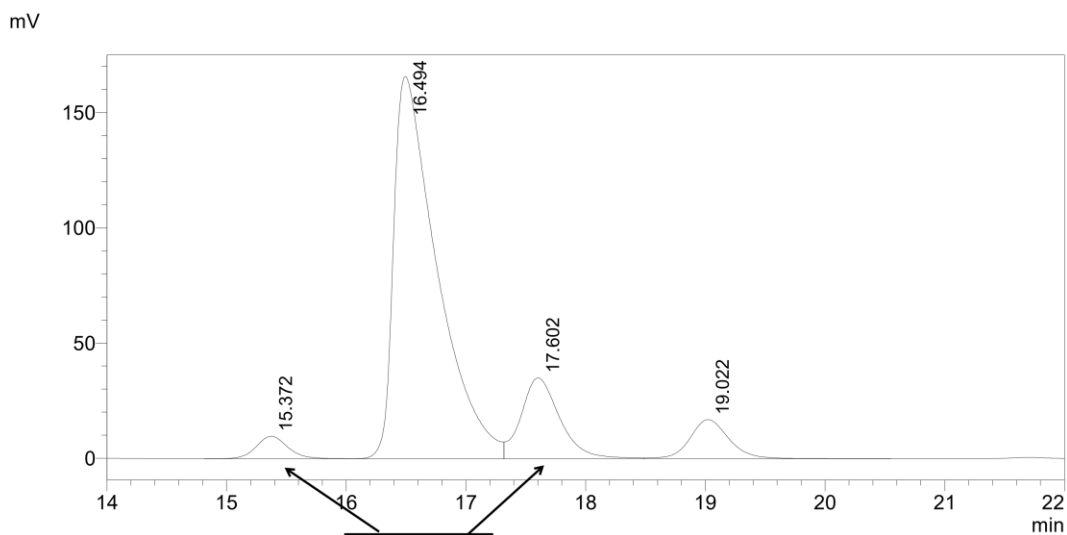

<Peak Table>

| Peak# | Ret. Time | Area    | Height | Area%   |
|-------|-----------|---------|--------|---------|
| 1     | 15.372    | 182513  | 9807   | 3.285   |
| 2     | 16.494    | 4192215 | 165902 | 75.464  |
| 3     | 17.602    | 791555  | 35136  | 14.249  |
| 4     | 19.022    | 389002  | 17009  | 7.002   |
|       |           | 5555285 | 227854 | 100.000 |

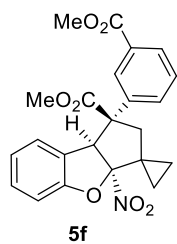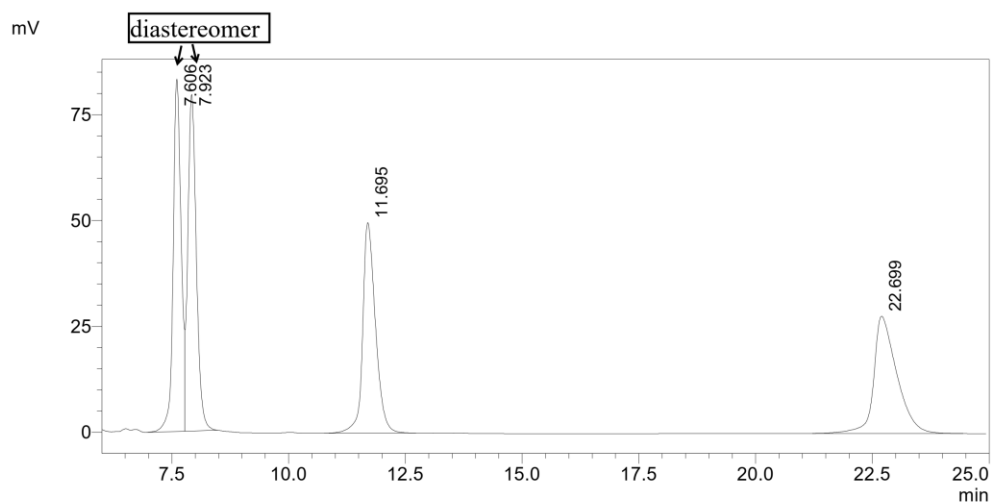

<Peak Table>

| Peak# | Ret. Time | Area    | Height | Area%   |
|-------|-----------|---------|--------|---------|
| 1     | 7.606     | 989146  | 83208  | 25.350  |
| 2     | 7.923     | 1013348 | 79486  | 25.971  |
| 3     | 11.695    | 948020  | 49690  | 24.296  |
| 4     | 22.699    | 951374  | 27688  | 24.382  |
|       |           | 3901888 | 240072 | 100.000 |

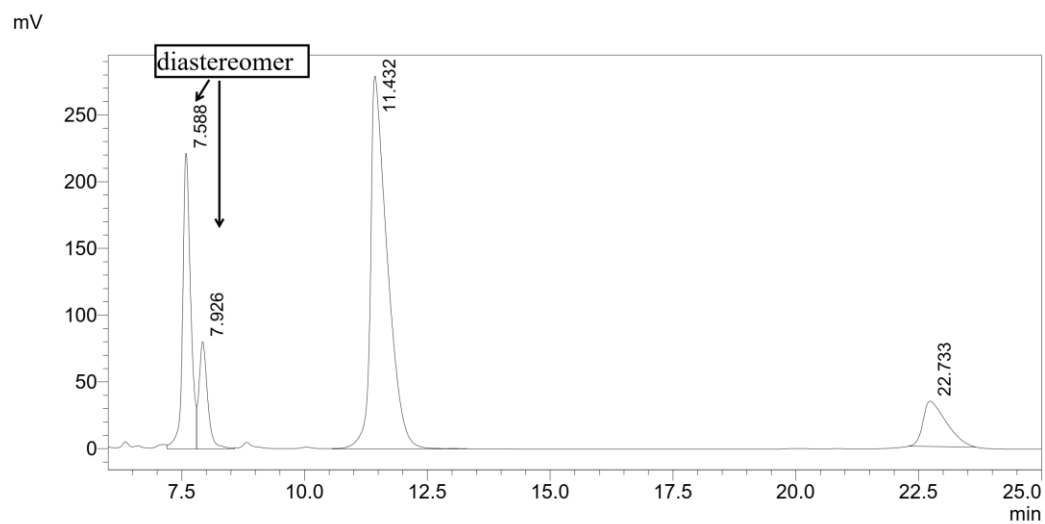

<Peak Table>

| Peak# | Ret. Time | Area     | Height | Area%   |
|-------|-----------|----------|--------|---------|
| 1     | 7.588     | 2495091  | 221431 | 22.107  |
| 2     | 7.926     | 980806   | 80430  | 8.690   |
| 3     | 11.432    | 6691557  | 279378 | 59.290  |
| 4     | 22.733    | 1118787  | 33891  | 9.913   |
|       |           | 11286241 | 615131 | 100.000 |

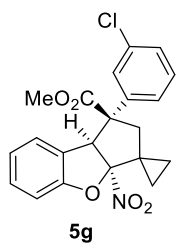

mV

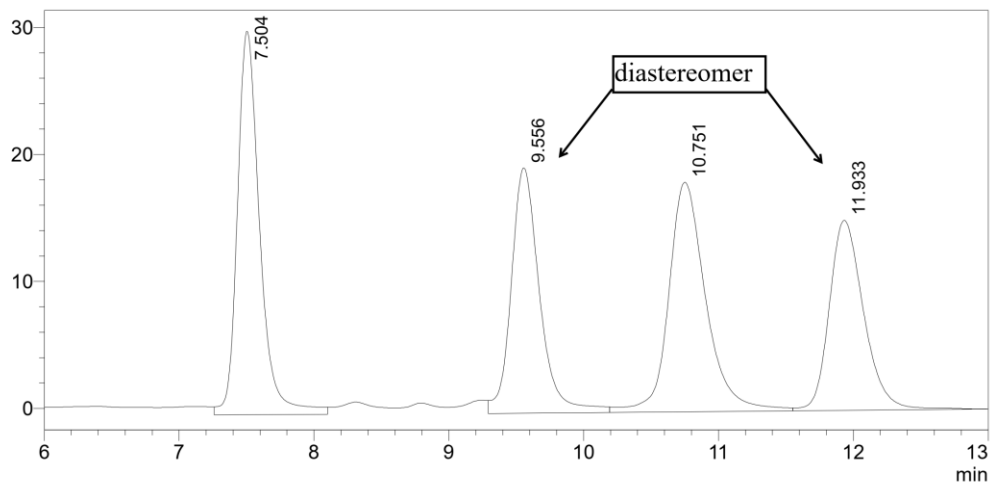

<Peak Table>

| Peak# | Ret. Time | Area    | Height | Area%   |
|-------|-----------|---------|--------|---------|
| 1     | 7.504     | 350517  | 30184  | 28.149  |
| 2     | 9.556     | 282561  | 19305  | 22.692  |
| 3     | 10.751    | 346352  | 18070  | 27.814  |
| 4     | 11.933    | 265793  | 14958  | 21.345  |
|       |           | 1245222 | 82517  | 100.000 |

mV

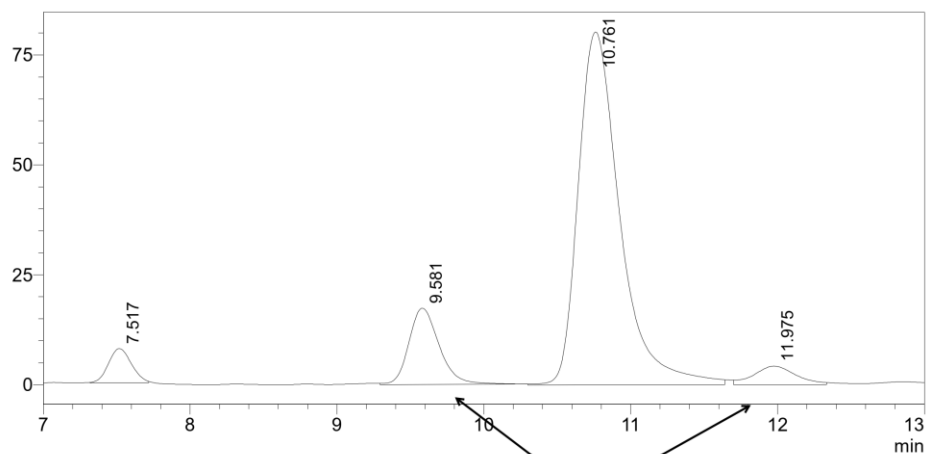

<Peak Table>

| Peak# | Ret. Time | Area    | Height | Area%   |
|-------|-----------|---------|--------|---------|
| 1     | 7.517     | 84378   | 7797   | 4.224   |
| 2     | 9.581     | 249483  | 17374  | 12.491  |
| 3     | 10.761    | 1579939 | 80304  | 79.101  |
| 4     | 11.975    | 83567   | 4201   | 4.184   |
|       |           | 1997367 | 109676 | 100.000 |



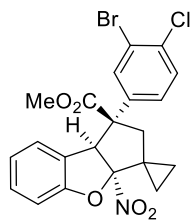

5h

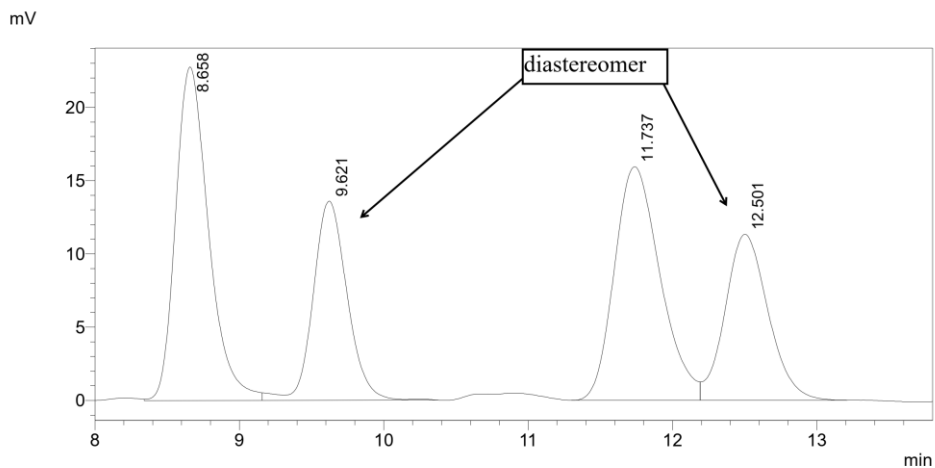

<Peak Table>

| Peak# | Ret. Time | Area    | Height | Area%   |
|-------|-----------|---------|--------|---------|
| 1     | 8.658     | 361744  | 22770  | 30.898  |
| 2     | 9.621     | 223465  | 13585  | 19.087  |
| 3     | 11.737    | 351464  | 15935  | 30.020  |
| 4     | 12.501    | 234092  | 11319  | 19.995  |
|       |           | 1170765 | 63610  | 100.000 |

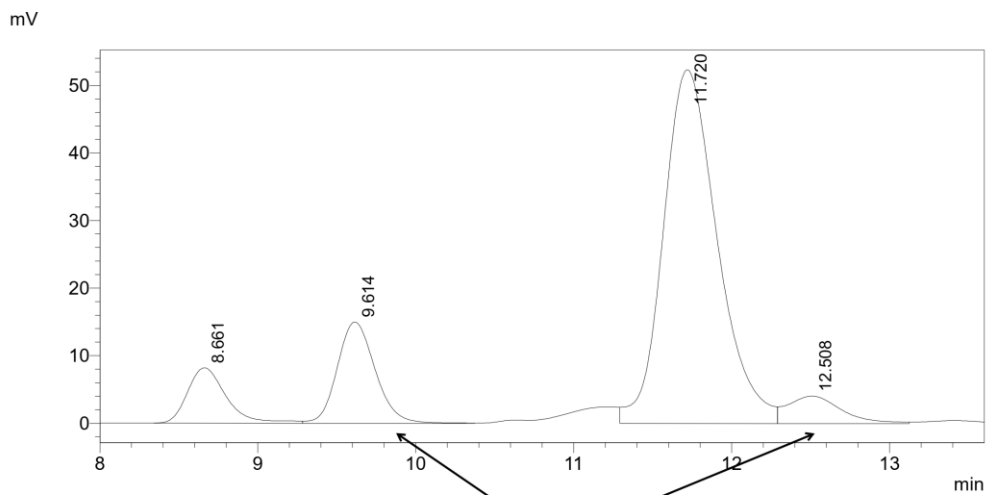

<Peak Table>

| Peak# | Ret. Time | Area    | Height | Area%   |
|-------|-----------|---------|--------|---------|
| 1     | 8.661     | 140030  | 8198   | 8.085   |
| 2     | 9.614     | 250195  | 14994  | 14.445  |
| 3     | 11.720    | 1245626 | 52349  | 71.916  |
| 4     | 12.508    | 96213   | 4070   | 5.555   |
|       |           | 1732064 | 79612  | 100.000 |

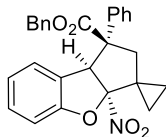

5i

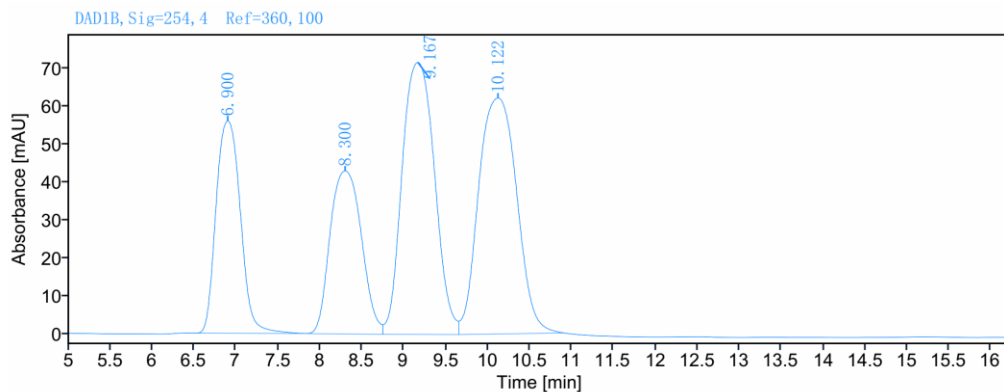

Signal: DAD1B, Sig=254, 4 Ref=360, 100

| Retention Time [min] | Area [mAU*min] | Height [mAU] | Relative Area [%] |
|----------------------|----------------|--------------|-------------------|
| 6.900                | 1131.80        | 56.01        | 18.37             |
| 8.300                | 1119.51        | 43.00        | 18.17             |
| 9.167                | 1936.70        | 71.77        | 31.44             |
| 10.122               | 1971.88        | 62.23        | 32.01             |

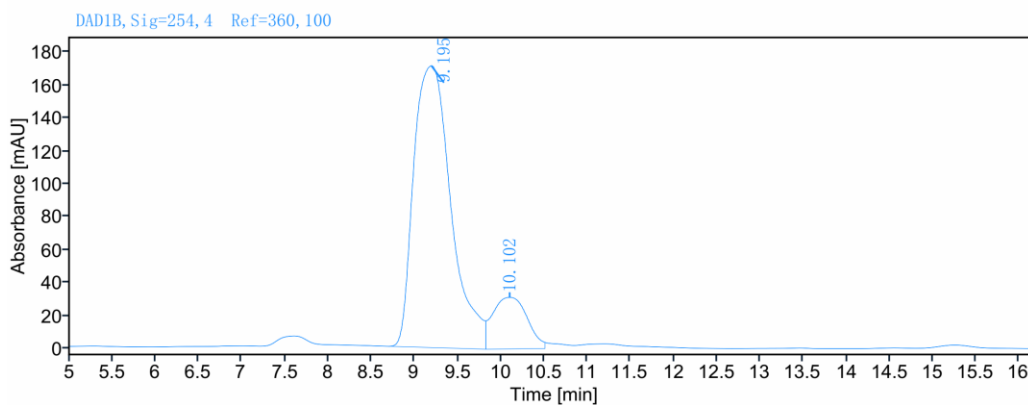

Signal: DAD1B, Sig=254, 4 Ref=360, 100

| Retention Time [min] | Area [mAU*min] | Height [mAU] | Relative Area [%] |
|----------------------|----------------|--------------|-------------------|
| 9.195                | 5137.48        | 171.08       | 85.51             |
| 10.102               | 870.50         | 31.31        | 14.49             |

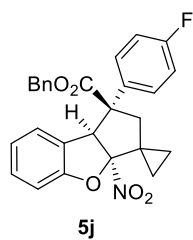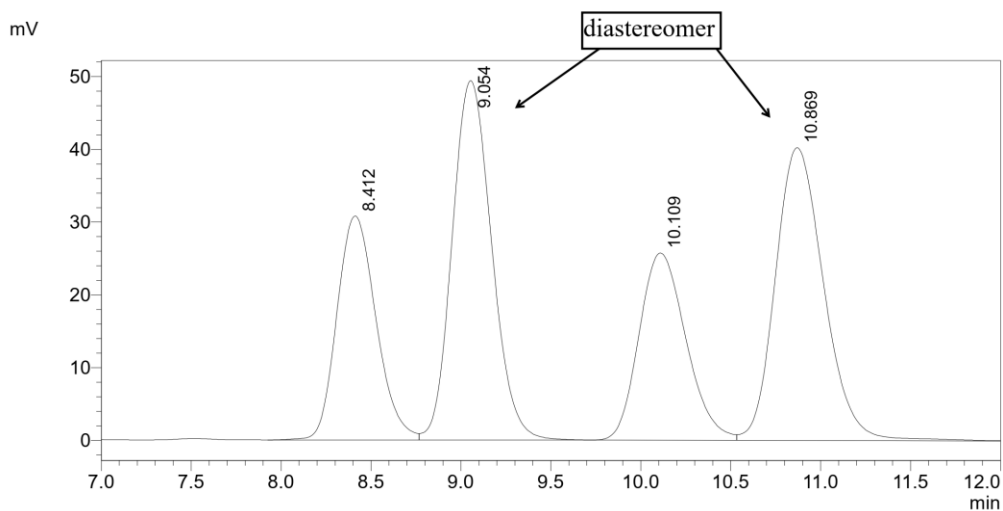

<Peak Table>

| Peak# | Ret. Time | Area    | Height | Area%   |
|-------|-----------|---------|--------|---------|
| 1     | 8.412     | 465936  | 30771  | 19.098  |
| 2     | 9.054     | 754377  | 49397  | 30.920  |
| 3     | 10.109    | 465994  | 25732  | 19.100  |
| 4     | 10.869    | 753428  | 40233  | 30.882  |
|       |           | 2439736 | 146134 | 100.000 |

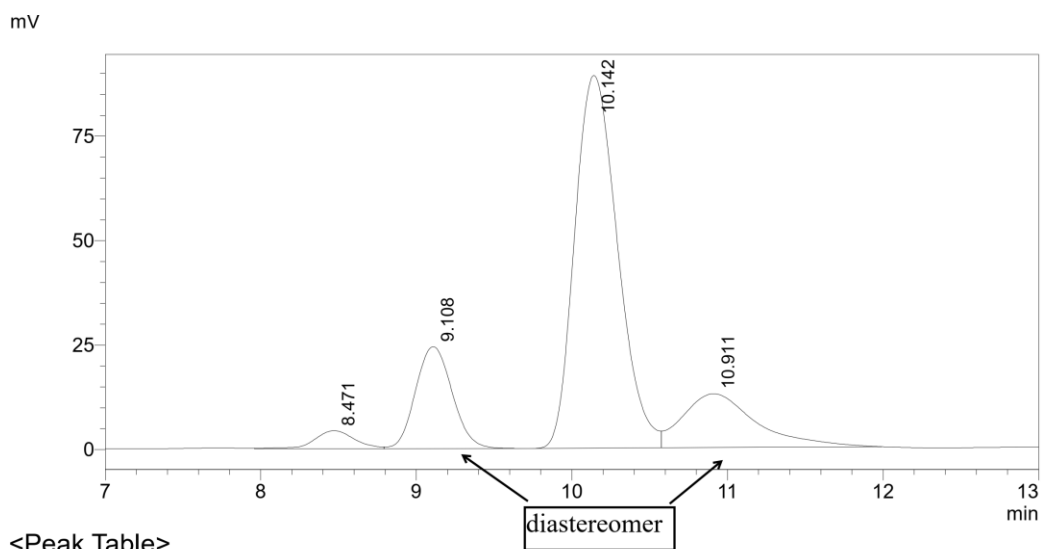

<Peak Table>

| Peak# | Ret. Time | Area    | Height | Area%   |
|-------|-----------|---------|--------|---------|
| 1     | 8.471     | 78098   | 4322   | 2.988   |
| 2     | 9.108     | 399977  | 24427  | 15.305  |
| 3     | 10.142    | 1711606 | 89242  | 65.492  |
| 4     | 10.911    | 423774  | 12876  | 16.215  |
|       |           | 2613454 | 130867 | 100.000 |

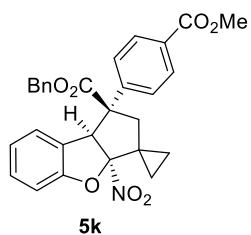

mV

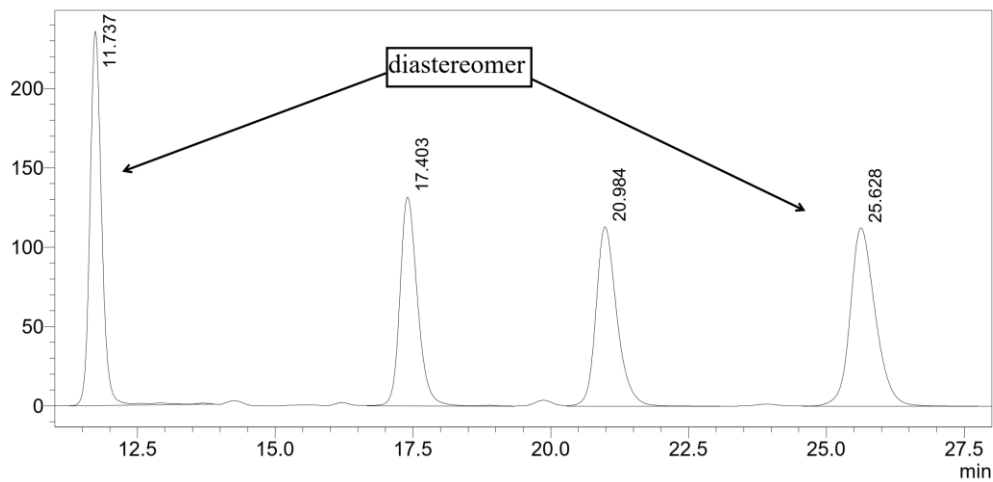

<Peak Table>

| Peak# | Ret. Time | Area     | Height | Area%   |
|-------|-----------|----------|--------|---------|
| 1     | 11.737    | 3492295  | 235850 | 26.925  |
| 2     | 17.403    | 2921583  | 131731 | 22.525  |
| 3     | 20.984    | 2986611  | 112956 | 23.026  |
| 4     | 25.628    | 3570166  | 112402 | 27.525  |
|       |           | 12970655 | 592938 | 100.000 |

mV

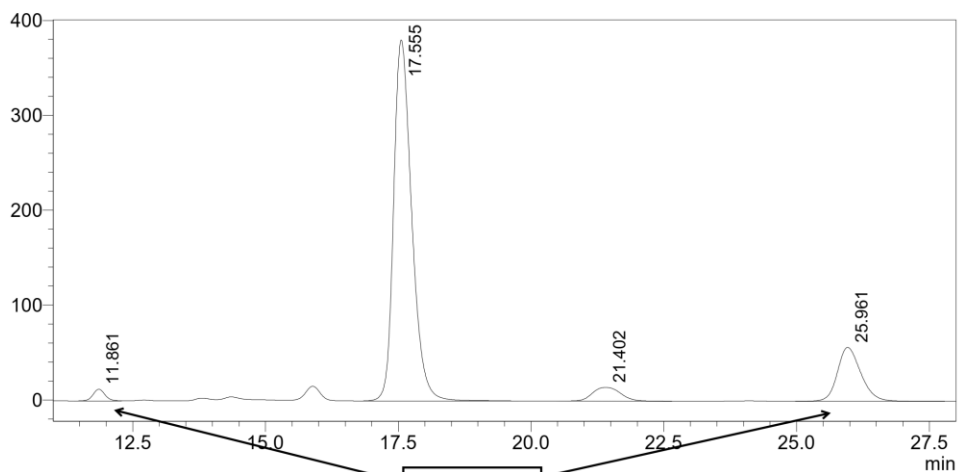

<Peak Table>

| Peak# | Ret. Time | Area     | Height | Area%   |
|-------|-----------|----------|--------|---------|
| 1     | 11.861    | 194503   | 12383  | 1.696   |
| 2     | 17.555    | 9001904  | 380379 | 78.476  |
| 3     | 21.402    | 527595   | 14394  | 4.599   |
| 4     | 25.961    | 1746931  | 56796  | 15.229  |
|       |           | 11470932 | 463953 | 100.000 |

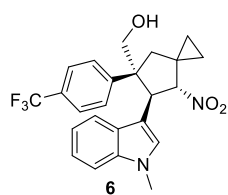

mV

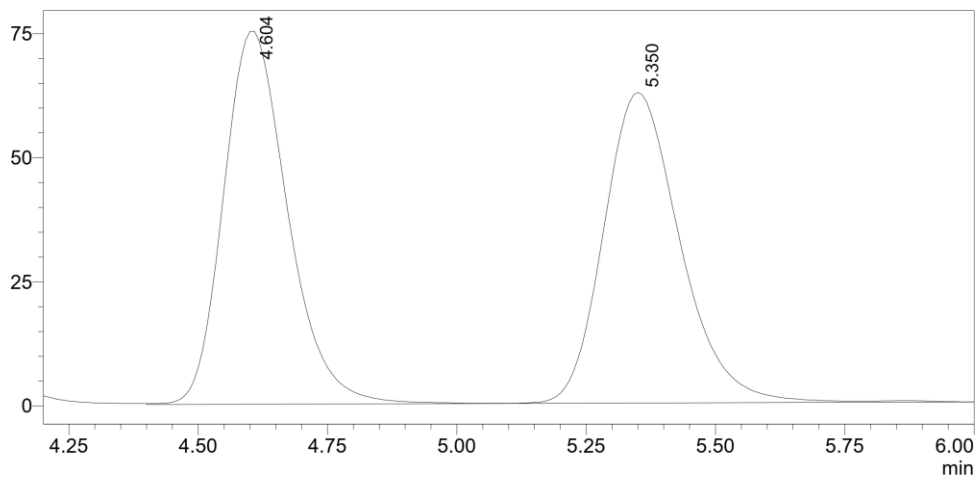

| Peak# | Ret. Time | Area    | Height | Area%   |
|-------|-----------|---------|--------|---------|
| 1     | 4.604     | 649487  | 75138  | 50.127  |
| 2     | 5.350     | 646195  | 62597  | 49.873  |
|       |           | 1295682 | 137735 | 100.000 |

mV

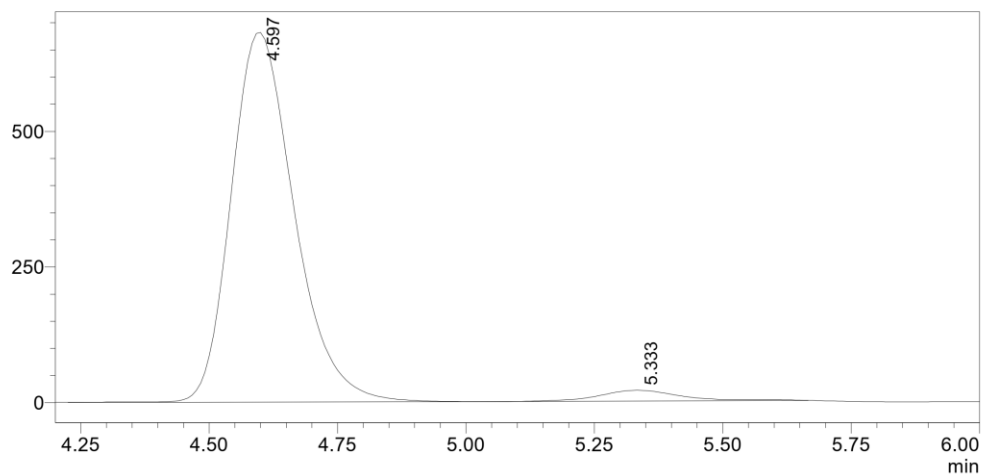

| Peak# | Ret. Time | Area    | Height | Area%   |
|-------|-----------|---------|--------|---------|
| 1     | 4.597     | 5831648 | 681413 | 96.308  |
| 2     | 5.333     | 223528  | 19971  | 3.692   |
|       |           | 6055175 | 701383 | 100.000 |
